# Supplementary material
Source: PubMed Central journal article supplement (PMC3740945)

# **CHEMISTRY**

---

## **A EUROPEAN JOURNAL**

---

### Supporting Information

© Copyright Wiley-VCH Verlag GmbH & Co. KGaA, 69451 Weinheim, 2013

#### **Tricycles by a New Ugi Variation and Pictet–Spengler Reaction in One Pot**

**Mantosh K. Sinha,<sup>[b]</sup> Kareem Khoury,<sup>[b]</sup> Eberhardt Herdtweck,<sup>[c]</sup> and  
Alexander Dömling\*<sup>[a, b]</sup>**

chem\_201300962\_sm\_miscellaneous\_information.pdf

## List of Contents

|                                                                                   |     |
|-----------------------------------------------------------------------------------|-----|
| 1. General information.....                                                       | 2S  |
| 2. General procedure for Ugi-Pictet-Spengler reaction.....                        | 2S  |
| 3. Characterization data of the Ugi-Pictet-Spengler indole derivatives.....       | 2S  |
| 4. Characterization data of the Ugi-Pictet-Spengler Isoquinoline derivatives..... | 8S  |
| 5. Single Crystal X-Ray Structure Determination of Compound <b>32</b> .....       | 12S |
| 6. <sup>1</sup> H, <sup>13</sup> C NMR and SFC-UV mass spectra.....               | 16S |

### General information:

All reactions were carried out either under air or nitrogen. Solvents were purchased from Aldrich, Fisher Scientific, Acros Organics or Alfa Aesar and used as received.  $^1\text{H}$ - and  $^{13}\text{C}$  NMR spectra were recorded on a Bruker Ultrashield Plus 600. Chemical shift values are in ppm relative either to  $\text{CDCl}_3$  or  $\text{DMSO-d}_6$ . Abbreviations used are s = singlet, brs = broad singlet d = doublet, dd = double doublet, t = triplet, td = triple doublet, dt = double triplet q=quartet, m= multiplet; data in parenthesis are given in the following order: multiplicity, number of protons, and coupling constants in Hz. Column flash chromatography (ISCO) was performed using solvents Dichloromethane, Ethyl Acetate, Hexanes, and Methanol, and Preparative Waters Super Critical Fluid Chromatography (SFC) was performed using solvent system of Methanol and  $\text{CO}_2$ . MS spectra were recorded on a SFC with a 3100 MS Detector.

### General procedure of Ugi-Pictet-Spengler reaction:

A mixture of L-amino acid (0.5 mmol), ketone (0.5 mmol), isocyanide (0.5 mmol) and Aminoacetaldehyde dimethyl acetal (0.5 mmol), in 0.1 M of  $\text{MeOH}/\text{H}_2\text{O}$  (4:1) were stirred for 24 – 72 hours at room temperature (In the case of 3,4-Dimethoxy phenylalanine, the reaction mixture was heated at 50 °C for 72 hours). Solvents were evaporated under reduced pressure. The crude Ugi product was dissolved in formic acid (2 mL) and stirred for another 16 h at room temperature. Reaction mixture was diluted with DCM and solid  $\text{K}_2\text{CO}_3$  was added slowly until the mixture was neutralized. The excess  $\text{K}_2\text{CO}_3$  was filtered off on celite and solvents were evaporated to obtain crude product, which was purified to yield title compound.

### 1-methyl-4-((5S)-4-oxo-2,3,4,5,6,11-hexahydro-1H-1,5-epiminoazocino[4,5-b]indol-12-yl)-N-phenethylpiperidine-4-carboxamide [19]:

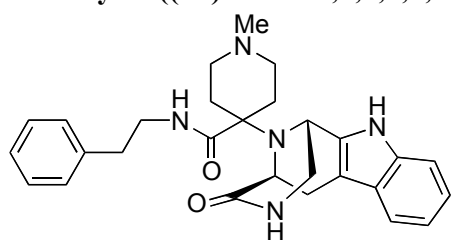

Purified by SFC ( $\text{CO}_2/\text{MeOH}$ ); Yield 42% (99 mg) as a light yellowish solid;  $^1\text{H}$  NMR (600 MHz,  $\text{DMSO-d}_6$ )  $\delta$ : 1.56-1.62 (m, 1H), 1.78-1.85 (m, 2H), 1.92-1.99 (m, 2H), 2.04 (s, 3H), 2.04-2.09 (m, 1H), 2.39-2.43 (m, 1H), 2.50-2.59 (m, 3H), 2.69 (d,  $J = 15.6$  Hz, 1H), 2.97 (dd,  $J = 15.0, 5.4$  Hz, 1H), 3.02 (dd,  $J = 10.8, 3.0$  Hz, 1H), 3.10-3.15 (m,

2H), 3.55 (dd,  $J = 11.4, 4.2$  Hz, 1H), 3.97 (d,  $J = 5.4$  Hz, 1H), 4.35 (s, 1H), 6.93 (t,  $J = 7.8$  Hz, 1H), 7.00-7.06 (m, 3H), 7.15 (t,  $J = 7.2$  Hz, 1H), 7.23 (t,  $J = 7.2$  Hz, 2H), 7.29 (d,  $J = 8.4$  Hz, 1H), 7.33 (d,  $J = 7.8$  Hz, 1H), 7.40 (d,  $J = 3.0$  Hz, 1H), 7.85 (brs, 1H), 10.71 (s, 1H);  $^{13}\text{C}$  NMR (150 MHz,  $\text{DMSO-d}_6$ )  $\delta$ : 24.6, 30.4, 32.0, 34.6, 40.0, 40.3, 44.9, 45.6, 47.2, 51.9, 52.5, 54.2, 106.9, 111.1, 117.4, 118.4, 120.7, 126.0, 126.6, 128.2, 128.5, 134.3, 135.4, 139.5, 171.6, 172.3 ppm. SFCMS (APCI,  $m/z$ ):  $[\text{M}]^+$  calc.: 472.59; found: 473.24.

### 1-((5S)-4-oxo-2,3,4,5,6,11-hexahydro-1H-1,5-epiminoazocino[4,5-b]indol-12-yl)-N-phenethylcycloheptanecarboxamide [20]:

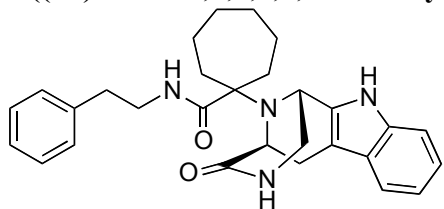

Purified by SFC ( $\text{CO}_2/\text{MeOH}$ ); Yield 52% (122 mg) as a light yellowish solid;  $^1\text{H}$  NMR (600 MHz,  $\text{DMSO-d}_6$ )  $\delta$ : 1.25-1.55 (m, 9H), 1.73-1.78 (m, 1H), 1.95-2.04 (m, 2H), 2.68-2.75 (m, 3H), 2.93-2.98 (m, 2H), 3.28 (q,  $J = 13.8, 7.2$  Hz, 2H), 3.49 (dd,  $J = 11.4, 4.2$  Hz, 1H), 3.85 (d,  $J = 5.4$  Hz, 1H), 4.04 (d,  $J = 3.6$  Hz, 1H), 6.94 (t,  $J = 7.2$  Hz, 1H), 7.03

(t,  $J = 7.2$  Hz, 1H), 7.16-7.21 (m, 3H), 7.26-7.31 (m, 3H), 7.35 (d,  $J = 7.8$  Hz, 1H), 7.39 (d,  $J = 3.6$  Hz, 1H), 7.86 (t,  $J = 5.4$  Hz, 1H), 10.73 (s, 1H);  $^{13}\text{C}$  NMR (150 MHz,  $\text{DMSO-d}_6$ )  $\delta$ : 23.0,

33.8, 24.8, 29.3, 29.5, 32.5, 35.1, 35.3, 40.5, 46.3, 47.2, 54.6, 68.6, 106.9, 111.2, 117.5, 118.5, 120.8, 126.0, 126.5, 128.3, 128.5, 134.3, 135.4, 139.5, 171.5, 175.4 ppm. SFCMS (APCI,  $m/z$ ):  $[M]^+$  calc.: 471.61; found: 471.25.

**1-((5S)-4-oxo-2,3,4,5,6,11-hexahydro-1H-1,5-epiminoazocino[4,5-b]indol-12-yl)-N-**

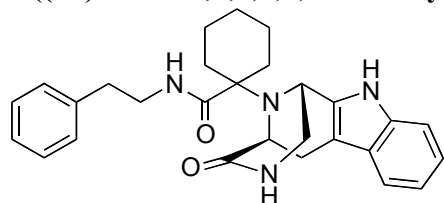

**phenethylcyclohexanecarboxamide [21]:** Purified by SFC ( $\text{CO}_2/\text{MeOH}$ ); Yield 48% (109 mg) as a light yellowish solid;  $^1\text{H}$  NMR (600 MHz,  $\text{DMSO-d}_6$ )  $\delta$ : 1.07-1.16 (m, 2H), 1.34-1.46 (m, 4H), 1.53-1.57 (m, 1H), 1.62-1.67 (m, 1H), 1.87-1.94 (m, 2H), 2.53-2.62 (m, 2H), 2.70 (d,  $J = 15.0$  Hz, 1H), 2.97 (dd,  $J = 15.6, 5.4$  Hz, 1H), 3.02 (dd,  $J = 10.8,$

3.0 Hz, 1H), 3.15 (q,  $J = 13.2, 7.2$  Hz, 2H), 3.54 (dd,  $J = 11.4, 4.2$  Hz, 1H), 3.99 (d,  $J = 5.4$  Hz, 1H), 4.33 (d,  $J = 3.6$  Hz, 1H), 6.93 (t,  $J = 7.8$  Hz, 1H), 7.02 (t,  $J = 7.2$  Hz, 1H), 7.07 (d,  $J = 7.2$  Hz, 2H), 7.16 (t,  $J = 7.2$  Hz, 1H), 7.24 (t,  $J = 7.2$  Hz, 2H), 7.29 (d,  $J = 8.4$  Hz, 1H), 7.34 (d,  $J = 7.8$  Hz, 1H), 7.39 (d,  $J = 3.6$  Hz, 1H), 7.81 (t,  $J = 6.0$  Hz, 1H), 10.71 (s, 1H);  $^{13}\text{C}$  NMR (150 MHz,  $\text{DMSO-d}_6$ )  $\delta$ : 22.6, 22.8, 24.7, 25.1, 30.9, 32.6, 34.8, 40.4, 45.0, 47.2, 54.1, 63.4, 106.9, 111.1, 117.4, 118.4, 120.6, 126.0, 126.6, 128.2, 128.4, 134.6, 135.4, 139.5, 171.7, 173.1 ppm. SFCMS (APCI,  $m/z$ ):  $[M]^+$  calc.: 457.58; found 457.25.

**1-((5S)-8-hydroxy-4-oxo-2,3,4,5,6,11-hexahydro-1H-1,5-epiminoazocino[4,5-b]indol-12-yl)-**

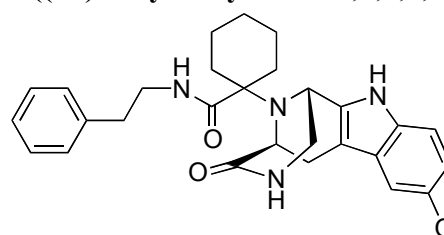

**N-phenethylcyclohexane-carboxamide [22]:** Purified by SFC ( $\text{CO}_2/\text{MeOH}$ ); Yield 35% (82 mg) as a light brownish solid;  $^1\text{H}$  NMR (600 MHz,  $\text{DMSO-d}_6$ )  $\delta$ : 1.05-1.14 (m, 2H), 1.52-1.55 (m, 1H), 1.60-1.64 (m, 1H), 1.85-1.92 (m, 2H), 2.56-2.64 (m, 3H), 2.87 (dd,  $J = 21.0,$

6.0 Hz, 1H), 2.98 (dd,  $J = 11.4, 4.2$  Hz, 1H), 3.17 (q,  $J = 13.8, 7.2$  Hz, 2H), 3.51 (dd,  $J = 11.4, 4.8$  Hz, 1H), 3.94 (d,  $J = 5.4$  Hz, 1H), 4.25 (d,  $J = 4.2$  Hz, 1H), 6.52 (dd,  $J = 8.4, 2.4$  Hz, 1H), 6.64 (d,  $J = 1.8$  Hz, 1H), 7.06 (d,  $J = 8.4$  Hz, 1H), 7.10 (d,  $J = 7.2$  Hz, 2H), 7.16 (t,  $J = 7.8$  Hz, 1H), 7.25 (t,  $J = 7.8$  Hz, 2H), 7.37 (d,  $J = 3.6$  Hz, 1H), 7.79 (t,  $J = 5.4$  Hz, 1H), 8.55 (s, 1H), 10.35 (s, 1H);  $^{13}\text{C}$  NMR (150 MHz,  $\text{DMSO-d}_6$ )  $\delta$ : 22.6, 22.8, 25.1, 30.9, 32.5, 34.8, 40.4, 45.1, 47.2, 54.2, 63.5, 101.7, 106.1, 110.5, 111.3, 126.0, 127.3, 128.3, 128.5, 129.9, 135.1, 139.6, 150.4, 171.8, 173.2 ppm. SFCMS (APCI,  $m/z$ ):  $[M]^+$  calc.: 473.58; found: 473.24.

**1-((5S)-4-oxo-2,3,4,5,6,11-hexahydro-1H-1,5-epiminoazocino[4,5-b]indol-12-yl)-N-**

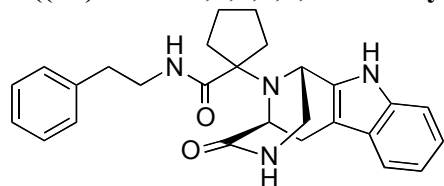

**phenethylcyclopentanecarboxamide [23]:** Purified by SFC ( $\text{CO}_2/\text{MeOH}$ ); Yield 27% (60 mg) as a light yellowish solid;  $^1\text{H}$  NMR (600 MHz,  $\text{DMSO-d}_6$ )  $\delta$ : 1.34-1.40 (m, 1H), 1.44-1.52 (m, 2H), 1.53-1.59 (m, 2H), 1.77-1.83 (m, 1H), 1.88-1.93 (m, 1H), 1.97-2.02 (m, 1H), 2.61 (t,  $J = 7.8$  Hz, 2H), 2.72 (d,  $J = 15.6$  Hz, 1H), 2.90 (dd,  $J = 15.0, 5.4$

Hz, 1H), 3.01 (dd,  $J = 11.4, 3.0$  Hz, 1H), 3.21 (q,  $J = 13.8, 6.6$  Hz, 2H), 3.57 (dd,  $J = 11.4, 4.8$  Hz, 1H), 3.85 (d,  $J = 5.4$  Hz, 1H), 4.19 (d,  $J = 3.0$  Hz, 1H), 6.94 (t,  $J = 7.2$  Hz, 1H), 7.03 (t,  $J = 7.2$  Hz, 1H), 7.10 (d,  $J = 7.2$  Hz, 2H), 7.16 (t,  $J = 7.2$  Hz, 1H), 7.25 (t,  $J = 7.8$  Hz, 2H), 7.30 (d,  $J = 8.4$  Hz, 1H), 7.35 (d,  $J = 7.8$  Hz, 1H), 7.43 (d,  $J = 3.0$  Hz, 1H), 7.85 (t,  $J = 5.4$  Hz, 1H), 10.74 (s, 1H);  $^{13}\text{C}$  NMR (150 MHz,  $\text{DMSO-d}_6$ )  $\delta$ : 23.2, 23.3, 24.6, 31.6, 33.6, 34.9, 40.5, 46.9, 47.1,

55.5, 73.4, 107.0, 111.2, 117.5, 118.5, 120.7, 126.0, 126.5, 128.3, 128.5, 134.1, 135.5, 139.5, 171.5, 174.4 ppm. SFCMS (APCI,  $m/z$ ):  $[M]^+$  calc.: 443.55; found: 443.24.

**1-((5S)-8-hydroxy-4-oxo-2,3,4,5,6,11-hexahydro-1H-1,5-epiminoazocino[4,5-b]indol-12-yl)-**

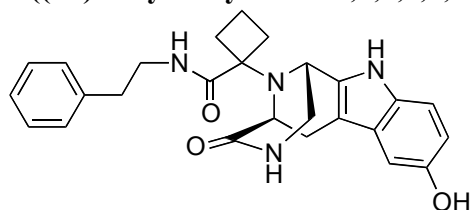

**N-phenethylcyclobutane-carboxamide [24]:** Purified by SFC ( $\text{CO}_2/\text{MeOH}$ ); Yield 35% (77 mg) as a light brownish solid;  $^1\text{H}$  NMR (600 MHz,  $\text{DMSO-d}_6$ )  $\delta$ : 1.45-1.54 (m, 2H), 2.08-2.22 (m, 4H), 2.61-2.72 (m, 3H), 2.84 (dd,  $J = 15.0, 4.8$  Hz, 1H), 3.01 (d,  $J = 8.4$  Hz, 1H), 3.24-3.33 (m, 2H), 3.53 (dd,  $J = 11.4, 3.0$  Hz, 1H), 3.79 (d,  $J = 4.8$  Hz, 1H), 4.12 (s, 1H), 6.54 (dd,  $J = 9.0, 2.4$  Hz,

1H), 6.66 (s, 1H), 7.09 (dd,  $J = 9.0, 1.8$  Hz, 1H), 7.14-7.19 (m, 3H), 7.25 (t,  $J = 7.2$  Hz, 2H), 7.48 (s, 1H), 7.83 (t,  $J = 4.2$  Hz, 1H), 8.62 (brs, 1H), 10.42 (s, 1H);  $^{13}\text{C}$  NMR (150 MHz,  $\text{DMSO-d}_6$ )  $\delta$ : 13.8, 24.8, 28.4, 29.0, 35.0, 40.5, 46.2, 46.8, 55.0, 66.6, 101.8, 106.2, 110.8, 111.5, 126.1, 127.1, 128.4, 128.6, 130.0, 134.2, 139.5, 150.5, 171.5, 174.0 ppm. SFCMS (APCI,  $m/z$ ):  $[M]^+$  calc.: 445.53; found: 445.24.

**2-((5S)-4-oxo-2,3,4,5,6,11-hexahydro-1H-1,5-epiminoazocino[4,5-b]indol-12-yl)-N-**

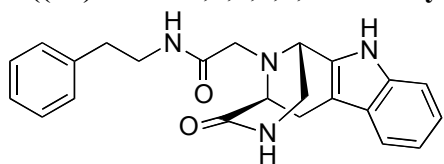

**phenethylacetamide [25]:** Purified by SFC ( $\text{CO}_2/\text{MeOH}$ ); Yield 28% (54 mg) as a light yellowish solid;  $^1\text{H}$  NMR (600 MHz,  $\text{DMSO-d}_6$ )  $\delta$ : 2.66 (d,  $J = 16.2$  Hz, 1H), 2.76 (t,  $J = 7.2$  Hz, 2H), 2.97 (dd,  $J = 15.6, 3.6$  Hz, 2H), 3.07 (dd,  $J = 11.4, 4.2$  Hz, 1H), 3.29 (dd,  $J = 15.6, 8.4$  Hz, 2H), 3.40-

3.46 (m, 1H), 3.56 (d,  $J = 5.4$  Hz, 1H), 3.67 (dd,  $J = 11.4, 4.2$  Hz, 1H), 3.95 (d,  $J = 4.2$  Hz, 1H), 6.97 (t,  $J = 7.2$  Hz, 1H), 7.03-7.09 (m, 2H), 7.22 (d,  $J = 7.2$  Hz, 2H), 7.29-7.34 (m, 3H), 7.40 (d,  $J = 7.8$  Hz, 1H), 7.57 (d,  $J = 3.6$  Hz, 1H), 7.91 (t,  $J = 6.0$  Hz, 1H), 10.79 (s, 1H);  $^{13}\text{C}$  NMR (150 MHz,  $\text{DMSO-d}_6$ )  $\delta$ : 21.7, 35.1, 40.0, 46.0, 49.7, 54.8, 58.4, 106.0, 111.2, 117.7, 118.6, 121.1, 126.1, 126.3, 128.4, 128.7, 131.4, 135.8, 139.4, 169.1, 170.7 ppm. SFCMS (APCI,  $m/z$ ):  $[M]^+$  calc.: 389.46; found: 389.19.

**1-((5S)-8-hydroxy-4-oxo-2,3,4,5,6,11-hexahydro-1H-1,5-epiminoazocino[4,5-b]indol-12-yl)-**

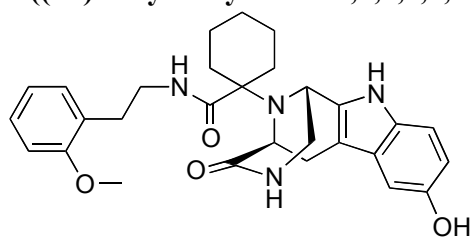

**N-phenethylcyclohexane-carboxamide [26]:** Purified by SFC ( $\text{CO}_2/\text{MeOH}$ ); Yield 44% (110 mg) as a light brownish solid;  $^1\text{H}$  NMR (600 MHz,  $\text{DMSO-d}_6$ )  $\delta$ : 1.07-1.13 (m, 2H), 1.26-1.30 (m, 1H), 1.36-1.49 (m, 3H), 1.51-1.56 (m, 1H), 1.59-1.64 (m, 1H), 1.84-1.92 (m, 2H), 2.59 (d,  $J = 15.0$  Hz, 1H), 2.61-2.69 (m, 2H), 2.85 (dd,  $J = 15.0, 5.4$  Hz, 1H), 2.98 (dd,  $J = 11.4, 3.6$  Hz, 1H),

3.12-3.17 (m, 2H), 3.49 (dd,  $J = 10.8, 4.2$  Hz, 1H), 3.76 (s, 3H) 3.93 (d,  $J = 5.4$  Hz, 1H), 4.21 (d,  $J = 3.6$  Hz, 1H), 6.52 (dd,  $J = 8.4, 2.4$  Hz, 1H), 6.63 (d,  $J = 2.4$  Hz, 1H), 6.84 (t,  $J = 7.2$  Hz, 1H), 6.92 (d,  $J = 8.4$  Hz, 1H), 7.03 (d,  $J = 7.2$  Hz, 1H), 7.06 (d,  $J = 8.4$  Hz, 1H), 7.17 (t,  $J = 8.4$  Hz, 1H), 7.38 (d,  $J = 3.6$  Hz, 1H), 7.77 (t,  $J = 5.4$  Hz, 1H), 8.56 (s, 1H), 10.36 (s, 1H);  $^{13}\text{C}$  NMR (150 MHz,  $\text{DMSO-d}_6$ )  $\delta$ : 22.7, 22.9, 24.9, 25.1, 29.6, 30.9, 32.4, 45.2, 47.2, 54.2, 55.2, 63.7, 101.7, 106.1, 110.6, 111.4, 120.3, 127.5, 129.8, 130.0, 135.2, 150.4, 157.2, 171.8, 173.3 ppm. SFCMS (APCI,  $m/z$ ):  $[M]^+$  calc.: 503.60; found: 503.28.

***N*-benzyl-1-((5*S*)-8-hydroxy-4-oxo-2,3,4,5,6,11-hexahydro-1*H*-1,5-epiminoazocino[4,5-*b*]-**

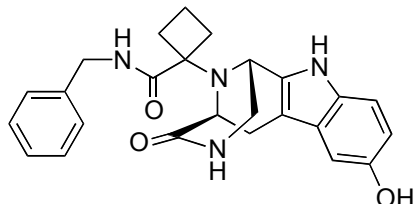

**indol-12-yl)cyclobutane-carboxamide [27]:** Purified by SFC (CO<sub>2</sub>/MeOH); Yield 29% (62 mg) as a light brownish solid; <sup>1</sup>H NMR (600 MHz, DMSO-*d*<sub>6</sub>) δ: 1.47-1.59 (m, 2H), 2.16-2.19 (m, 3H), 2.23-2.29 (m, 1H), 2.64 (d, *J* = 15.0 Hz, 1H), 2.87 (dd, *J* = 15.6, 6.0 Hz, 1H), 3.02 (dd, *J* = 10.8, 3.6 Hz, 1H), 3.57 (dd, *J* = 11.4, 4.2 Hz, 1H), 3.82 (d, *J* = 5.4 Hz, 1H), 4.14 (d, *J* = 3.6 Hz, 1H), 4.24 (dd, *J* = 15.0, 6.0 Hz, 1H),

4.31 (dd, *J* = 15.0, 6.6 Hz, 1H), 6.54 (dd, *J* = 8.4, 2.4 Hz, 1H), 6.66 (d, *J* = 1.8 Hz, 1H), 7.09 (d, *J* = 8.4 Hz, 1H), 7.20-7.24 (m, 3H), 7.29 (t, *J* = 7.2 Hz, 2H), 7.48 (d, *J* = 3.6 Hz, 1H), 8.38 (t, *J* = 6.0 Hz, 1H), 8.61 (s, 1H), 10.43 (s, 1H); <sup>13</sup>C NMR (150 MHz, DMSO-*d*<sub>6</sub>) δ: 13.3, 24.6, 28.3, 29.0, 42.5, 46.3, 46.6, 55.2, 66.8, 101.8, 106.2, 110.8, 111.5, 126.7, 127.1, 127.2, 128.3, 130.0, 134.2, 140.1, 150.5, 171.5, 174.2 ppm. SFCMS (APCI, *m/z*): [M]<sup>+</sup> calc.: 431.50; found: 431.20.

***N*-benzyl-2-((5*S*)-4-oxo-2,3,4,5,6,11-hexahydro-1*H*-1,5-epiminoazocino[4,5-*b*]indol-12-yl)-2-**

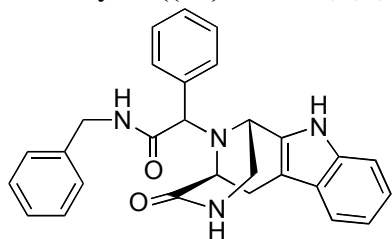

**phenylacetamide [28]:** Purified by column flash chromatography (CH<sub>2</sub>Cl<sub>2</sub>/MeOH); Yield 61% (137 mg) as a light yellowish solid; **Data for 1<sup>st</sup> diastereomer** (12.2% yield): <sup>1</sup>H NMR (600 MHz, DMSO-*d*<sub>6</sub>) δ: 2.56 (d, *J* = 15.6 Hz, 1H), 3.83 (dd, *J* = 16.2, 6.0 Hz, 1H), 3.15-3.17 (m, 1H), 3.28-3.31 (m, 1H), 3.77 (dd, *J* = 11.4, 4.8 Hz, 1H), 4.15 (d, *J* = 4.2 Hz, 1H), 4.21-4.25 (m, 3H), 6.97 (t, *J* = 7.8 Hz, 1H), 7.05-7.08 (m,

3H), 7.18-7.20 (m, 1H), 7.22-7.25 (m, 2H), 7.33-7.41 (m, 5H), 7.58 (d, *J* = 7.2 Hz, 2H), 7.65 (d, *J* = 3.6 Hz, 1H), 8.72 (t, *J* = 6.0 Hz, 1H), 10.85 (s, 1H); <sup>13</sup>C NMR (150 MHz, DMSO-*d*<sub>6</sub>) δ: 21.3, 41.9, 46.2, 48.3, 55.4, 68.9, 106.0, 111.3, 117.9, 118.7, 121.2, 126.4, 126.7, 126.9, 128.1, 128.3, 128.5, 128.6, 131.2, 135.8, 136.8, 139.4, 170.2, 170.6 ppm. SFCMS (APCI, *m/z*): [M]<sup>+</sup> calc.: 451.53; found: 451.19. **Data for 2<sup>nd</sup> diastereomer** (48.8% yield): <sup>1</sup>H NMR (600 MHz, DMSO-*d*<sub>6</sub>) δ: 2.75 (d, *J* = 16.2 Hz, 1H), 3.07 (dd, *J* = 11.4, 4.2 Hz, 1H), 3.11 (dd, *J* = 15.6, 5.4 Hz, 1H), 3.62 (dd, *J* = 11.4, 4.2 Hz, 1H), 3.81 (d, *J* = 6.0 Hz, 1H), 3.86 (d, *J* = 4.2 Hz, 1H), 4.18 (dd, *J* = 15.6, 6.0 Hz, 1H), 4.30 (dd, *J* = 15.0, 6.0 Hz, 1H), 4.32 (s, 1H), 6.97 (t, *J* = 7.8 Hz, 1H), 7.05 (t, *J* = 7.2 Hz, 1H), 7.09 (*J* = 7.2 Hz, 1H), 7.19-7.22 (m, 1H), 7.24-7.29 (m, 3H), 7.30-7.37 (m, 3H), 7.43 (d, *J* = 7.8 Hz, 1H), 7.48 (d, *J* = 6.6 Hz, 2H), 7.64 (d, *J* = 3.6 Hz, 1H), 8.89 (t, *J* = 6.0 Hz, 1H), 10.65 (s, 1H); <sup>13</sup>C NMR (150 MHz, DMSO-*d*<sub>6</sub>) δ: 21.4, 42.0, 46.5, 46.6, 56.3, 67.5, 106.2, 111.3, 117.8, 118.6, 121.1, 126.3, 126.8, 126.9, 128.1, 128.2, 128.3, 128.6, 131.2, 135.7, 138.2, 139.3, 169.5, 170.8 ppm. SFCMS (APCI, *m/z*): [M]<sup>+</sup> calc.: 451.53; found: 451.19.

***N*-benzyl-2-cyclopentyl-2-((5*S*)-8-hydroxy-4-oxo-2,3,4,5,6,11-hexahydro-1*H*-1,5-**

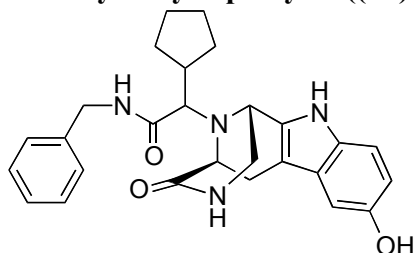

**epiminoazocino[4,5-*b*]indol-12-yl)acetamide [29]:** Purified by SFC (CO<sub>2</sub>/MeOH); Yield 38% (87 mg) as a brownish solid; **Data for 1<sup>st</sup> diastereomer** (7.6% yield): <sup>1</sup>H NMR (600 MHz, DMSO-*d*<sub>6</sub>) δ: 0.78-0.87 (m, 1H), 1.31-1.49 (m, 6H), 1.68-1.71 (m, 1H), 2.31-2.39 (m, 1H), 2.57 (d, *J* = 15.6 Hz, 1H), 2.92 (dd, *J* = 15.0, 5.4 Hz, 1H), 3.01-3.06 (m, 2H), 3.64 (dd, *J* = 11.4, 4.2 Hz, 1H), 3.76 (d, *J* = 5.4 Hz, 1H), 4.07-4.14

(m, 2H), 4.21 (d,  $J = 3.0$  Hz, 1H), 6.54 (dd,  $J = 8.4, 1.8$  Hz, 1H), 6.67(d,  $J = 1.8$  Hz, 1H), 7.07 (d,  $J = 8.4$  Hz, 1H), 7.12-7.15 (m, 2H), 7.19-7.26 (m, 3H), 7.44 (d,  $J = 3.0$  Hz, 1H), 8.37 (t,  $J = 5.4$  Hz, 1H), 8.60 (s, 1H), 10.42 (s, 1H);  $^{13}\text{C}$  NMR (150 MHz, DMSO- $d_6$ )  $\delta$ : 23.3, 24.7, 25.0, 27.6, 29.6, 42.1, 46.7, 48.0, 57.4, 67.5, 101.8, 105.5, 110.6, 111.4, 126.8, 127.3, 127.7, 128.2, 130.0, 133.7, 139.3, 150.4, 171.3, 171.5 ppm. SFCMS (APCI,  $m/z$ ):  $[\text{M}]^+$  calc.: 459.55; found: 459.24.

**Data for 2<sup>nd</sup> diastereomer** (30.4% yield):  $^1\text{H}$  NMR (600 MHz, DMSO- $d_6$ )  $\delta$ : 0.83-0.88 (m, 1H), 1.11-1.18 (m, 1H), 1.36-1.47 (m, 3H), 1.52-1.63 (m, 3H), 2.16-2.23 (m, 1H), 2.51 (d, 1H), 3.05-3.10 (m, 2H), 3.15 (d,  $J = 7.2$  Hz, 1H), 3.62 (d,  $J = 5.4$  Hz, 1H), 3.72 (dd,  $J = 12.0, 4.8$  Hz, 1H), 4.20-4.29 (m, 2H), 4.31 (d,  $J = 3.6$  Hz, 1H), 6.56 (dd,  $J = 8.4, 1.8$  Hz, 1H), 6.68 (d,  $J = 1.8$  Hz, 1H), 7.10 (d,  $J = 8.4$  Hz, 1H), 7.19-7.23 (m, 3H), 7.25-7.29 (m, 2H), 7.54 (d,  $J = 3.0$  Hz, 1H), 8.50 (t,  $J = 5.4$  Hz, 1H), 8.62 (s, 1H), 10.40 (s, 1H);  $^{13}\text{C}$  NMR (150 MHz, DMSO- $d_6$ )  $\delta$ : 21.7, 24.7, 25.0, 27.5, 29.8, 42.1, 46.6, 46.8, 56.7, 66.2, 101.9, 105.6, 110.9, 111.5, 126.8, 127.2, 127.4, 128.3, 130.1, 132.8, 139.5, 150.5, 171.1, 171.2 ppm. SFCMS (APCI,  $m/z$ ):  $[\text{M}]^+$  calc.: 459.55; found: 459.31.

***N*-(4-fluorobenzyl)-1-((5*S*)-8-hydroxy-4-oxo-2,3,4,5,6,11-hexahydro-1*H*-1,5-epiminoazocino-**

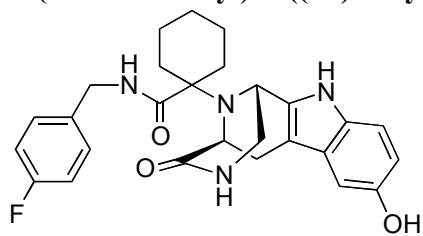

**[4,5-*b*]indol-12-yl)cyclohexane-carboxamide [30]:** Purified by SFC ( $\text{CO}_2/\text{MeOH}$ ); Yield 40% (95 mg) as a brownish solid;  $^1\text{H}$  NMR (600 MHz, DMSO- $d_6$ )  $\delta$ : 1.10-1.14 (m, 2H), 1.24-1.28 (m, 1H), 1.38-1.51 (m, 3H), 1.57-1.60 (m, 1H), 1.63-1.68 (m, 1H), 1.86-1.89 (m, 1H), 1.98-2.02 (m, 1H), 2.59 (d,  $J = 15.0$  Hz, 1H), 2.84 (dd,  $J = 15.0, 5.4$  Hz, 1H), 2.94 (dd,  $J = 10.8, 3.6$  Hz, 1H), 3.38 (dd,  $J = 11.4, 4.2$  Hz,

1H), 3.93 (d,  $J = 5.4$  Hz, 1H), 4.10-4.21 (m, 2H), 6.53 (d,  $J = 8.4$  Hz, 1H), 6.64 (s, 1H), 7.07 (d,  $J = 8.4$  Hz, 1H), 7.08 (t,  $J = 9.0$  Hz, 2H), 7.25 (t,  $J = 5.4$  Hz, 2H), 7.34 (d,  $J = 3.6$  Hz, 1H), 8.30 (t,  $J = 6.0$  Hz, 1H), 8.56 (s, 1H), 10.37 (s, 1H);  $^{13}\text{C}$  NMR (150 MHz, DMSO- $d_6$ )  $\delta$ : 22.8, 23.0, 24.8, 25.0, 30.9, 32.2, 41.7, 45.2, 47.2, 54.2, 64.0, 101.7, 106.1, 110.6, 111.4, 114.7, 114.9, 127.3, 129.3, 129.4, 129.9, 135.1, 136.3, 136.4, 150.4, 171.7, 173.7 ppm. SFCMS (APCI,  $m/z$ ):  $[\text{M}]^+$  calc.: 477.54; found: 477.23.

***N*-benzhydryl-2-((5*S*)-8-hydroxy-4-oxo-2,3,4,5,6,11-hexahydro-1*H*-1,5-epiminoazocino[4,5-*b*]indol-12-yl)-2-methylpropanamide [31]:** Purified by SFC

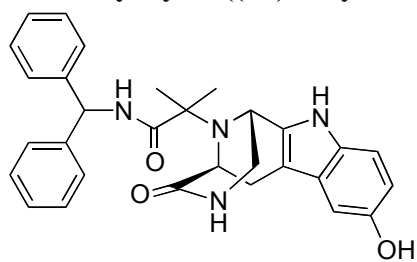

( $\text{CO}_2/\text{MeOH}$ ); Yield 27% (66 mg) as a light yellowish solid;  $^1\text{H}$  NMR (600 MHz, DMSO- $d_6$ )  $\delta$ : 0.96 (s, 3H), 1.34 (s, 3H), 2.61 (d,  $J = 15.0$  Hz, 1H), 2.73 (dd,  $J = 15.6, 5.4$  Hz, 1H), 2.88 (dd,  $J = 10.8, 3.6$  Hz, 1H), 3.22 (dd,  $J = 11.4, 4.2$  Hz, 1H), 3.84 (t,  $J = 4.8$  Hz, 2H), 6.14 (d,  $J = 8.4$  Hz, 1H), 6.53 (dd,  $J = 8.4, 2.4$  Hz, 1H), 6.62 (d,  $J = 2.4$  Hz, 1H), 7.06 (d,  $J = 8.4$  Hz, 1H), 7.21-7.25 (m, 1H), 7.28-7.34 (m, 10H), 8.59

(brs, 1H), 8.69 (d,  $J = 9.0$  Hz, 1H), 10.36 (s, 1H);  $^{13}\text{C}$  NMR (150 MHz, DMSO- $d_6$ )  $\delta$ : 20.4, 24.3, 24.6, 46.8, 54.8, 54.9, 56.3, 62.8, 101.8, 106.1, 110.8, 111.5, 126.8, 126.9, 127.2, 127.3, 127.8, 128.3, 128.6, 129.9, 134.4, 142.4, 142.6, 150.4, 171.7, 175.3 ppm. SFCMS (APCI,  $m/z$ ):  $[\text{M}]^+$  calc.: 495.58; found: 495.23.

**2-(2-((5S)-8-hydroxy-4-oxo-2,3,4,5,6,11-hexahydro-1H-1,5-epiminoazocino[4,5-b]indol-12-**

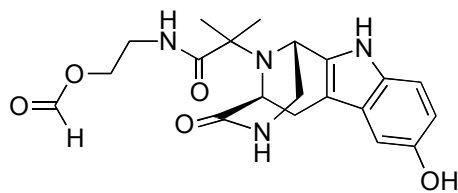

**yl)-2-methylpropanamido)ethyl formate [32]:** Purified by SFC (CO<sub>2</sub>/MeOH); Yield 51% (102 mg) as a light brownish solid; <sup>1</sup>H NMR (600 MHz, DMSO-d<sub>6</sub>) δ: 0.95 (s, 3H), 1.27 (s, 3H), 2.66 (d, *J* = 15.6 Hz, 1H), 2.87 (dd, *J* = 15.6, 6.0 Hz, 1H), 3.03 (dd, *J* = 11.4, 3.6 Hz, 1H), 3.24-3.30 (m, 1H), 3.45-3.51 (m, 1H), 3.68 (dd, *J* = 11.4, 4.2 Hz, 1H), 3.78 (d, *J* = 6.0 Hz, 1H), 3.87 (d, *J* = 3.6 Hz, 1H), 4.11-4.18 (m, 2H), 6.54 (dd, *J* = 9.0, 2.4 Hz, 1H), 6.66 (d, *J* = 1.8 Hz, 1H), 7.08 (d, *J* = 8.4 Hz, 1H), 7.50 (d, *J* = 3.6 Hz, 1H), 8.17 (t, *J* = 6.0 Hz, 1H), 8.22 (s, 1H), 10.40 (s, 1H); <sup>13</sup>C NMR (150 MHz, DMSO-d<sub>6</sub>) δ: 20.3, 24.6, 24.7, 37.9, 46.9, 54.9, 59.7, 62.2, 62.7, 101.8, 106.1, 110.8, 111.5, 127.2, 130.0, 134.4, 150.5, 162.1, 171.6, 176.4 ppm. SFCMS (APCI, *m/z*): [M]<sup>+</sup> calc.: 401.43; found 401.17.

**N-(3-(diethylamino)propyl)-1-((5S)-4-oxo-2,3,4,5,6,11-hexahydro-1H-1,5-epiminoazocino-**

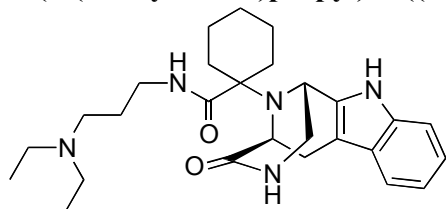

**[4,5-b]indol-12-yl)cyclohexanecarboxamide [33]:** Purified by SFC (CO<sub>2</sub>/MeOH); Yield 25% (58 mg) as a light yellowish solid; <sup>1</sup>H NMR (600 MHz, DMSO-d<sub>6</sub>) δ: 0.90 (t, *J* = 7.2 Hz, 6H), 1.14-1.19 (m, 2H), 1.35-1.46 (m, 6H), 1.57-1.64 (m, 2H), 1.86-1.94 (m, 2H), 2.28 (t, *J* = 7.2 Hz, 2H), 2.38 (q, *J* = 14.4, 7.2 Hz, 4H), 2.70 (d, *J* = 15.0 Hz, 1H), 2.93-2.97 (m, 3H), 3.04 (dd, *J* = 10.8, 3.6 Hz, 1H), 3.57 (dd, *J* = 11.4, 4.8 Hz, 1H), 3.95 (d, *J* = 5.4 Hz, 1H), 4.31 (d, *J* = 4.2 Hz, 1H), 6.92 (t, *J* = 7.2 Hz, 1H), 7.01 (t, *J* = 7.8 Hz, 1H), 7.38 (d, *J* = 3.6 Hz, 1H), 7.80 (t, *J* = 5.4 Hz, 1H), 10.75 (s, 1H); <sup>13</sup>C NMR (150 MHz, DMSO-d<sub>6</sub>) δ: 11.5, 22.8, 23.0, 24.8, 25.1, 26.3, 31.0, 32.5, 37.9, 45.0, 46.1, 47.3, 50.5, 54.2, 63.6, 101.5, 106.9, 111.1, 117.4, 118.3, 120.6, 126.6, 134.6, 135.4, 171.7, 172.9 ppm. SFCMS (APCI, *m/z*): [M]<sup>+</sup> calc.: 466.63; found: 466.31.

**N-(cyclopropylmethyl)-1-((5S)-4-oxo-2,3,4,5,6,11-hexahydro-1H-1,5-epiminoazocino[4,5-**

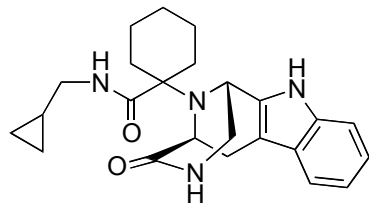

**b]indol-12-yl)cyclohexanecarboxamide [34]:** Purified by SFC (CO<sub>2</sub>/MeOH); Yield 19% (38 mg) as a light yellowish solid; <sup>1</sup>H NMR (600 MHz, DMSO-d<sub>6</sub>) δ: 0.11-0.14 (m, 2H), 0.29-0.35 (m, 2H), 0.83-0.86 (m, 1H), 1.14-1.66 (m, 8H), 1.86-1.95 (m, 2H), 2.72 (d, *J* = 15.6 Hz, 1H), 2.80-2.88 (m, 2H), 2.96 (dd, *J* = 15.6, 5.4 Hz, 1H), 3.04 (d, *J* = 11.4 Hz, 1H), 3.63 (dd, *J* = 10.8, 4.2 Hz, 1H), 3.99 (d, *J* = 4.8 Hz, 1H), 4.29 (s, 1H), 6.93 (t, *J* = 7.2 Hz, 1H), 7.01 (t, *J* = 7.2 Hz, 1H), 7.28 (d, *J* = 7.8 Hz, 1H), 7.33 (d, *J* = 7.8 Hz, 1H), 7.37 (d, *J* = 3.0 Hz, 1H), 7.82 (t, *J* = 5.4 Hz, 1H), 10.73 (s, 1H); <sup>13</sup>C NMR (150 MHz, DMSO-d<sub>6</sub>) δ: 3.2, 3.2, 10.9, 22.7, 23.0, 24.9, 25.1, 31.0, 32.4, 43.1, 45.1, 47.2, 54.2, 63.8, 107.0, 111.1, 117.4, 118.3, 120.6, 126.6, 134.6, 135.4, 171.7, 173.2 ppm. SFCMS (APCI, *m/z*): [M]<sup>+</sup> calc.: 407.52; found: 407.22.

**N-cyclohexyl-1-((5S)-8-hydroxy-4-oxo-2,3,4,5,6,11-hexahydro-1H-1,5-epiminoazocino[4,5-**

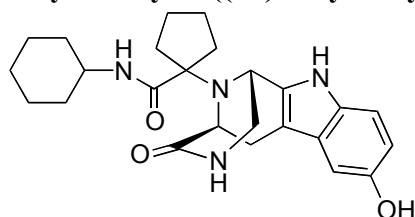

**b]indol-12-yl)cyclopentane-carboxamide [35]:** Purified by SFC (CO<sub>2</sub>/MeOH); Yield 24% (52 mg) as a light yellowish solid; <sup>1</sup>H NMR (600 MHz, DMSO-d<sub>6</sub>) δ: 1.04-1.08 (m, 1H)



1.12-1.22 (m, 4H), 1.36-1.42 (m, 1H), 1.45-1.55 (m, 5H), 1.57-1.65 (m, 4H), 1.76-1.83 (m, 1H), 1.89-1.93 (m, 1H), 1.98-2.02 (m, 1H), 2.63 (d,  $J = 15.0$  Hz, 1H), 2.83 (dd,  $J = 15.6, 5.4$  Hz, 1H), 3.02 (dd,  $J = 11.4, 4.2$  Hz, 1H), 3.83 (d,  $J = 5.4$  Hz, 1H), 4.11 (d,  $J = 3.6$  Hz, 1H), 6.53 (dd,  $J = 8.4, 2.4$  Hz, 1H), 6.64 (d,  $J = 1.8$  Hz, 1H), 7.07 (d,  $J = 9.0$  Hz, 1H), 7.41 (d,  $J = 4.2$  Hz, 1H), 7.47 (d,  $J = 8.4$  Hz, 1H), 8.58 (s, 1H), 10.38 (s, 1H);  $^{13}\text{C}$  NMR (150 MHz, DMSO- $d_6$ )  $\delta$ : 23.3, 23.4, 24.8, 24.9, 25.2, 31.4, 32.1, 32.2, 33.5, 47.0, 47.1, 47.8, 55.4, 73.5, 101.8, 106.2, 110.7, 111.4, 127.2, 129.9, 134.6, 150.4, 171.6, 173.5 ppm. SFCMS (APCI,  $m/z$ ):  $[\text{M}]^+$  calc.: 437.55; found: 437.26.

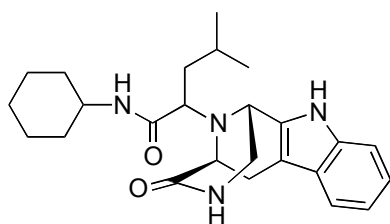

***N*-cyclohexyl-4-methyl-2-((5*S*)-4-oxo-2,3,4,5,6,11-hexahydro-1*H*-1,5-epiminoazocino[4,5-*b*]indol-12-yl)pentanamide [36]:**

Purified by SFC ( $\text{CO}_2/\text{MeOH}$ ); Yield 52% (109 mg) as a light yellowish solid; **Data for 1<sup>st</sup> diastereomer** (11.3% yield):  $^1\text{H}$  NMR (600 MHz, DMSO- $d_6$ )  $\delta$ : 0.83-0.86 (m, 6H), 1.04-1.23 (m, 5H), 1.45-1.68 (m, 8H), 2.68 (d,  $J = 15.6$  Hz, 1H), 2.92 (dd,  $J = 15.6, 5.4$  Hz, 1H), 3.07-3.13 (m, 2H), 3.46-3.52 (m, 1H), 3.59 (dd,  $J = 15.6, 4.2$  Hz,

1H), 3.78 (d,  $J = 4.8$  Hz, 1H), 4.05 (d,  $J = 3.6$  Hz, 1H), 6.95 (t,  $J = 7.8$  Hz, 1H), 7.03 (t,  $J = 7.8$  Hz, 1H), 7.30 (d,  $J = 7.8$  Hz, 1H), 7.37 (d,  $J = 7.8$  Hz, 1H), 7.56 (d,  $J = 3.6$  Hz, 1H), 7.76 (d,  $J = 8.4$  Hz, 1H), 10.78 (s, 1H);  $^{13}\text{C}$  NMR (150 MHz, DMSO- $d_6$ )  $\delta$ : 21.8, 21.9, 24.0, 24.6, 24.7, 24.8, 25.2, 32.2, 32.3, 46.6, 47.2, 48.1, 55.9, 62.3, 106.3, 111.2, 117.7, 118.5, 120.9, 126.5, 132.2, 135.6, 170.9, 171.0 ppm. SFCMS (APCI,  $m/z$ ):  $[\text{M}]^+$  calc.: 423.56; found: 423.32. **Data for 2<sup>nd</sup> diastereomer** (40.7% yield):  $^1\text{H}$  NMR (600 MHz, DMSO- $d_6$ )  $\delta$ : 0.77 (d,  $J = 6.0$  Hz, 3H), 0.81 (d,  $J = 6.6$  Hz, 3H), 1.06-1.19 (m, 3H), 1.20-1.29 (m, 2H), 1.33-1.41 (m, 2H), 1.53-1.61 (m, 2H), 1.64-1.72 (m, 4H), 2.63 (d,  $J = 15.0$  Hz, 1H), 3.08-3.17 (m, 3H), 3.57-3.61 (m, 1H), 3.63 (d,  $J = 6.0$  Hz, 1H), 3.67 (dd,  $J = 11.4, 4.8$  Hz, 1H), 4.31 (d,  $J = 4.2$  Hz, 1H), 6.96 (t,  $J = 7.2$  Hz, 1H), 7.04 (t,  $J = 7.2$  Hz, 1H), 7.31 (d,  $J = 8.4$  Hz, 1H), 7.39 (d,  $J = 7.6$  Hz, 1H), 7.55 (d,  $J = 3.6$  Hz, 1H), 7.99 (d,  $J = 8.4$  Hz, 1H), 10.76 (s, 1H);  $^{13}\text{C}$  NMR (150 MHz, DMSO- $d_6$ )  $\delta$ : 22.0, 22.1, 24.0, 24.7, 25.0, 25.2, 32.3, 32.4, 46.1, 46.7, 47.4, 48.7, 56.7, 61.4, 106.5, 111.3, 117.8, 118.5, 121.0, 126.5, 132.2, 135.7, 170.3, 171.1 ppm. SFCMS (APCI,  $m/z$ ):  $[\text{M}]^+$  calc.: 423.56; found: 423.32.

**1-((5*S*)-8,9-dimethoxy-4-oxo-1,2,3,4,5,6-hexahydro-1,5-epiminobenzo[*d*]azocin-11-yl)-*N*-phenethylcyclobutanecarboxamide [40]:**

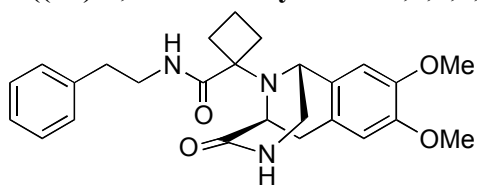

Purified by column flash chromatography (Hexanes/EtOAc); Yield 64% (143 mg) as a light yellowish solid;  $^1\text{H}$  NMR (600 MHz, DMSO- $d_6$ )  $\delta$ : 1.46-1.57 (m, 2H), 2.08-2.14 (m, 2H), 2.16-2.22 (m, 2H), 2.63-2.75 (m, 3H), 2.91-2.97 (m, 2H), 3.25-3.34 (m, 2H), 3.56 (dd,  $J = 11.4, 4.2$  Hz,

1H), 3.64 (d,  $J = 6.0$  Hz, 1H), 3.69 (s, 3H), 3.71 (s, 3H), 4.08 (d,  $J = 3.6$  Hz, 1H), 6.63 (s, 1H), 6.80 (s, 1H), 7.17-7.20 (m, 3H), 7.26 (t,  $J = 7.8$  Hz, 2H), 7.50 (d,  $J = 3.0$  Hz, 1H), 7.75 (t,  $J = 5.4$  Hz, 1H);  $^{13}\text{C}$  NMR (150 MHz, DMSO- $d_6$ )  $\delta$ : 13.7, 28.3, 29.2, 30.8, 35.0, 40.4, 48.3, 49.6, 54.1, 55.4, 55.5, 66.7, 110.1, 111.4, 125.8, 126.1, 128.3, 128.6, 129.3, 139.5, 147.2, 147.7, 171.1, 173.9 ppm. SFCMS (APCI,  $m/z$ ):  $[\text{M}]^+$  calc.: 450.54; found: 450.21.

**4-((5*S*)-8,9-dimethoxy-4-oxo-1,2,3,4,5,6-hexahydro-1,5-epiminobenzo[*d*]azocin-11-yl)-*N*-phenethyltetrahydro-2*H*-pyran-4-carboxamide [41]:**

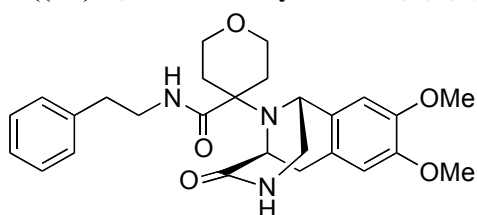

Purified by column flash chromatography

(Hexanes/EtOAc); Yield 59% (141 mg) as a light yellowish solid;  $^1\text{H}$  NMR (600 MHz, DMSO- $d_6$ )  $\delta$ : 1.54-1.58 (m, 1H), 1.75-1.78 (m, 1H), 1.91-1.94 (m, 2H), 2.61-2.68 (m, 3H), 2.91-2.99 (m, 2H), 3.10 (t,  $J = 10.8$  Hz, 1H), 3.13-3.25 (m, 2H), 3.37 (t,  $J = 10.2$  Hz, 1H), 3.61 (dd,  $J = 11.4$ , 4.8 Hz, 2H), 3.65-3.67 (m, 1H), 3.68 (s, 3H), 3.70 (s, 3H), 3.81 (d,  $J = 6.0$  Hz, 1H), 4.21 (d,  $J = 3.6$  Hz, 1H), 6.61 (s, 1H), 6.79 (s, 1H), 7.16-7.20 (m, 3H), 7.27 (t,  $J = 7.8$  Hz, 2H), 7.43 (d,  $J = 3.6$  Hz, 1H), 7.88 (t,  $J = 5.4$  Hz, 1H);  $^{13}\text{C}$  NMR (150 MHz, DMSO- $d_6$ )  $\delta$ : 30.6, 31.9, 32.8, 34.7, 40.5, 48.4, 48.6, 53.2, 55.4, 55.5, 61.4, 63.7, 64.5, 110.1, 111.5, 125.7, 126.1, 128.3, 128.6, 129.8, 139.5, 147.1, 147.6, 171.1, 172.5 ppm. SFCMS (APCI,  $m/z$ ):  $[\text{M}]^+$  calc.: 480.57; found: 480.21.

**1-((5S)-8,9-dimethoxy-4-oxo-1,2,3,4,5,6-hexahydro-1,5-epiminobenzo[d]azocin-11-yl)-N-(2-methoxyphenethyl)cyclopentane-carboxamide [42]:**

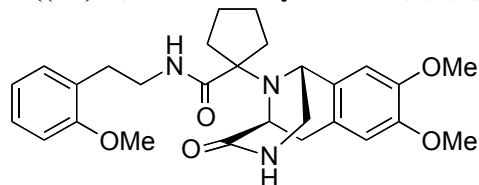

Purified by column flash chromatography (Hexanes/EtOAc); Yield 62% (153 mg) as a light yellowish solid;  $^1\text{H}$  NMR (600 MHz, DMSO- $d_6$ )  $\delta$ : 1.36-1.42 (m, 1H), 1.46-1.53 (m, 3H), 1.54-1.59 (m, 1H), 1.71-1.76 (m, 1H), 1.85-1.90 (m, 1H), 1.99-2.04 (m, 1H), 2.59-2.71 (m, 3H), 2.89-2.93 (m, 2H), 3.20 (q,  $J = 14.4$ , 7.8 Hz, 2H), 3.57 (dd,  $J = 12.0$ , 4.8 Hz, 1H), 3.62 (d,  $J = 6.0$  Hz, 1H), 3.68 (s, 3H), 3.70 (s, 3H), 3.75 (s, 3H), 4.04 (d,  $J = 3.6$  Hz, 1H), 6.60 (s, 1H), 6.79 (s, 1H), 6.84 (t,  $J = 7.2$  Hz, 1H), 6.93 (d,  $J = 8.4$  Hz, 1H), 7.08 (d,  $J = 7.2$  Hz, 1H), 7.18 (t,  $J = 9.0$  Hz, 1H), 7.43 (d,  $J = 3.6$  Hz, 1H), 7.72 (t,  $J = 6.0$  Hz, 1H);  $^{13}\text{C}$  NMR (150 MHz, DMSO- $d_6$ )  $\delta$ : 23.4, 33.6, 29.6, 30.8, 32.1, 33.4, 40.0, 48.5, 50.3, 54.8, 55.2, 55.4, 55.5, 73.3, 110.1, 110.6, 111.4, 120.3, 125.7, 127.3, 127.6, 129.7, 129.9, 147.1, 147.6, 157.2, 171.2, 174.6 ppm. SFCMS (APCI,  $m/z$ ):  $[\text{M}]^+$  calc.: 494.59; found: 494.25.

**N-benzyl-1-((1R,5S)-8-methoxy-4-oxo-1,2,3,4,5,6-hexahydro-1,5-epiminobenzo[d]azocin-11-yl)cycloheptanecarboxamide [43]:**

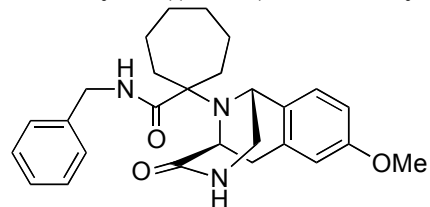

Purified by SFC ( $\text{CO}_2/\text{MeOH}$ ); Yield 35% (78 mg) as a light yellowish solid;  $^1\text{H}$  NMR (600 MHz,  $\text{CDCl}_3$ )  $\delta$ : 1.34-1.48 (m, 3H), 1.55-1.75 (m, 6H), 1.90-1.98 (m, 2H), 2.24 (dd,  $J = 13.8$ , 8.4 Hz, 1H), 2.85 (d,  $J = 16.8$  Hz, 1H), 3.01 (dd,  $J = 11.4$ , 3.6 Hz, 1H), 3.05 (dd,  $J = 17.4$ , 6.6 Hz, 1H), 3.60 (dd,  $J = 11.4$ , 4.8 Hz, 1H), 3.75 (s, 3H), 3.84 (d,  $J = 6.6$  Hz, 1H), 3.97 (d,  $J = 4.2$  Hz, 1H), 4.32 (d,  $J = 14.4$  Hz, 1H), 4.46 (d,  $J = 14.4$  Hz, 1H), 6.28 (s, 1H), 6.54 (d,  $J = 2.4$  Hz, 1H), 6.72 (dd,  $J = 8.4$ , 2.4 Hz, 1H), 6.90 (d,  $J = 8.4$  Hz, 1H), 7.23-7.33 (m, 6H);  $^{13}\text{C}$  NMR (150 MHz,  $\text{CDCl}_3$ )  $\delta$ : 24.2, 24.8, 30.3, 30.4, 31.8, 33.6, 36.5, 43.3, 49.8, 50.3, 54.4, 55.2, 70.1, 113.2, 127.1, 127.5, 127.8, 128.7, 129.3, 134.5, 138.8, 158.6, 172.7, 176.5 ppm. SFCMS (APCI,  $m/z$ ):  $[\text{M}]^+$  calc.: 448.57; found: 448.25.

**N-benzyl-1-((5S)-8,9-dimethoxy-4-oxo-1,2,3,4,5,6-hexahydro-1,5-epiminobenzo[d]azocin-11-yl)cyclopentanecarboxamide [44]:**

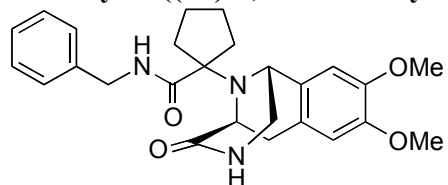

Purified by column flash chromatography (Hexanes/EtOAc); Yield 72% (161 mg) as a light yellowish solid;  $^1\text{H}$  NMR (600 MHz, DMSO- $d_6$ )  $\delta$ : 1.39-1.46 (m, 1H), 1.48-1.56 (m, 2H), 1.58-1.63 (m, 2H), 1.74-1.79 (m, 1H), 1.97-2.02 (m, 1H), 2.04-2.09 (m, 1H), 2.63 (d,  $J = 16.2$  Hz, 1H), 2.92-2.98 (m, 2H), 3.58-3.64 (m, 2H), 3.69 (s, 3H), 3.70 (s, 3H), 4.08 (d,  $J = 4.2$  Hz, 1H), 4.16 (dd,  $J = 15.0$ , 6.0 Hz,

1H), 4.27 (dd,  $J = 14.4, 6.0$  Hz, 1H), 6.61 (s, 1H), 6.77 (s, 1H), 7.20-7.23 (m, 3H), 7.27-7.31 (m, 2H), 7.42 (d,  $J = 3.6$  Hz, 1H), 8.26 (t,  $J = 6.0$  Hz, 1H);  $^{13}\text{C}$  NMR (150 MHz, DMSO- $d_6$ )  $\delta$ : 23.4, 23.7, 31.1, 32.5, 33.0, 42.5, 48.4, 50.4, 54.8, 55.4, 55.5, 73.8, 110.1, 111.4, 125.8, 126.7, 127.2, 128.2, 129.8, 140.1, 147.1, 147.6, 171.3, 174.9 ppm. SFCMS (APCI,  $m/z$ ):  $[\text{M}]^+$  calc.: 450.54; found: 450.21.

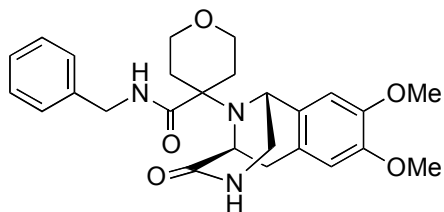

***N*-benzyl-4-((5*S*)-8,9-dimethoxy-4-oxo-1,2,3,4,5,6-hexahydro-1,5-epiminobenzo[*d*]azocin-11-yl)tetrahydro-2*H*-pyran-4-carboxamide [45]:** Purified by SFC ( $\text{CO}_2/\text{MeOH}$ ); Yield 49% (114 mg) as a light yellowish solid;  $^1\text{H}$  NMR (600 MHz, DMSO- $d_6$ )  $\delta$ : 1.55-1.60 (m, 1H), 1.81-1.86 (m, 1H), 1.96-1.99 (m, 1H), 2.01-2.05 (m, 1H), 2.63 (d,  $J = 16.2$  Hz, 1H), 2.92-2.97 (m, 2H), 3.21 (t,  $J = 10.8$  Hz, 1H), 3.43 (td,  $J = 11.4, 1.8$  Hz, 1H),

3.57 (dd,  $J = 12.0, 4.8$  Hz, 1H), 3.63-3.67 (m, 1H), 3.69 (s, 3H), 3.71 (s, 3H), 3.73-3.76 (m, 1H), 3.80 (d,  $J = 6.6$  Hz, 1H), 4.11 (dd,  $J = 14.4, 5.4$  Hz, 1H), 4.20 (d,  $J = 3.6$  Hz, 1H), 4.25 (dd,  $J = 15.0, 6.0$  Hz, 1H), 6.61 (s, 1H), 6.77 (s, 1H), 7.22-7.24 (m, 3H), 7.29-7.31 (m, 2H), 7.40 (d,  $J = 3.6$  Hz, 1H), 8.35 (t,  $J = 6.0$  Hz, 1H);  $^{13}\text{C}$  NMR (150 MHz, DMSO- $d_6$ )  $\delta$ : 30.7, 32.0, 32.6, 40.1, 42.5, 48.5, 53.2, 55.4, 55.5, 61.9, 63.9, 64.7, 110.0, 111.5, 125.6, 126.7, 127.4, 128.2, 129.8, 139.8, 147.1, 147.6, 171.1, 172.7 ppm. SFCMS (APCI,  $m/z$ ):  $[\text{M}]^+$  calc.: 466.54; found: 466.24.

***N*-(4-fluorobenzyl)-2-((1*R*,5*S*)-8-methoxy-4-oxo-1,2,3,4,5,6-hexahydro-1,5-epiminobenzo[*d*]azocin-11-yl)-2-methylpropanamide [46]:**

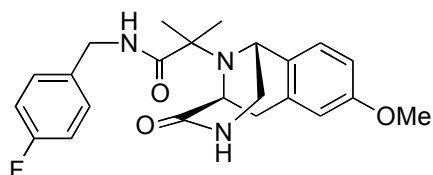

Purified by SFC ( $\text{CO}_2/\text{MeOH}$ ); Yield 44% (90 mg) as a light yellowish solid;  $^1\text{H}$  NMR (600 MHz,  $\text{CDCl}_3$ )  $\delta$ : 1.25 (s, 3H), 1.39 (s, 3H), 2.87 (d,  $J = 16.8$  Hz, 1H), 2.94 (dd,  $J = 16.8, 6.0$  Hz, 1H), 3.12 (dd,  $J = 11.4, 3.6$  Hz, 1H), 3.63 (dd,  $J = 12.0, 4.8$  Hz, 1H), 3.69 (d,  $J = 6.6$  Hz, 1H), 3.73 (s, 3H), 4.01 (d,  $J = 3.6$  Hz, 1H), 4.24 (dd,  $J = 15.0, 5.4$  Hz, 1H), 4.47 (dd,  $J = 15.0, 6.6$  Hz, 1H), 6.54 (d,  $J = 2.4$  Hz, 1H), 6.73 (dd,  $J = 8.4, 2.4$  Hz, 1H), 6.95 (d,  $J = 8.4$  Hz, 1H), 6.98-7.02 (m, 3H), 7.21 (dd,  $J = 8.4, 5.4$  Hz, 2H), 7.61 (t,  $J = 6.0$  Hz, 1H);  $^{13}\text{C}$  NMR (150 MHz,  $\text{CDCl}_3$ )  $\delta$ : 20.5, 25.1, 31.7, 42.7, 49.3, 50.2, 54.7, 55.1, 63.7, 113.1, 113.2, 115.4, 115.6, 127.2, 128.9, 129.2, 129.3, 134.1, 134.4, 134.5, 158.6, 161.2, 162.9, 172.8, 176.2 ppm. SFCMS (APCI,  $m/z$ ):  $[\text{M}]^+$  calc.: 412.47; found: 412.19.

**diethyl-((1-((5*S*)-8,9-dimethoxy-4-oxo-1,2,3,4,5,6-hexahydro-1,5-epiminobenzo[*d*]azocin-11-yl)cyclohexancarboxamido)-methyl)phosphonate [47]:**

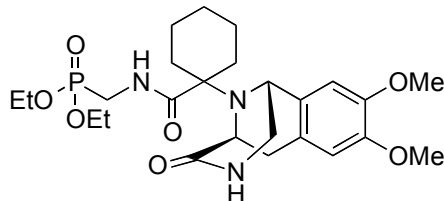

Purified by column flash chromatography ( $\text{Hexanes}/\text{EtOAc}$ ); Yield 76% (198 mg) as a light yellowish solid;  $^1\text{H}$  NMR (600 MHz, DMSO- $d_6$ )  $\delta$ : 1.11-1.29 (m, 9H), 1.42-1.47 (m, 2H), 1.53-1.63 (m, 3H), 1.91-1.98 (m, 2H), 2.59 (d,  $J = 16.2$  Hz, 1H), 2.93 (dd,  $J = 11.4, 3.6$  Hz, 1H), 3.01 (dd,  $J = 16.8, 6.6$  Hz, 1H), 3.44 (q,  $J = 10.8, 6.0$  Hz, 2H), 3.64 (dd,  $J = 12.0, 4.8$  Hz, 1H), 3.69 (s, 3H), 3.70 (s, 3H), 3.73 (d,  $J = 6.0$  Hz, 1H), 3.98-4.03 (m, 4H), 4.15 (d,  $J = 3.6$  Hz, 1H), 6.60 (s, 1H), 6.73 (s, 1H), 7.38 (d,  $J = 3.6$  Hz, 1H), 7.92 (t,  $J = 6.0$  Hz, 1H);  $^{13}\text{C}$  NMR (150 MHz, DMSO- $d_6$ )  $\delta$ : 16.2 (q), 22.5, 22.9, 25.0, 30.6, 31.2, 32.3, 33.6, 34.6, 48.7, 48.8,

53.5, 55.4, 55.5, 61.4 (q), 64.3, 109.9, 111.5, 125.8, 130.1, 147.0, 147.5, 171.4, 173.5 ppm. SFCMS (APCI,  $m/z$ ):  $[M]^+$  calc.: 524.56; found: 524.28.

***N*-cyclohexyl-1-((1*R*,5*S*)-8-methoxy-4-oxo-1,2,3,4,5,6-hexahydro-1,5-epiminobenzo[*d*]azocin-11-yl)cyclopentanecarboxamide [48]:** Purified by SFC (CO<sub>2</sub>/MeOH); Yield 47% (96 mg) as a colorless solid; <sup>1</sup>H NMR (600 MHz, CDCl<sub>3</sub>) δ: 0.97-1.12 (m, 3H), 1.26-1.35 (m, 2H), 1.55-1.73 (m, 8H), 1.78-1.85 (m, 3H), 1.94-1.99 (m, 1H), 2.07-2.10 (m, 1H), 2.92 (d,  $J$  = 16.8 Hz, 1H), 3.11 (d,  $J$  = 11.4 Hz, 1H), 3.65-3.70 (m, 1H), 3.74 (s, 3H), 3.76-3.80

(m, 1H), 3.82 (d,  $J$  = 6.6 Hz, 1H), 4.04 ( $J$  = 4.2 Hz, 1H), 6.58 (d,  $J$  = 1.8 Hz, 1H), 6.72 (dd,  $J$  = 8.4, 2.4 Hz, 1H), 6.94 (d,  $J$  = 8.4 Hz, 1H); <sup>13</sup>C NMR (150 MHz, CDCl<sub>3</sub>) δ: 24.8, 24.9, 25.0, 25.4, 32.3, 32.9, 33.0, 33.1, 33.5, 47.8, 49.2, 50.9, 54.5, 55.1, 74.5, 74.6, 113.0, 113.2, 127.2, 129.2, 134.6, 158.5, 172.9, 174.9 ppm. SFCMS (APCI,  $m/z$ ):  $[M]^+$  calc.: 412.54; found: 412.23.

***N*-cyclohexyl-2-((1*R*,5*S*)-8,9-dimethoxy-4-oxo-1,2,3,4,5,6-hexahydro-1,5-epiminobenzo[*d*]azocin-11-yl)-2-methylpropanamide [49]:** Purified by SFC (CO<sub>2</sub>/MeOH); Yield 52% (108 mg) as a light yellowish solid; <sup>1</sup>H NMR (600 MHz, DMSO-*d*<sub>6</sub>) δ: 1.01 (s, 3H), 1.09-1.30 (m, 8H), 1.54-1.76 (m, 5H), 2.68 (d,  $J$  = 16.8 Hz, 1H), 2.95 (dd,  $J$  = 16.8, 6.0 Hz, 1H), 3.00 (dd,  $J$  = 12.0,

4.2 Hz, 1H), 3.49-3.54 (m, 2H), 3.62 (dd,  $J$  = 12.0, 4.2 Hz, 1H), 3.70 (s, 3H), 3.71 (s, 3H), 3.95 (d,  $J$  = 3.6 Hz, 1H), 6.65 (s, 1H), 6.86 (s, 1H), 7.49 (d,  $J$  = 3.6 Hz, 1H), 7.62 (d,  $J$  = 9.0 Hz, 1H); <sup>13</sup>C NMR (150 MHz, DMSO-*d*<sub>6</sub>) δ: 20.4, 24.6, 24.7, 24.8, 25.2, 30.4, 32.2, 32.5, 47.6, 48.8, 49.9, 54.4, 55.4, 55.5, 62.5, 110.0, 111.5, 125.3, 129.7, 147.3, 147.6, 171.3, 174.6 ppm. SFCMS (APCI,  $m/z$ ):  $[M]^+$  calc.: 416.53; found: 416.22.

## 5. Single crystal X-Ray structure Determination of Product 32

### **General:**

The data was collected on a X-ray single crystal diffractometer equipped with a CCD detector (Bruker, APEX II,  $\kappa$ -CCD), a rotating anode (Bruker AXS, FR591) with MoK $_{\alpha}$  radiation ( $\lambda = 0.71073 \text{ \AA}$ ), and a graphite monochromator by using the SMART software package.<sup>[1]</sup> The measurement was performed on a single crystal coated with perfluorinated ether. The crystal was fixed on the top of a cactus brickle (*Opuntia ficus-india*), transferred to the diffractometer and frozen under a stream of cold nitrogen. A matrix scan, using three short runs, was used to determine the initial lattice parameters. Reflections were merged and corrected for Lorenz and polarization effects, scan speed, and background using SAINT.<sup>[2]</sup> Absorption corrections, including odd and even ordered spherical harmonics were performed using SADABS.<sup>[2]</sup> Space group assignments were based upon systematic absences, *E* statistics, and successful refinement of the structures. Structures were solved by direct methods with the aid of successive difference Fourier maps, and were refined against all data using WinGX<sup>[7]</sup> based on SIR-92.<sup>[3]</sup> Hydrogen atoms could be located in the difference Fourier maps and were allowed to refine freely. If not mentioned otherwise, non-hydrogen atoms were refined with anisotropic displacement parameters. Full-matrix least-squares refinements were carried out by minimizing  $\sum w(F_o^2 - F_c^2)^2$  with SHELXL-97<sup>[5]</sup> weighting scheme. Neutral atom scattering factors for all atoms and anomalous dispersion corrections for the non-hydrogen atoms were taken from *International Tables for Crystallography*.<sup>[4]</sup> Images of the crystal structures were generated by PLATON<sup>[6]</sup>. CCDC 928118 (**32**) contains the supplementary crystallographic data for this paper. These data can be obtained free of charge from The Cambridge Crystallographic Data Centre via [www.ccdc.cam.ac.uk/data\\_request/cif](http://www.ccdc.cam.ac.uk/data_request/cif) or [https://www.ccdc.cam.ac.uk/services/structure\\_deposit/](https://www.ccdc.cam.ac.uk/services/structure_deposit/)

## Single Crystal X-Ray Structure Determination of Product 32

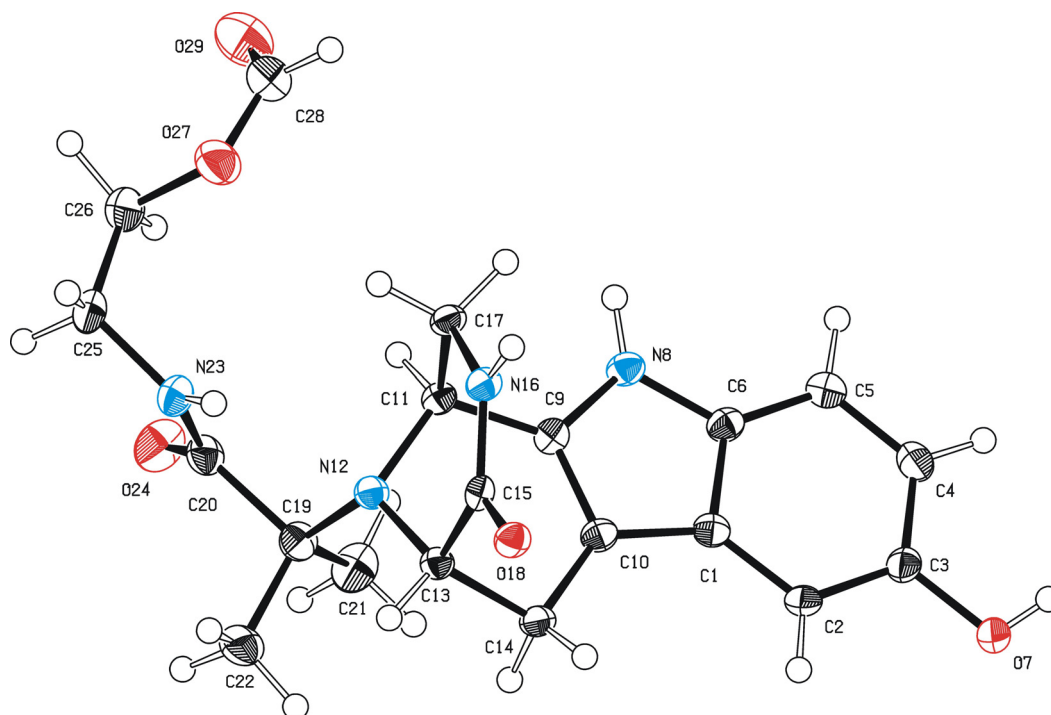

**Figure 1** – Ortep drawing of product **32** with 50% ellipsoids.<sup>[6]</sup>

|                       |                                                                                                                                                                                                                                                                                                                                                   |
|-----------------------|---------------------------------------------------------------------------------------------------------------------------------------------------------------------------------------------------------------------------------------------------------------------------------------------------------------------------------------------------|
| Operator:             | *** Herdtweck ***                                                                                                                                                                                                                                                                                                                                 |
| Molecular Formula:    | C <sub>20</sub> H <sub>24</sub> N <sub>4</sub> O <sub>5</sub>                                                                                                                                                                                                                                                                                     |
| Crystal Color / Shape | Colorless needle                                                                                                                                                                                                                                                                                                                                  |
| Crystal Size          | Approximate size of crystal fragment used for data collection:<br>0.05 × 0.10 × 0.53 mm                                                                                                                                                                                                                                                           |
| Molecular Weight:     | 400.43 a.m.u.                                                                                                                                                                                                                                                                                                                                     |
| F <sub>000</sub> :    | 848                                                                                                                                                                                                                                                                                                                                               |
| Systematic Absences:  | h00: h≠2n; 0k0: k≠2n, 00l: l≠2n                                                                                                                                                                                                                                                                                                                   |
| Space Group:          | Orthorhombic <i>P</i> 2 <sub>1</sub> 2 <sub>1</sub> 2 <sub>1</sub> (I.T.-No.: 19)                                                                                                                                                                                                                                                                 |
| Cell Constants:       | Least-squares refinement of 9717 reflections with the programs<br>"APEX suite" and "SAINT" [1,2]; theta range 2.41° < θ < 25.39°;<br>Mo(Kα); λ = 71.073 pm<br>a = 674.49(2) pm<br>b = 872.16(3) pm<br>c = 3350.58(11) pm<br>V = 1971.02(11) · 10 <sup>6</sup> pm <sup>3</sup> ; Z = 4; D <sub>calc</sub> = 1.349 g cm <sup>-3</sup> ; Mos. = 0.68 |
| Diffractometer:       | Kappa APEX II (Area Diffraction System; BRUKER AXS); rotating<br>anode; graphite monochromator; 50 kV; 40 mA; λ = 71.073 pm;<br>Mo(Kα)                                                                                                                                                                                                            |
| Temperature:          | (-150±1) °C; (123±1) K                                                                                                                                                                                                                                                                                                                            |
| Measurement Range:    | 2.41° < θ < 25.39°; h: -8/8, k: -10/10, l: -40/40                                                                                                                                                                                                                                                                                                 |

Measurement Time:  $2 \times 10$  s per film  
Measurement Mode: measured: 11 runs; 4951 films / scaled: 11 runs; 4951 films  
 $\varphi$ - and  $\omega$ -movement; Increment:  $\Delta\varphi/\Delta\omega = 0.50^\circ$ ; dx = 80.0 mm  
LP - Correction: Yes [2]  
Intensity Correction: No/Yes; during scaling [2]  
Absorption Correction: Multi-scan; during scaling;  $\mu = 0.099 \text{ mm}^{-1}$  [2]  
Correction Factors:  $T_{\min} = 0.6499$   $T_{\max} = 0.7452$   
Reflection Data: 35582 reflections were integrated and scaled  
120 reflections systematic absent and rejected  
35462 reflections to be merged  
3635 independent reflections  
0.029  $R_{\text{int}}$ : (basis  $F_o^2$ )  
3635 independent reflections (all) were used in refinements  
3539 independent reflections with  $I_o > 2\sigma(I_o)$   
100 % completeness of the data set  
358 parameter full-matrix refinement  
10.2 reflections per parameter  
Solution: Direct Methods [3]; Difference Fourier syntheses  
Refinement Parameters: In the asymmetric unit:  
29 Non-hydrogen atoms with anisotropic displacement parameters  
24 Hydrogen atoms with isotropic displacement parameters  
Hydrogen Atoms: All hydrogen atom positions were found in the difference map calculated from the model containing all non-hydrogen atoms. The hydrogen positions were refined with individual isotropic displacement parameters.  
Atomic Form Factors: For neutral atoms and anomalous dispersion [4]  
Extinction Correction: no  
Weighting Scheme:  $w^{-1} = \sigma^2(F_o^2) + (a*P)^2 + b*P$   
with a: 0.0265; b: 0.4988; P: [Maximum(0 or  $F_o^2$ ) + 2\* $F_c^2$ ]/3  
Shift/Err: Less than 0.001 in the last cycle of refinement:  
Resid. Electron Density: +0.15  $e_0/\text{\AA}^3$ ; -0.16  $e_0/\text{\AA}^3$   
R1:  $\Sigma(|F_o| - |F_c|) / \Sigma|F_o|$   
[ $F_o > 4\sigma(F_o)$ ; N=3539]: = 0.0246  
[all reflctns; N=3635]: = 0.0255  
wR2:  $[\Sigma w(F_o^2 - F_c^2)^2 / \Sigma w(F_o^2)^2]^{1/2}$   
[ $F_o > 4\sigma(F_o)$ ; N=3539]: = 0.0606  
[all reflctns; N=3635]: = 0.0612  
Goodness of fit:  $[\Sigma w(F_o^2 - F_c^2)^2 / (\text{NO} - \text{NV})]^{1/2}$  = 1.077  
Flack's Parameter : x = -0.2(7)  
Remarks: Refinement expression  $\Sigma w(F_o^2 - F_c^2)^2$   
The correct enantiomere could **not** be proved by Flack's Parameter.

## References:

- [1] APEX suite of crystallographic software. APEX 2 Version 2008.4. Bruker AXS Inc., Madison, Wisconsin, USA (2008).
- [2] SAINT, Version 7.56a and SADABS Version 2008/1. Bruker AXS Inc., Madison, Wisconsin, USA (2008).
- [3] Altomare, A.; Cascarano, G.; Giacovazzo, C.; Guagliardi, A.; Burla, M. C.; Polidori, G.; Camalli M. "**SIR92**", *J. Appl. Cryst.* **1994**, 27, 435-436.
- [4] International Tables for Crystallography, Vol. C, Tables 6.1.1.4 (pp. 500-502), 4.2.6.8 (pp. 219-222), and 4.2.4.2 (pp. 193-199), Wilson, A. J. C., Ed., Kluwer Academic Publishers, Dordrecht, The Netherlands, 1992.
- [5] Sheldrick, G. M. "**SHELXL-97**", University of Göttingen, Göttingen, Germany, (1998).
- [6] Spek, A. L. "**PLATON**", A Multipurpose Crystallographic Tool, Utrecht University, Utrecht, The Netherlands, (2010).
- [7] L. J. Farrugia, "**WinGX** (Version 1.70.01 January 2005) ", *J. Appl. Cryst.* **1999**, 32, 837-838.



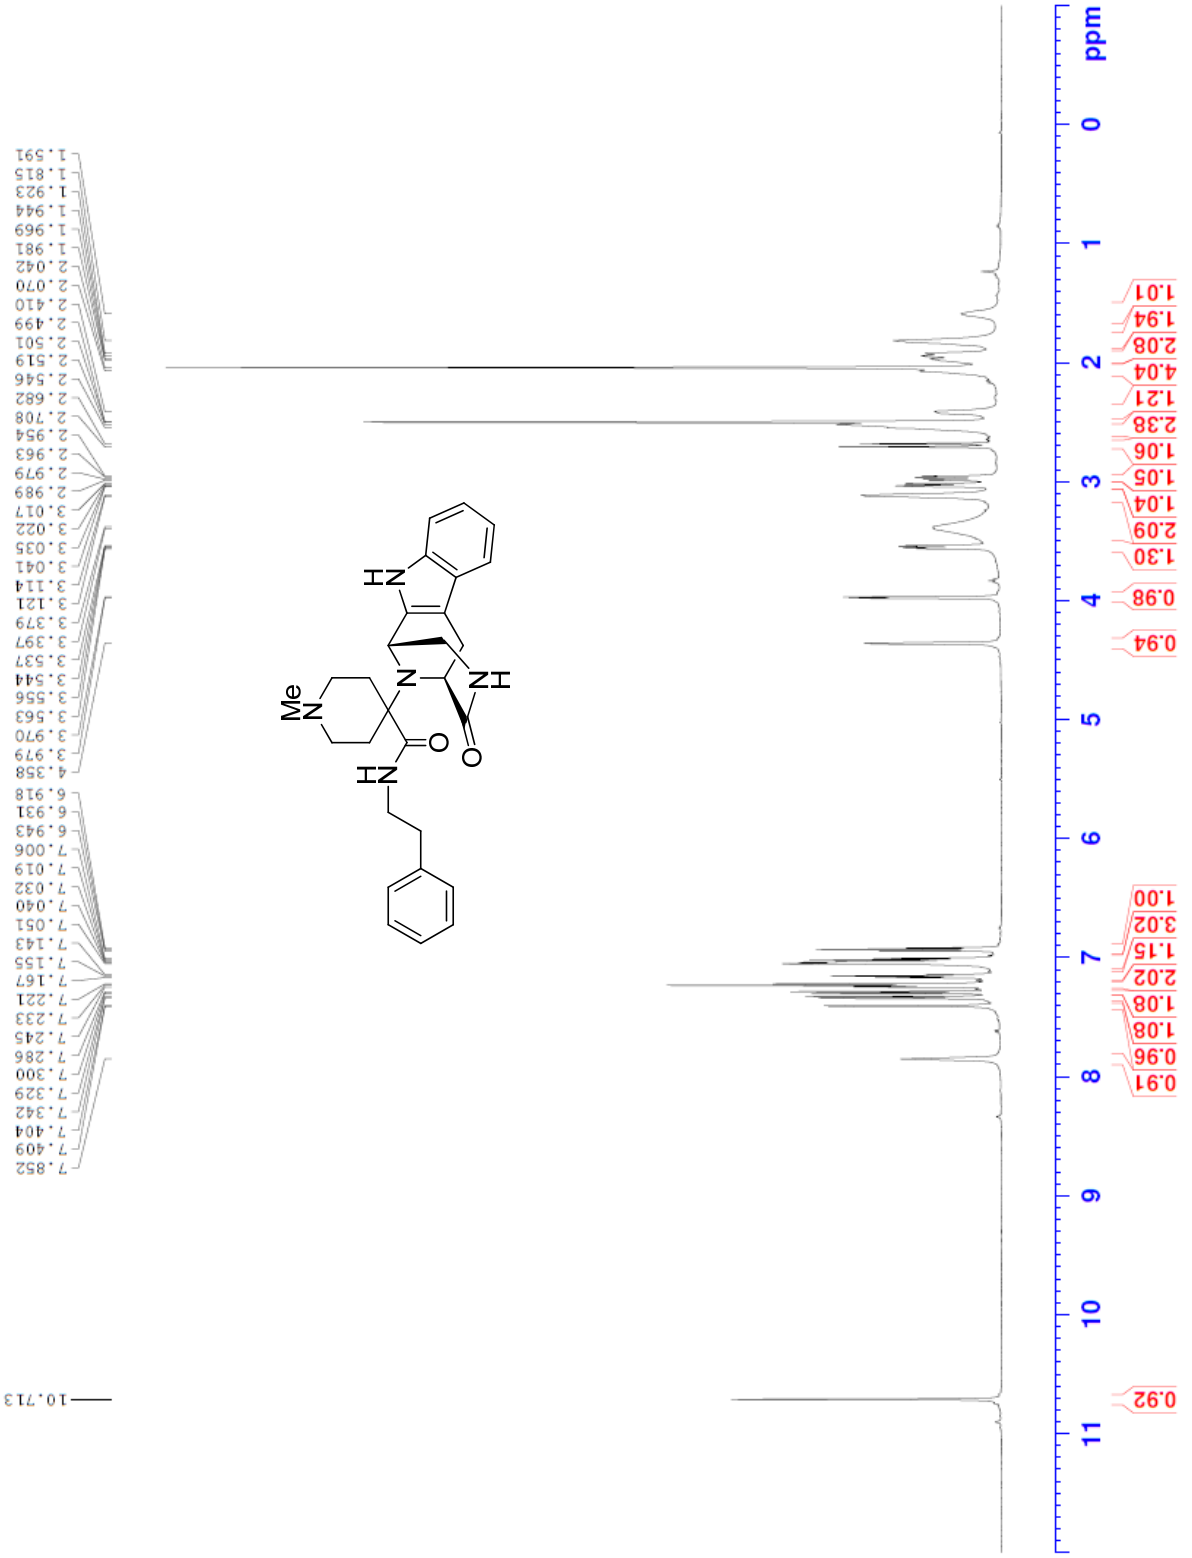

Compound-19

Compound-19

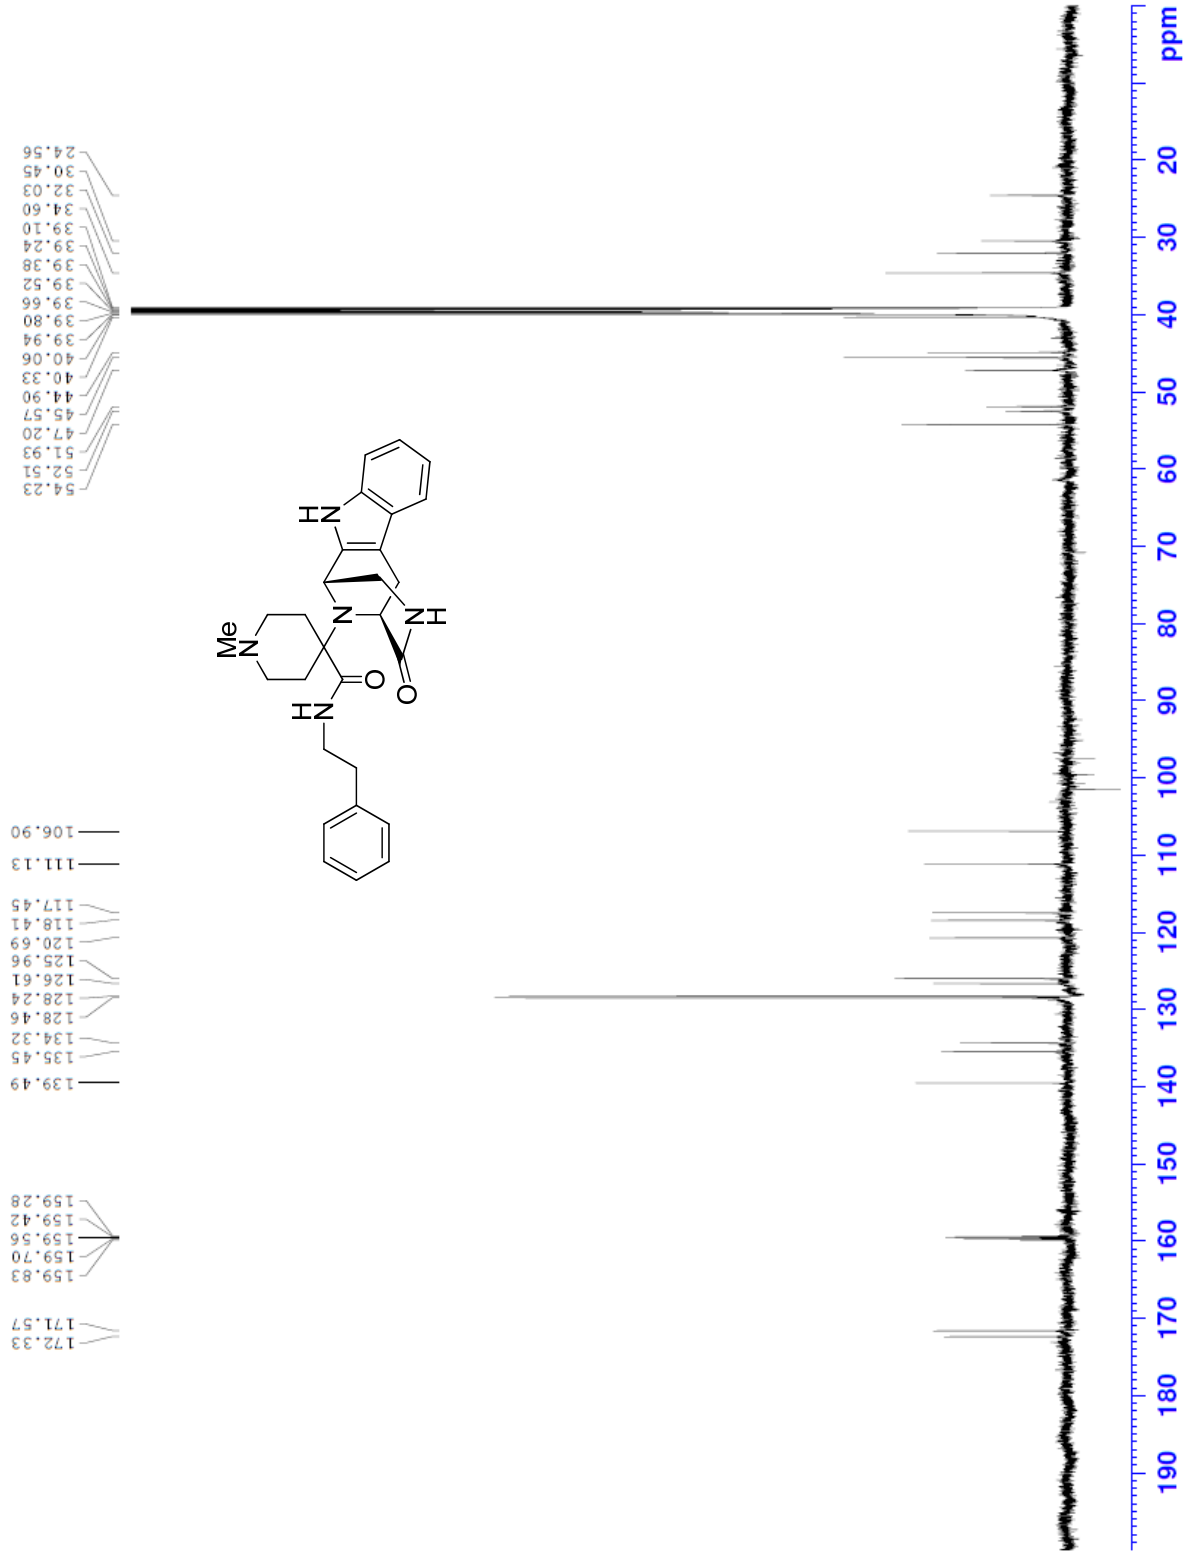

# Compound-19

1: Scan AP+  
TIC  
2,08e7

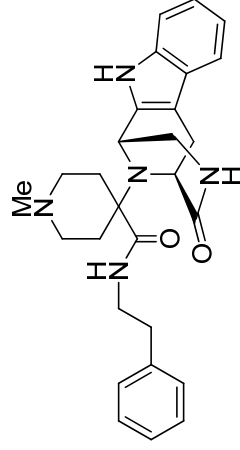

Chemical Formula:  $C_{28}H_{33}N_5O_2$   
Molecular Weight: 471.59

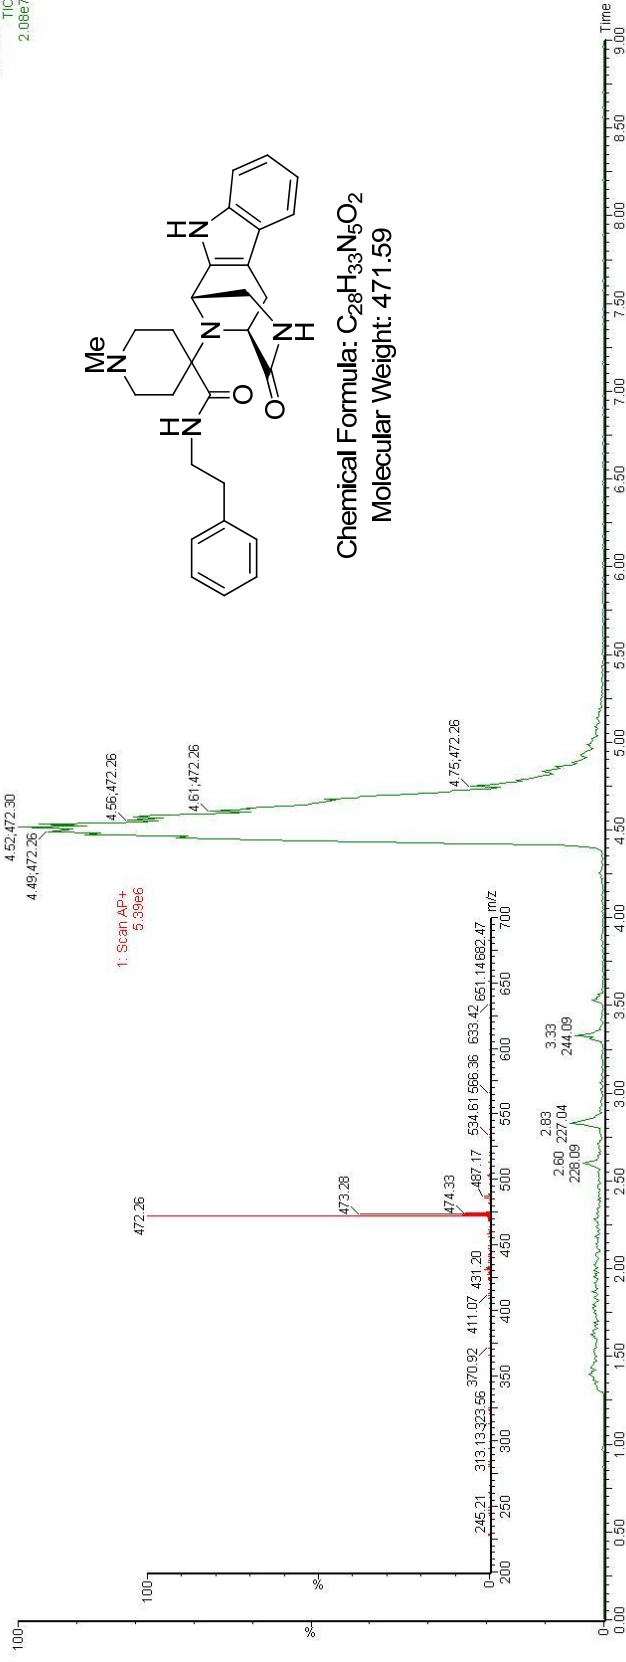

Compound-20

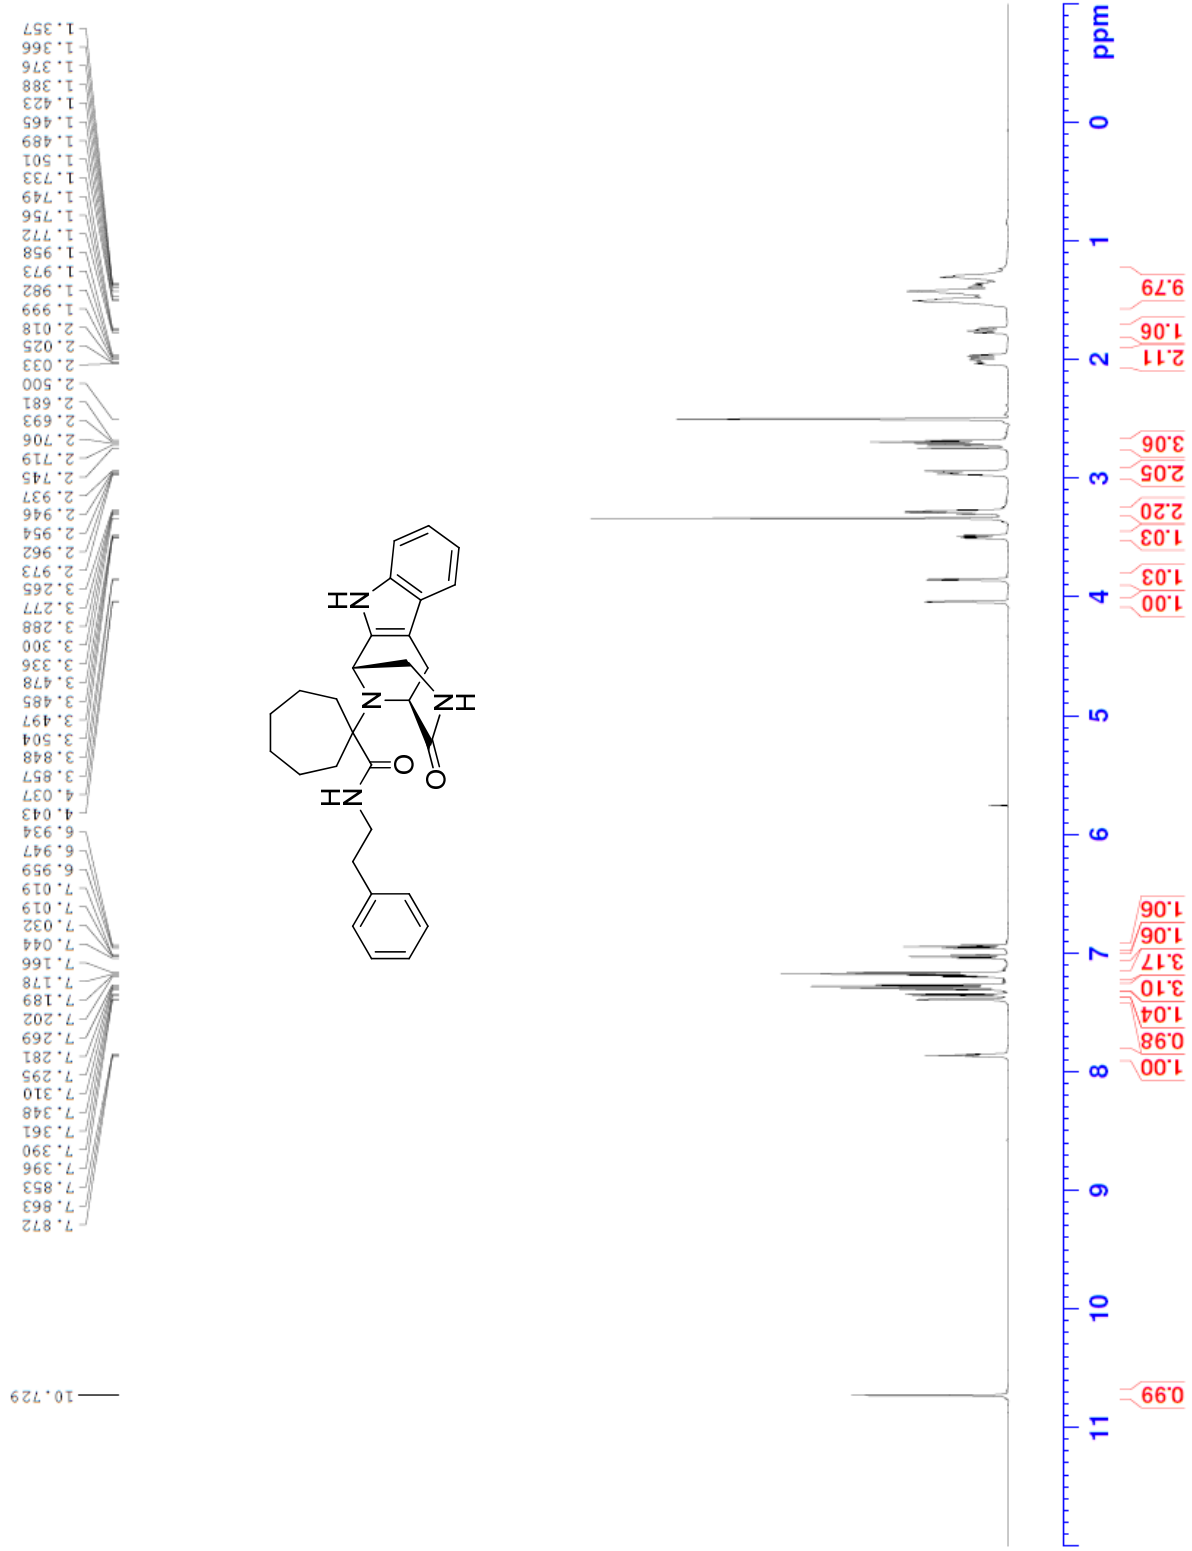



# Compound-20

1: Scan AP+  
TIC  
3.64e7

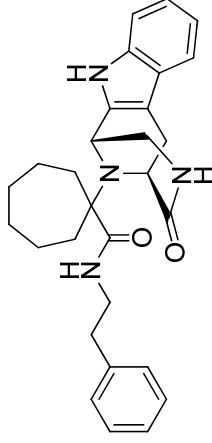

Chemical Formula:  $C_{29}H_{34}N_4O_2$   
Molecular Weight: 470.61

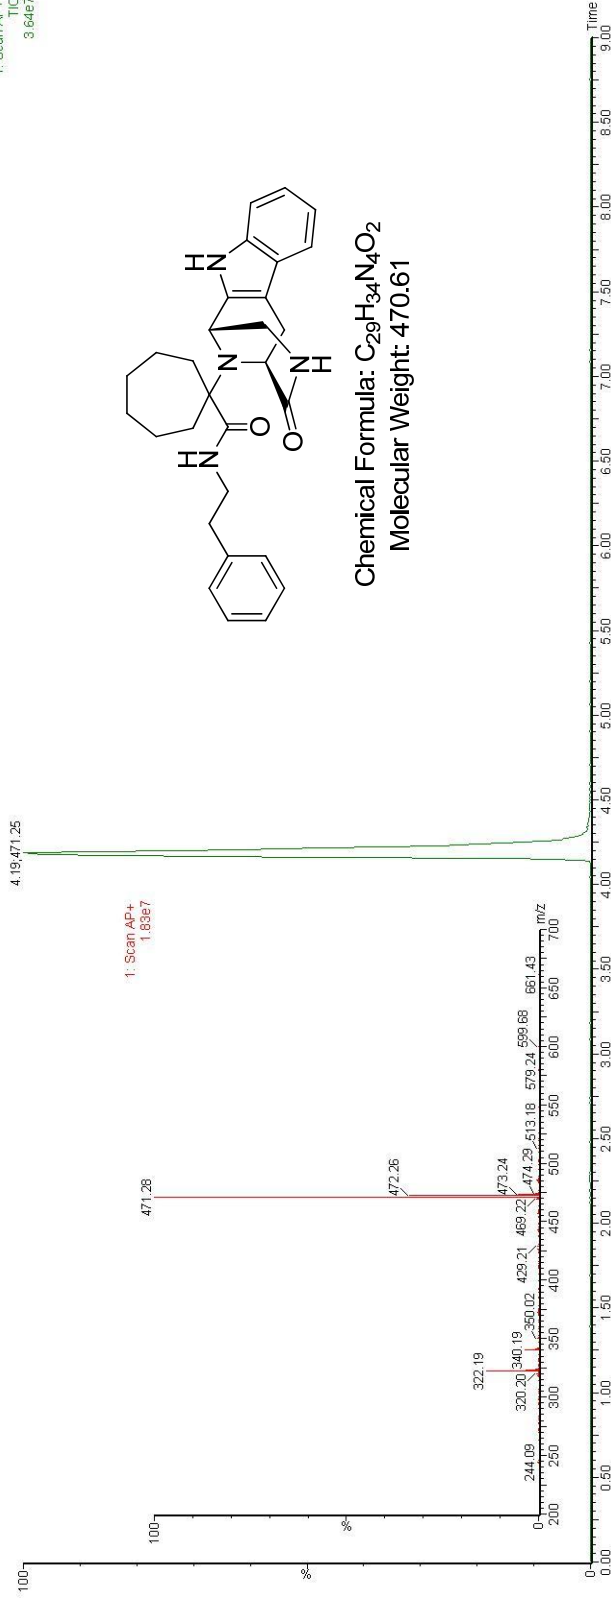

Compound-21

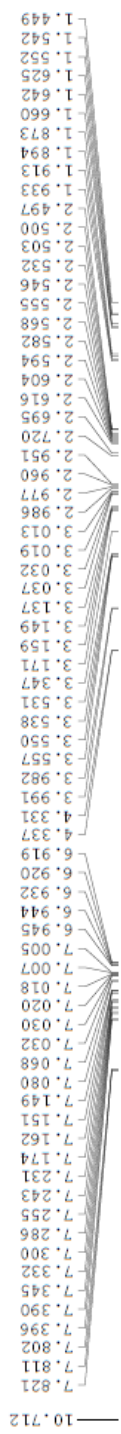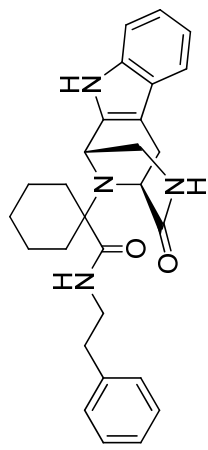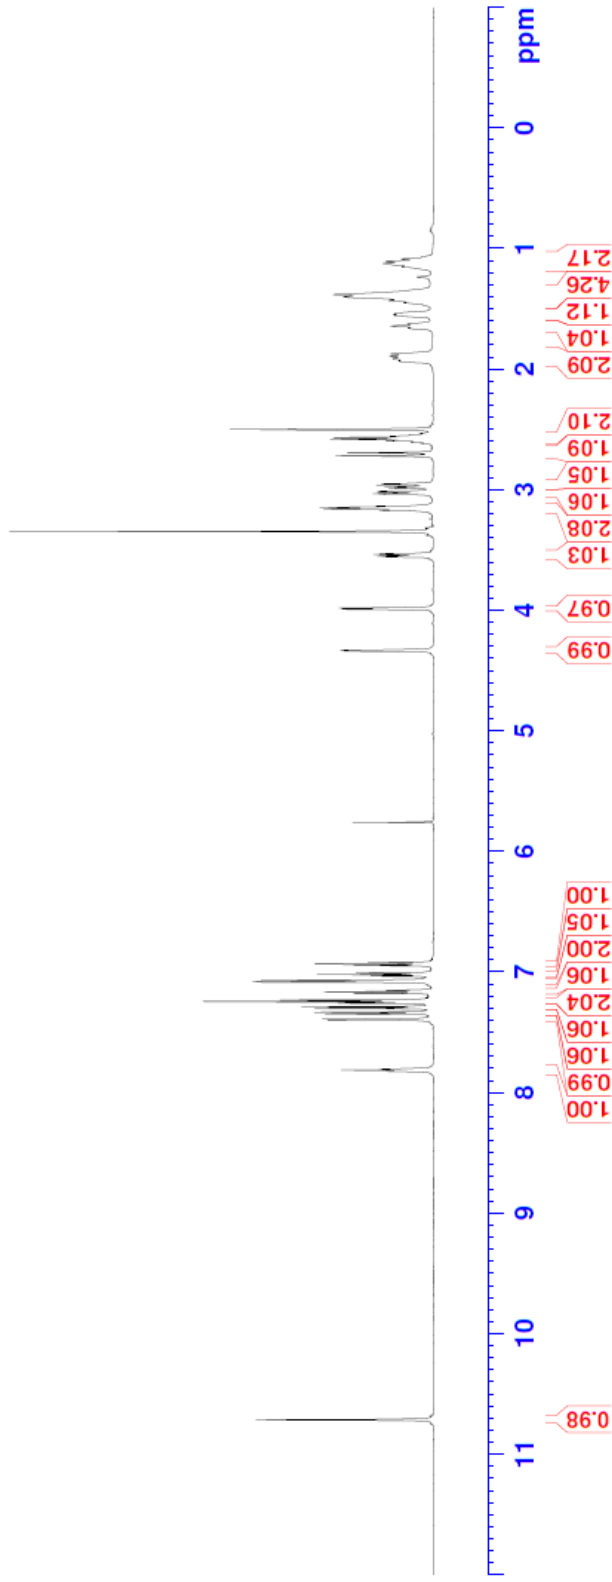

Compound-21

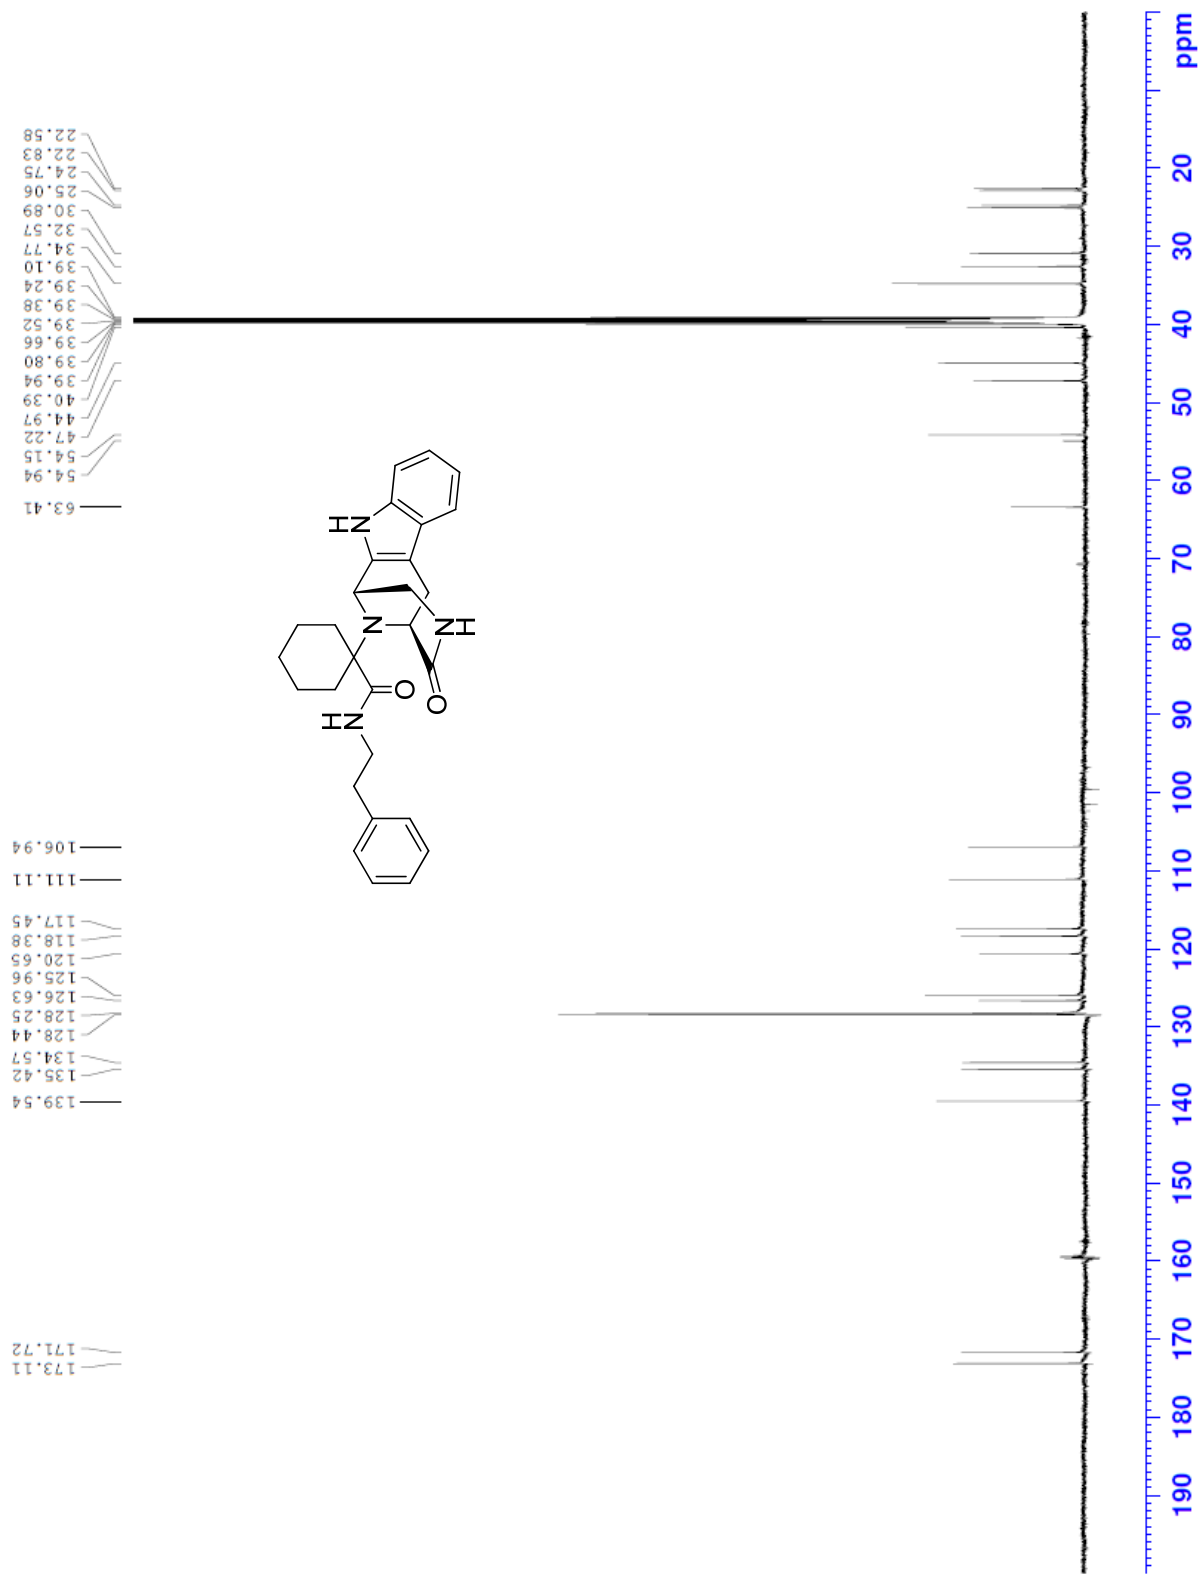



# Compound-21

1: Scan AP+  
TIC  
2.31e7

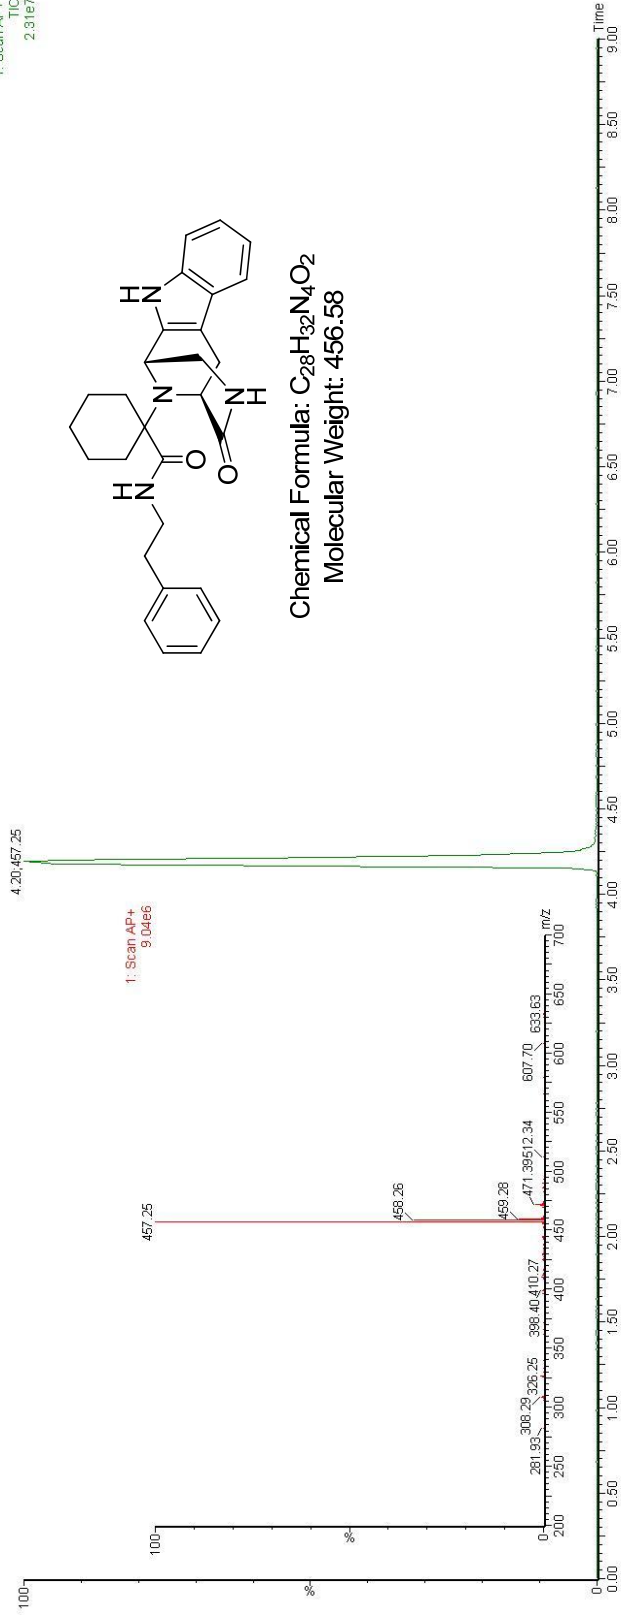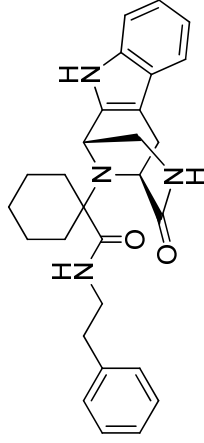

Chemical Formula:  $C_{28}H_{32}N_4O_2$   
Molecular Weight: 456.58

Compound-22

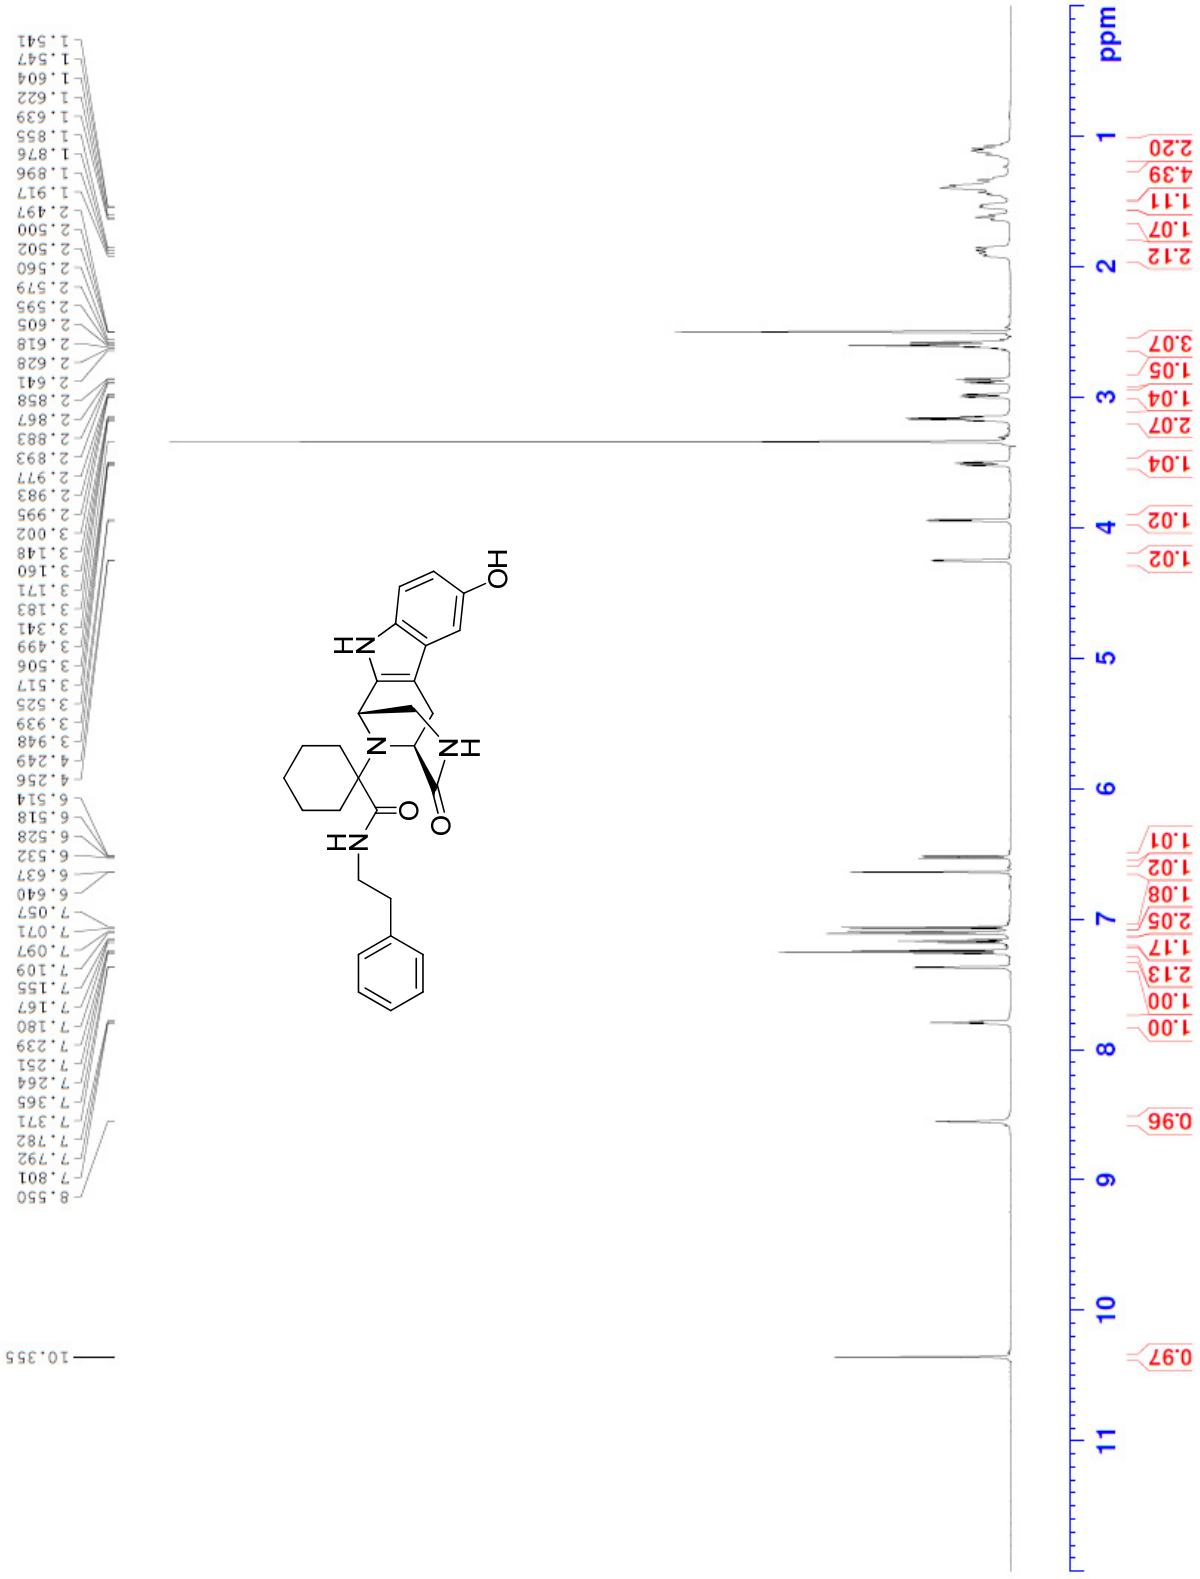

Compound-22

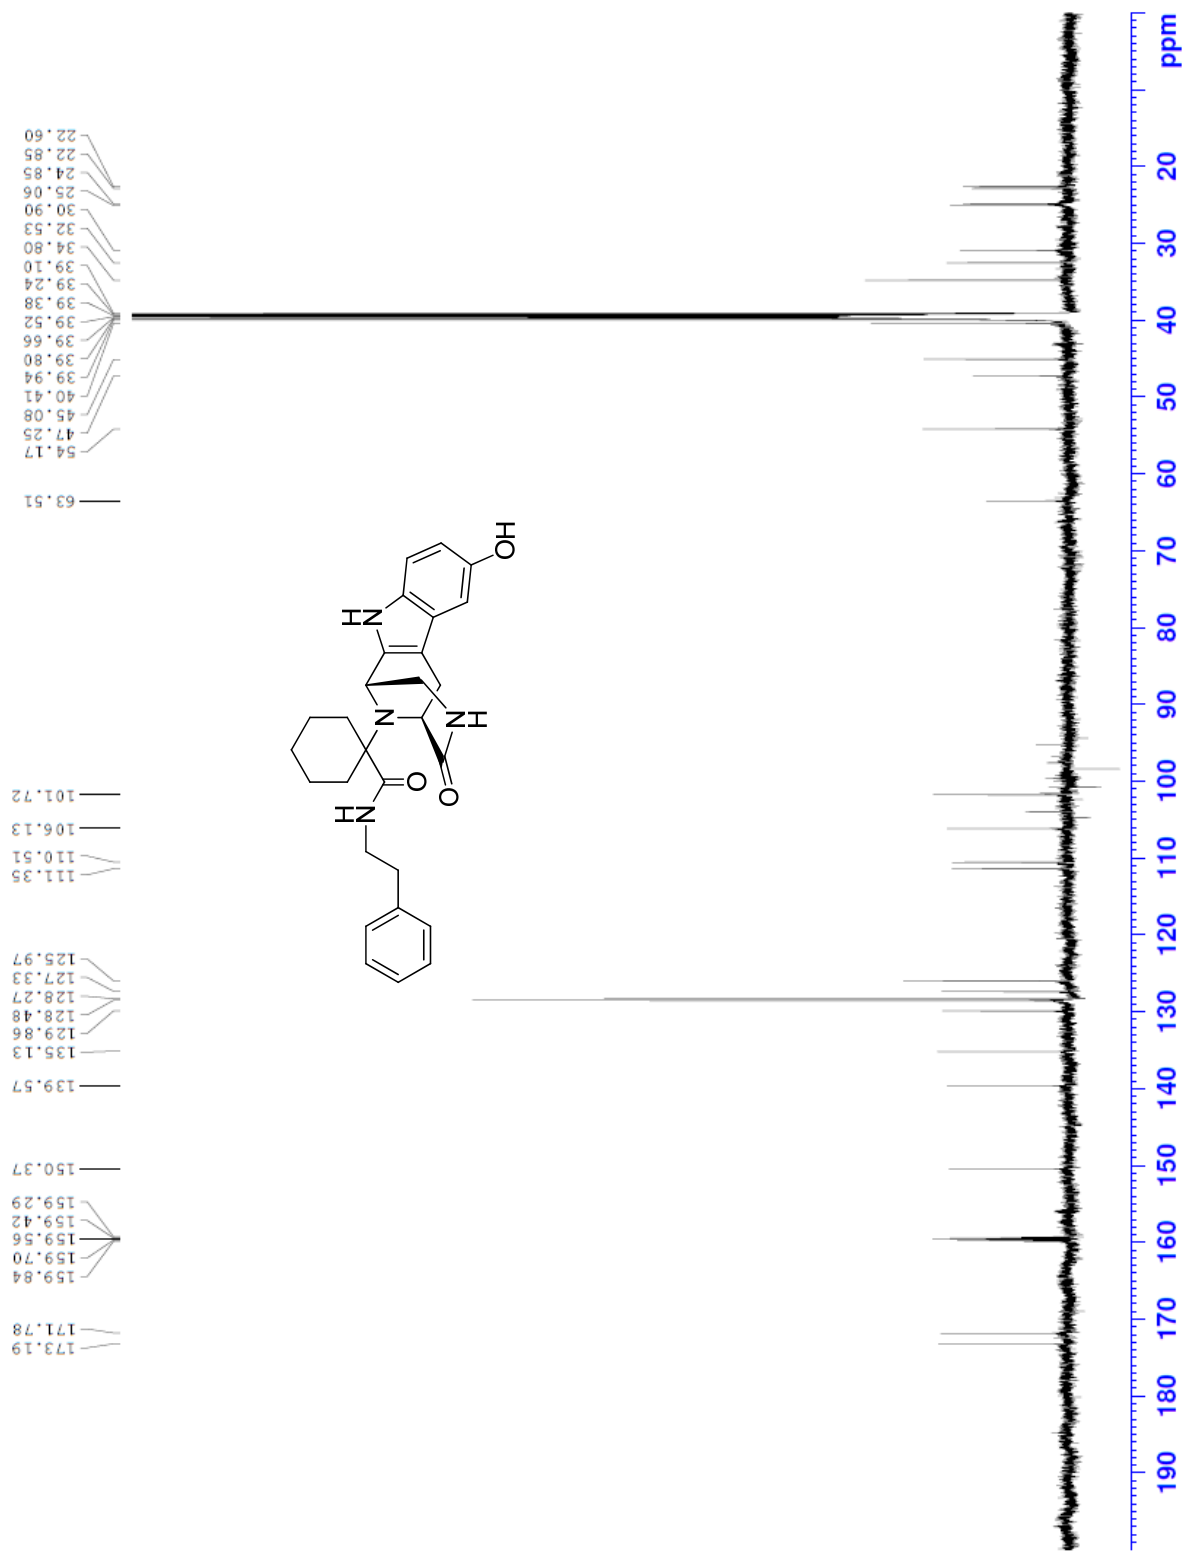

# Compound-22

1: Scan AP+  
TIC  
1.86e7

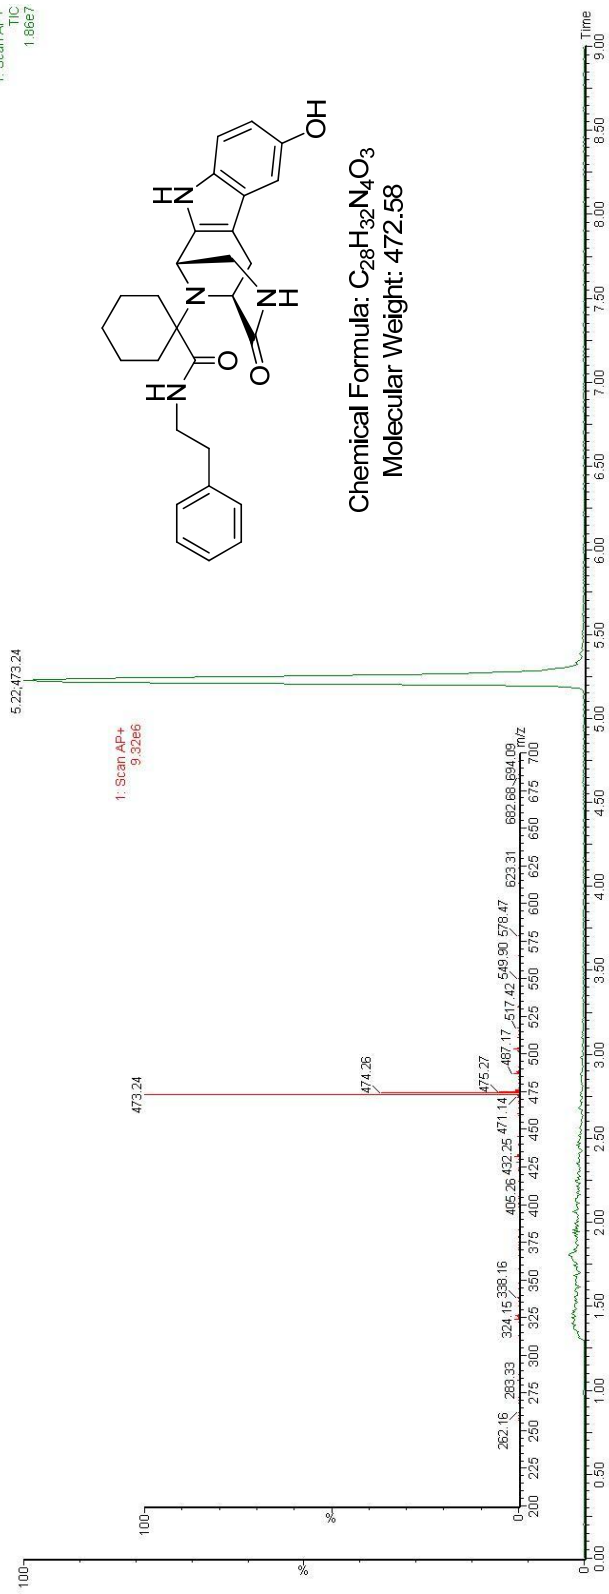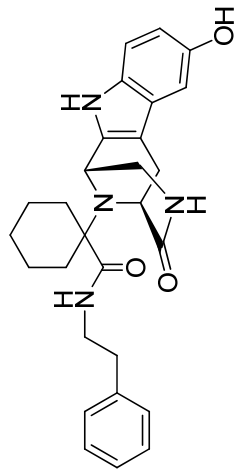

Chemical Formula: C<sub>28</sub>H<sub>32</sub>N<sub>4</sub>O<sub>3</sub>  
Molecular Weight: 472.58

Compound-23

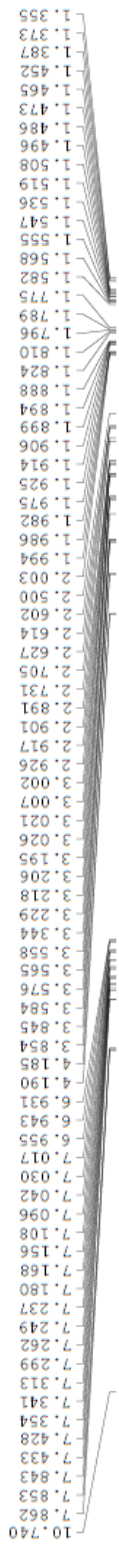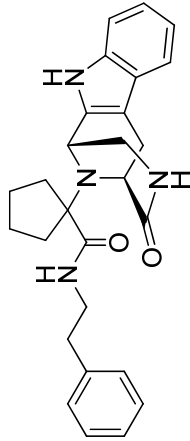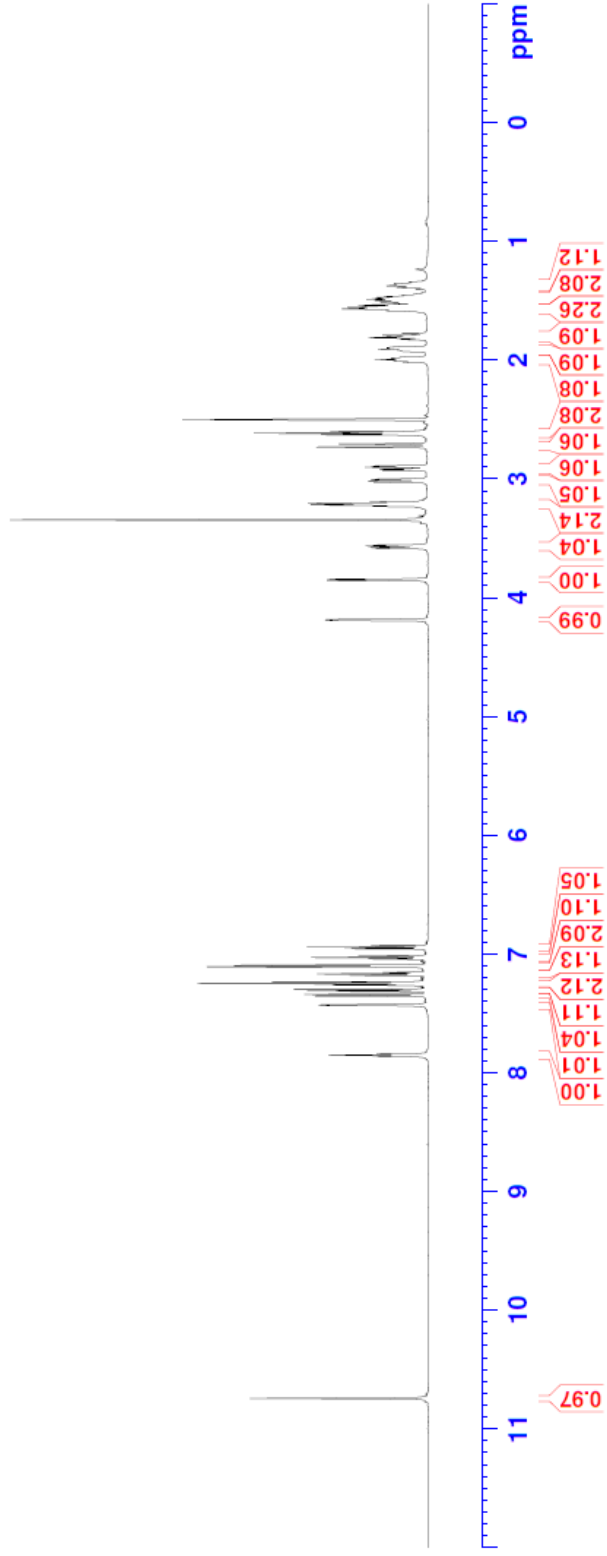

Compound-23

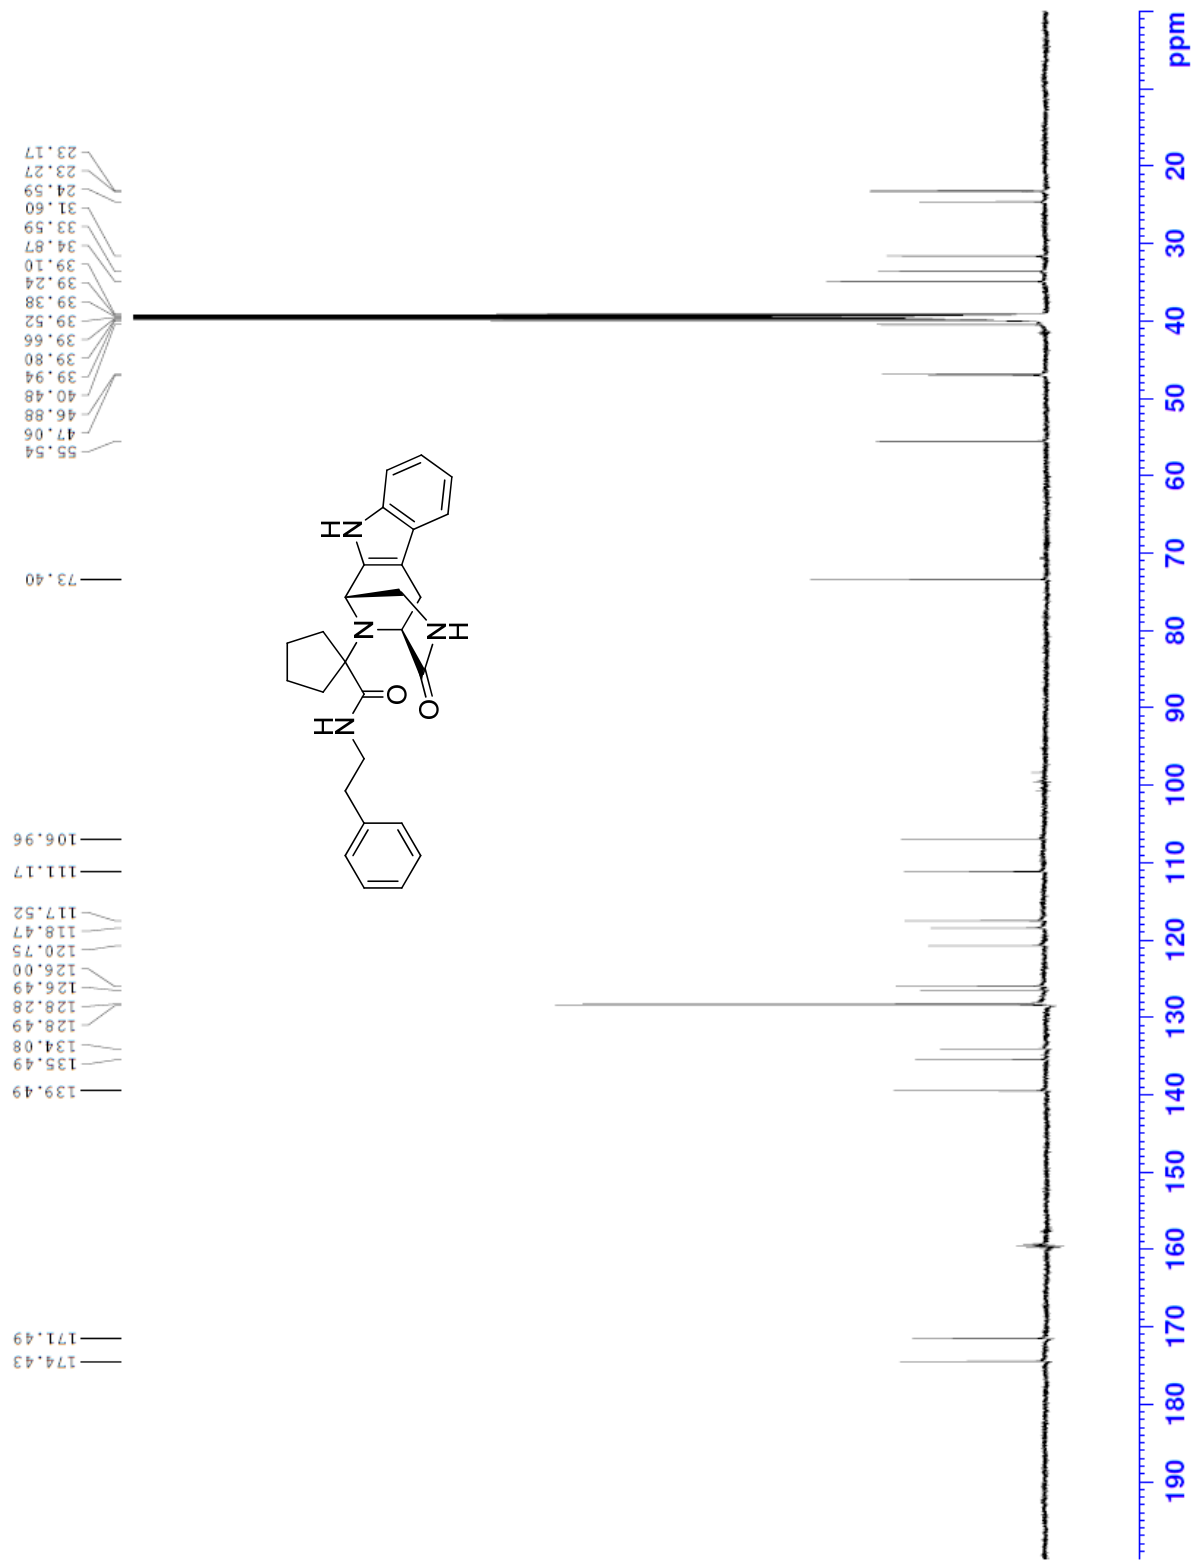

# Compound-23

1: Scan AP+  
TIC  
3.46e7

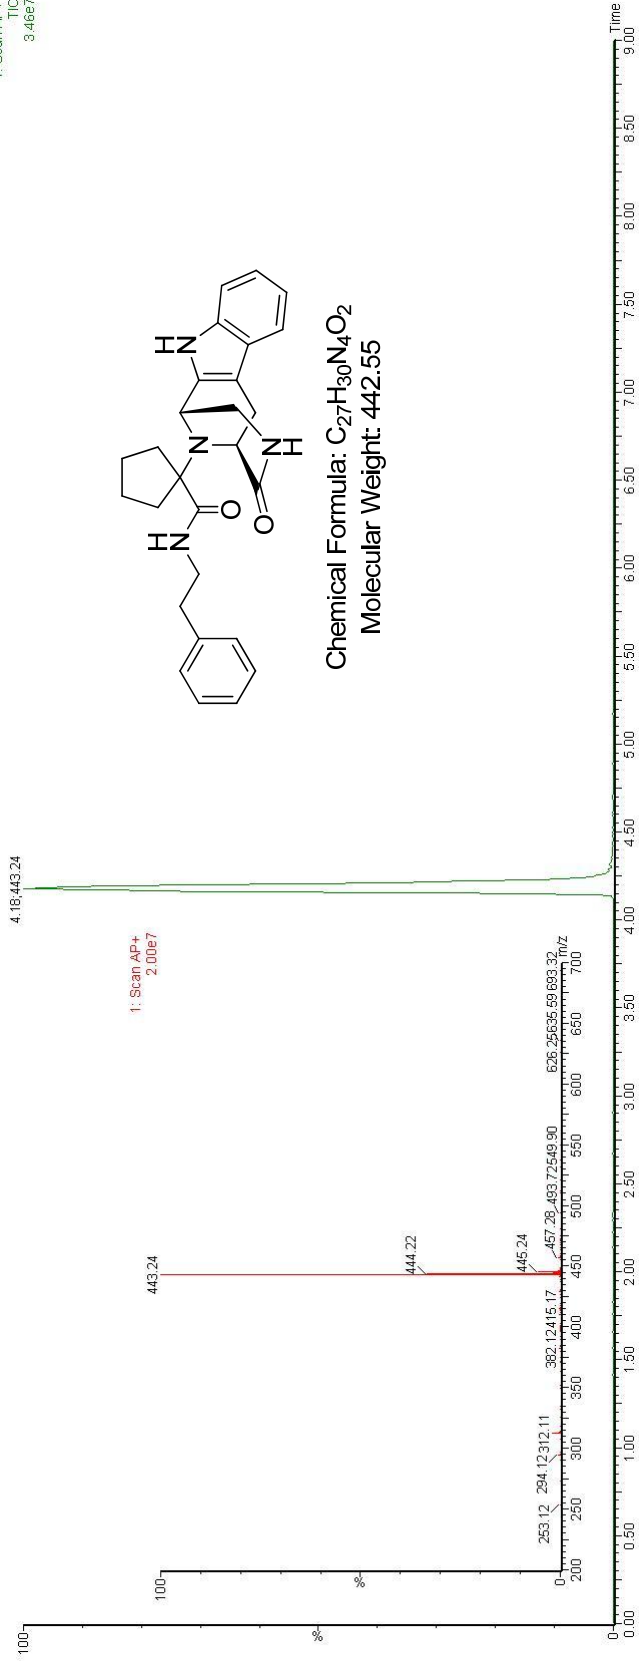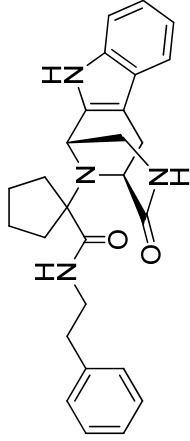

Chemical Formula:  $C_{27}H_{30}N_4O_2$   
Molecular Weight: 442.55

Compound-24

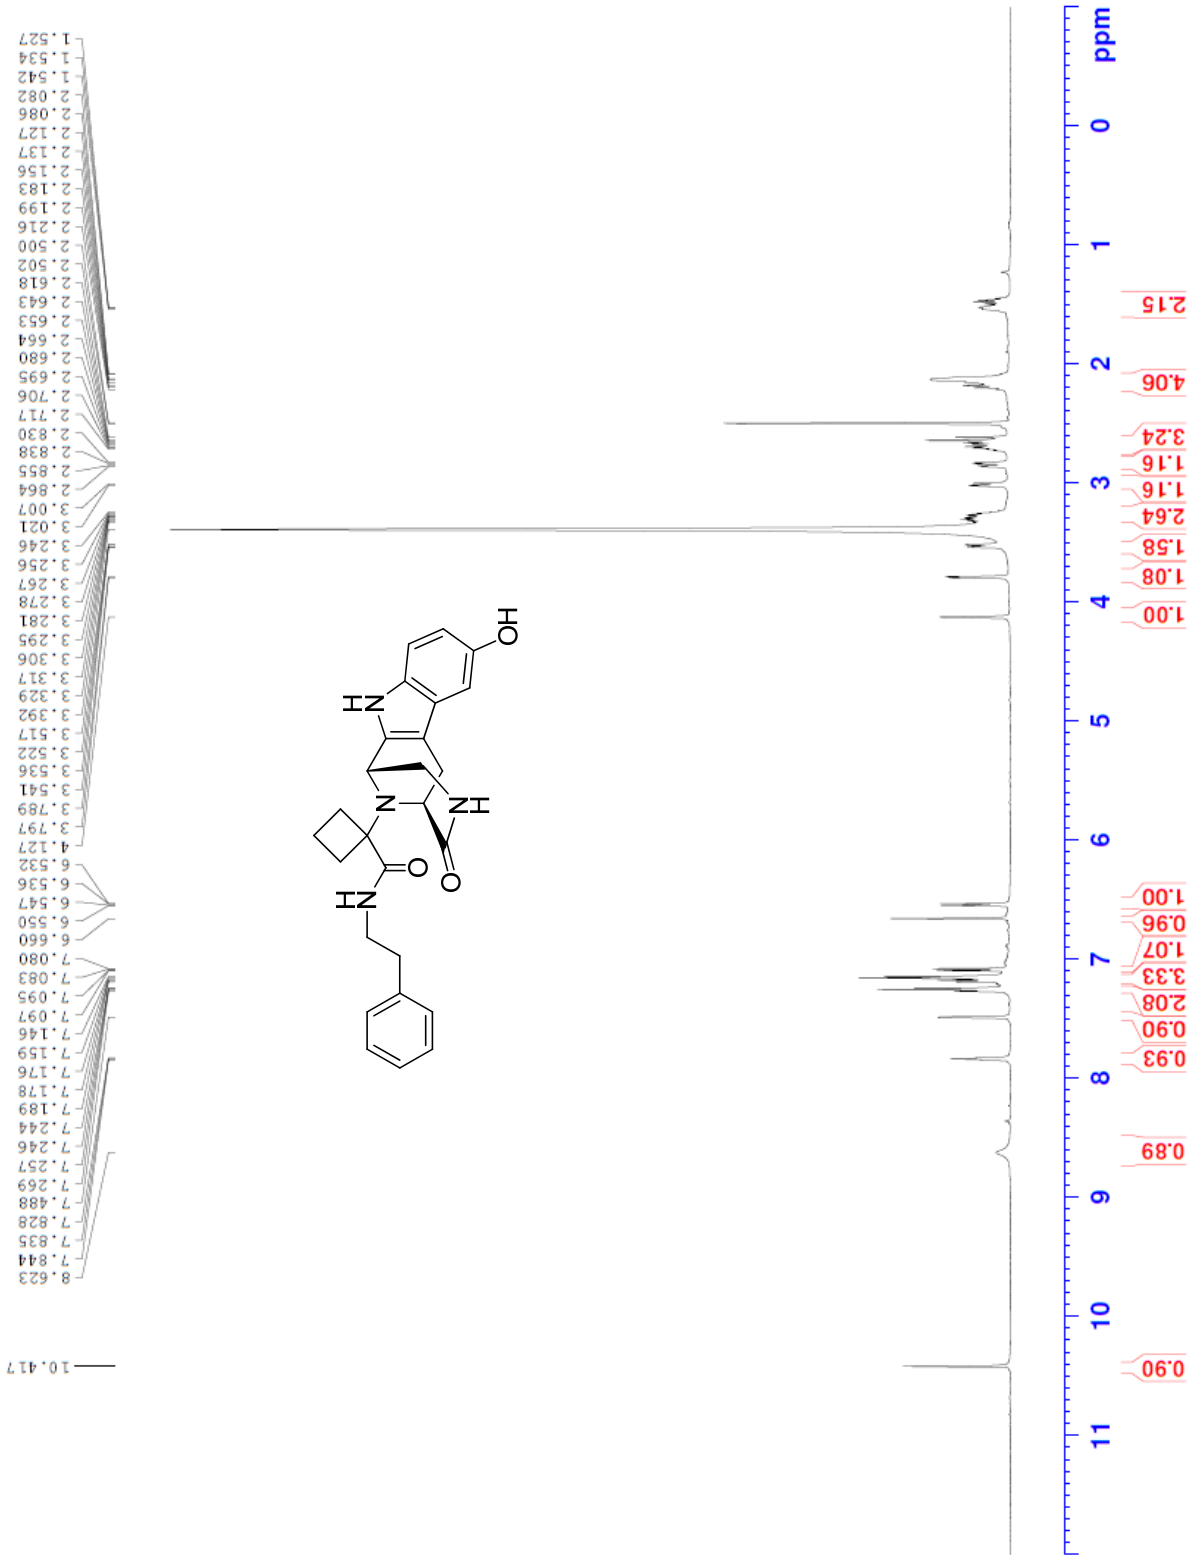



Compound-24

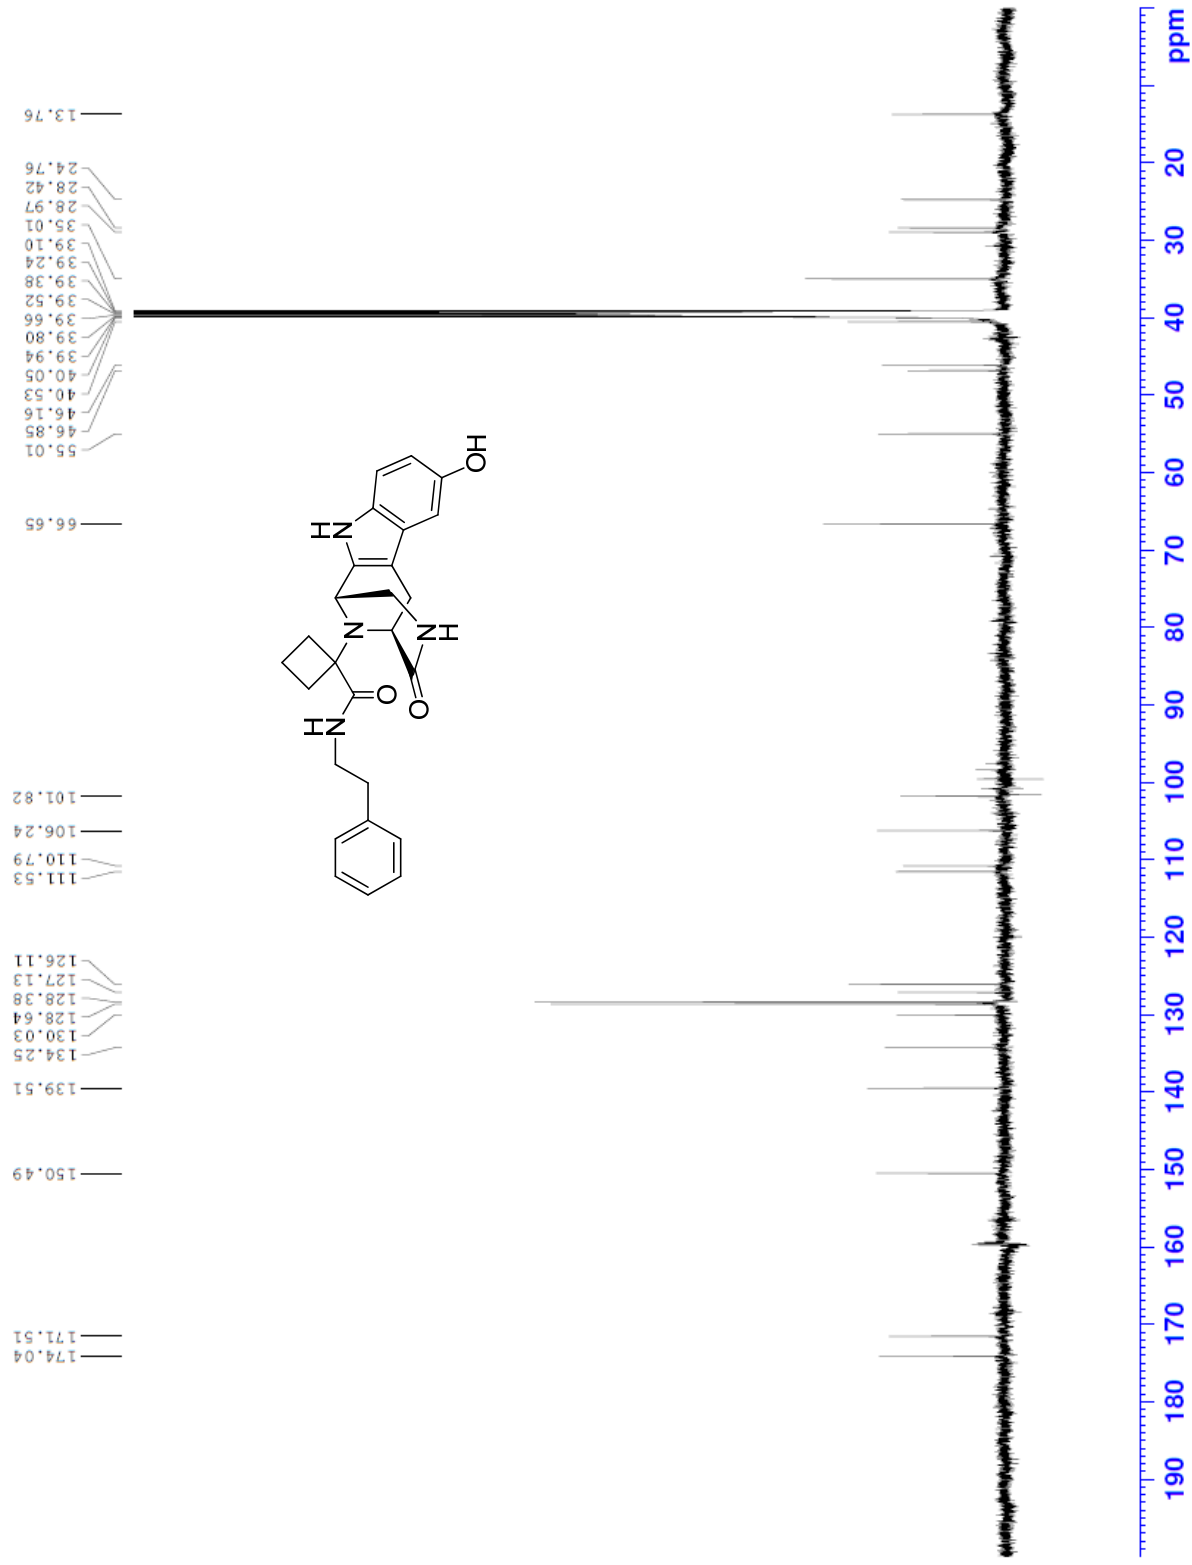

# Compound-24

1: Scan AP+  
TIC  
3.08e7

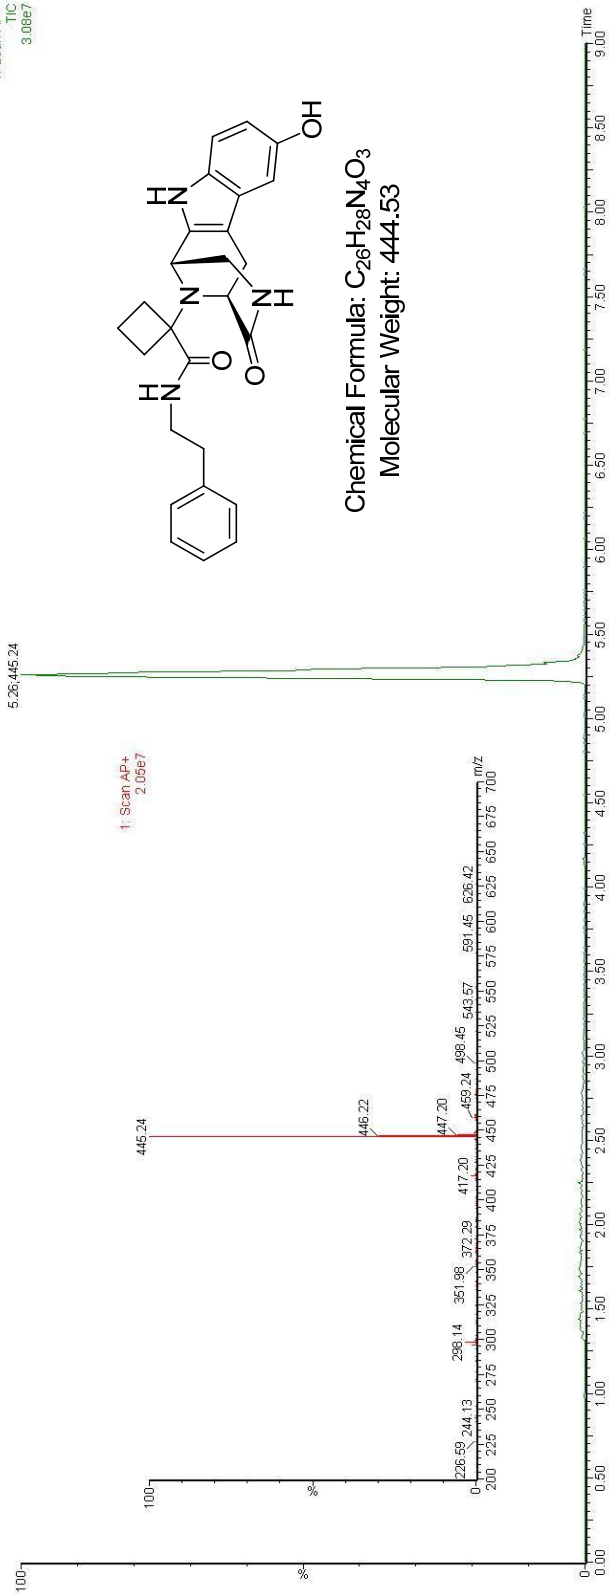

1: Scan AP+  
2.05e7

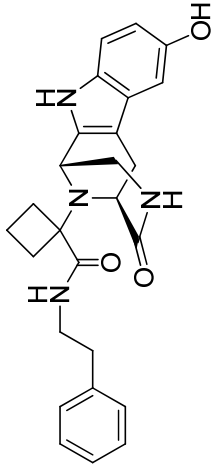

Chemical Formula: C<sub>26</sub>H<sub>28</sub>N<sub>4</sub>O<sub>3</sub>  
Molecular Weight: 444.53

Compound-25

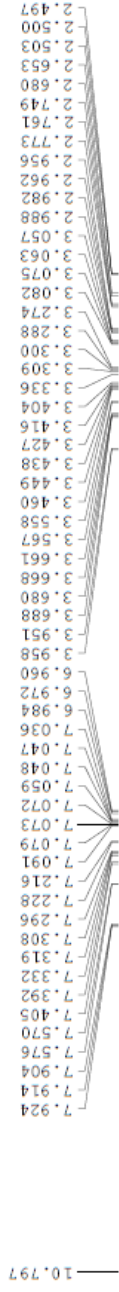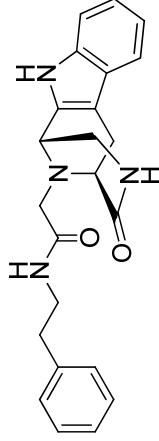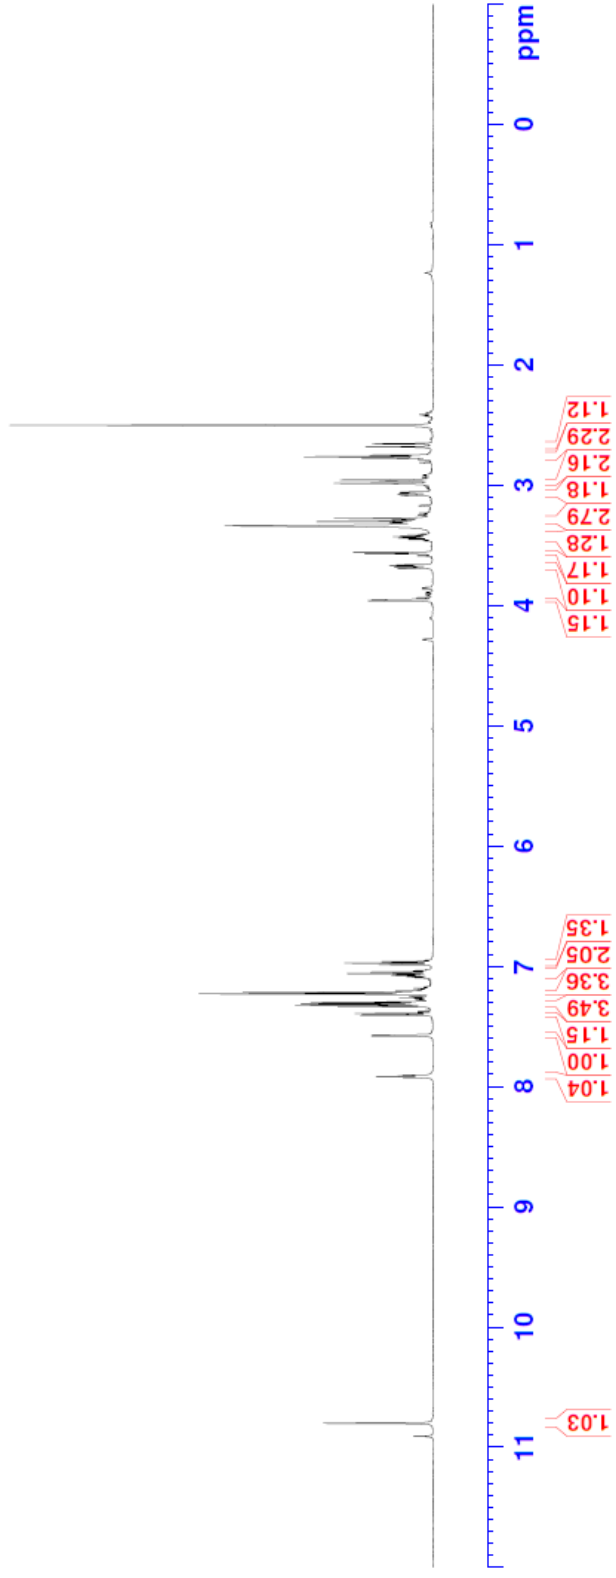

Compound-25

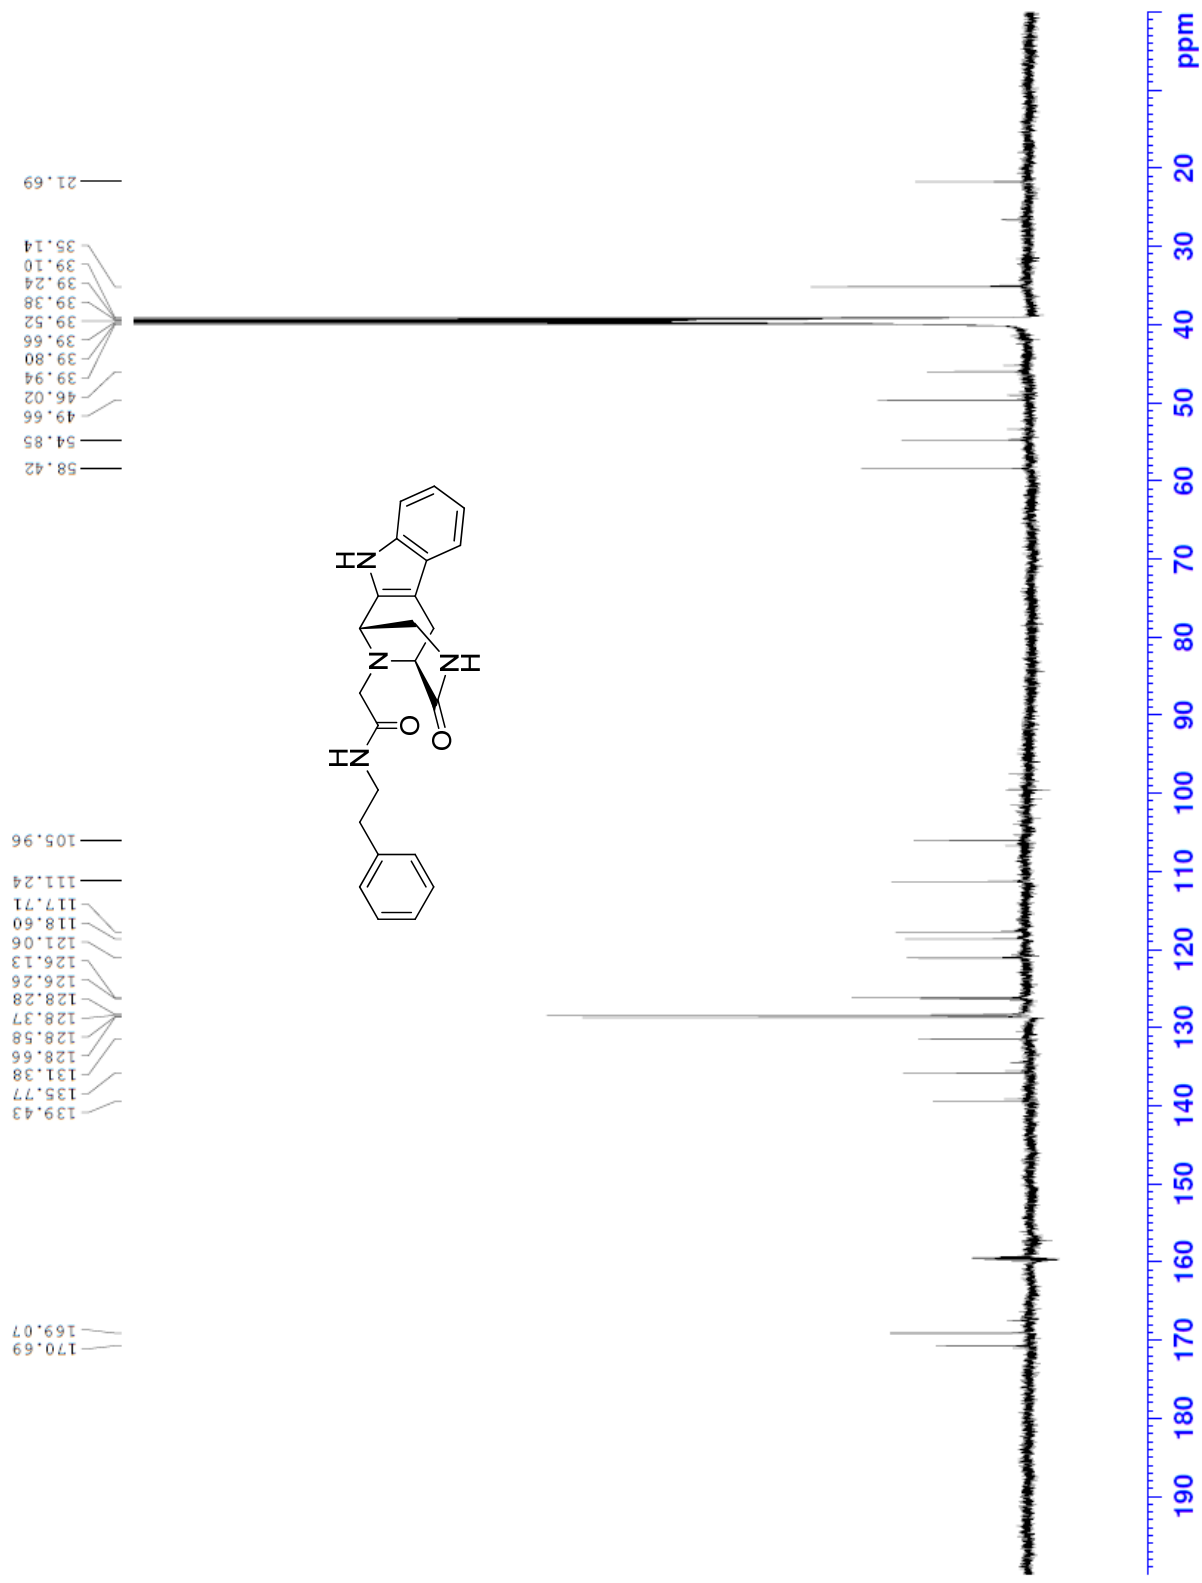

# Compound-25

1: Scan AP+  
TIC  
7.40E7

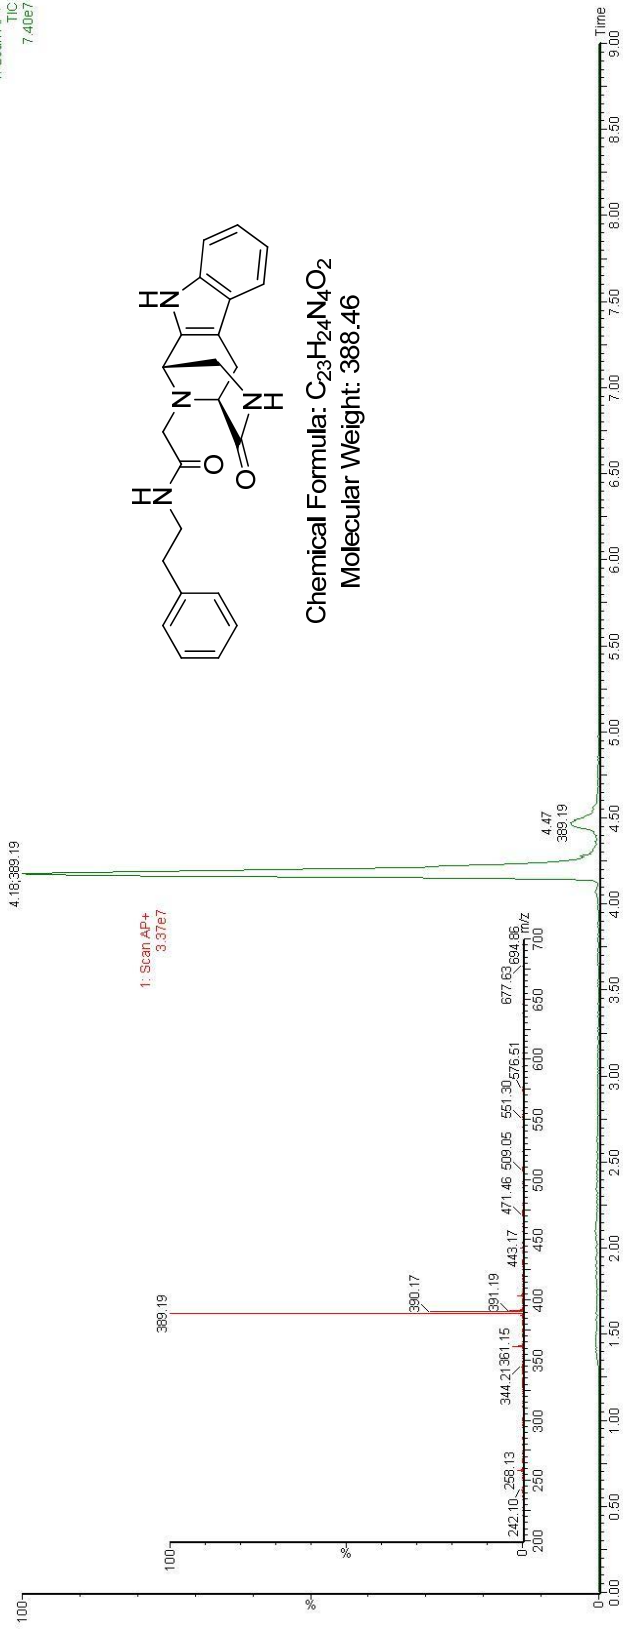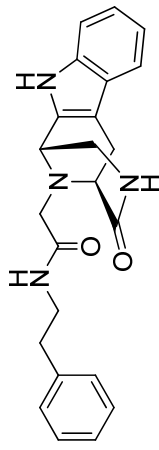

Chemical Formula: C<sub>23</sub>H<sub>24</sub>N<sub>4</sub>O<sub>2</sub>  
Molecular Weight: 388.46

Compound-26

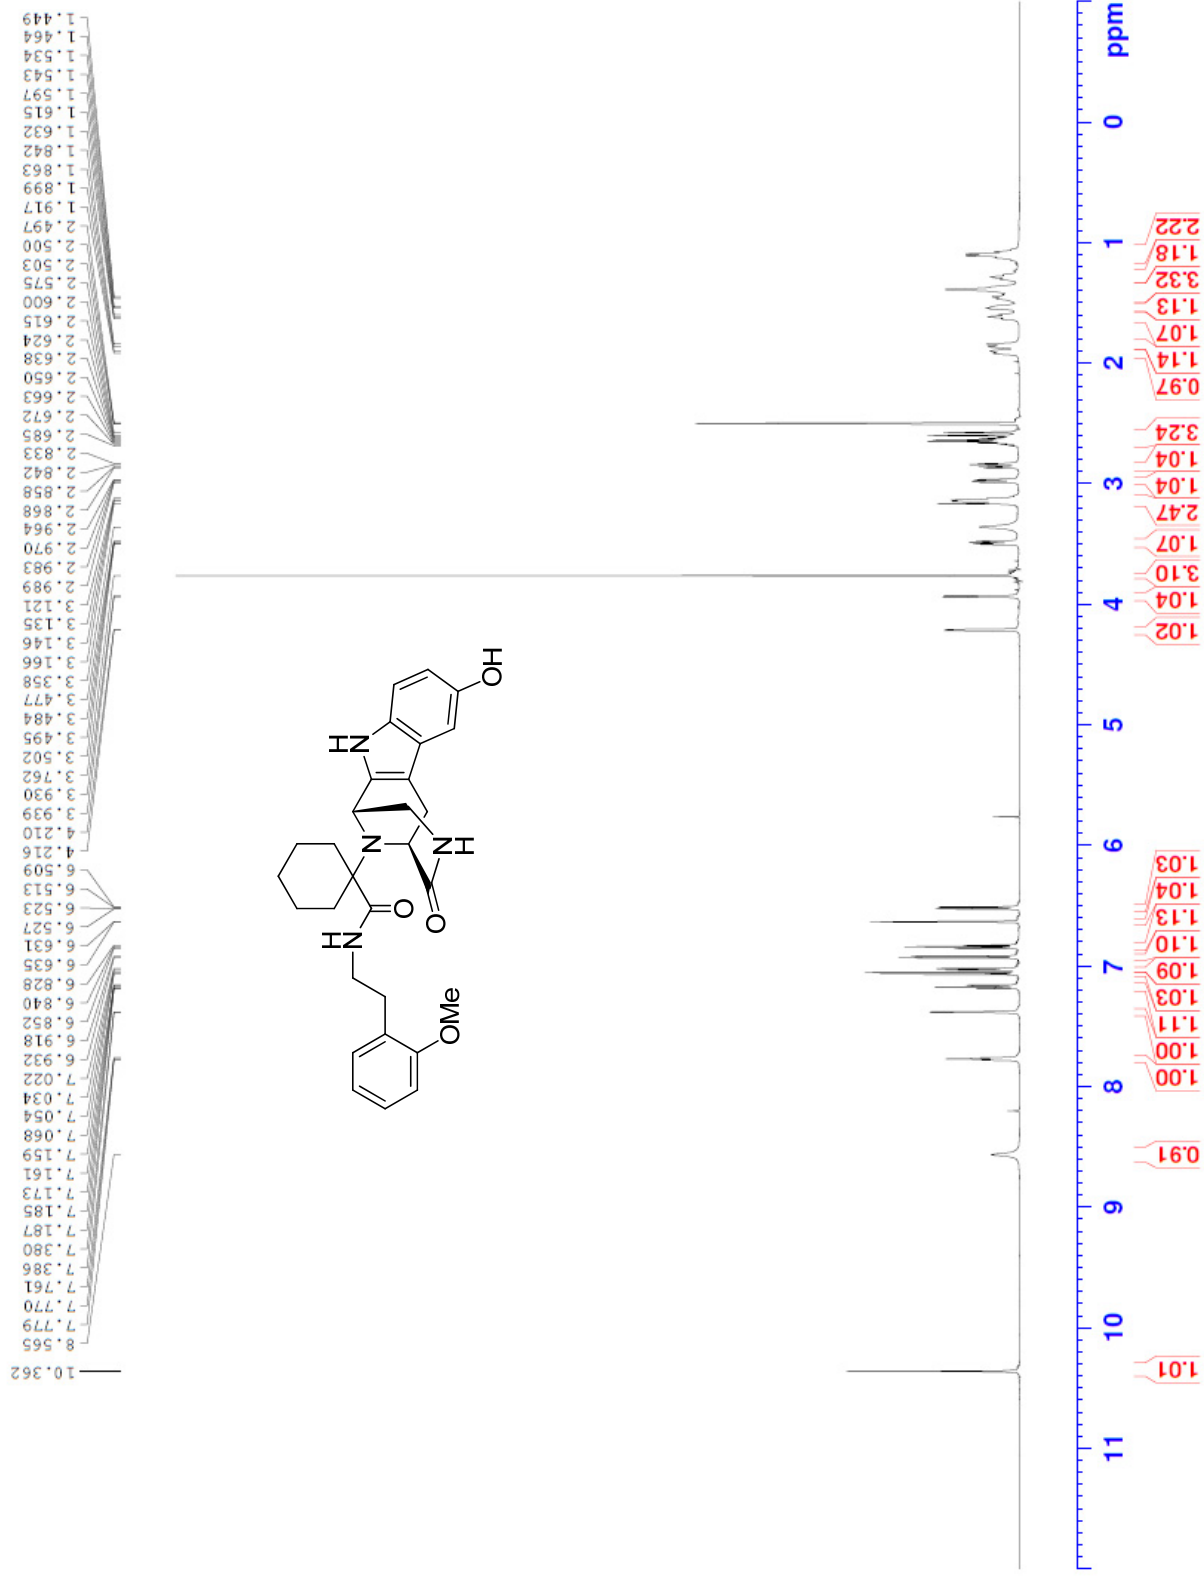

Compound-26

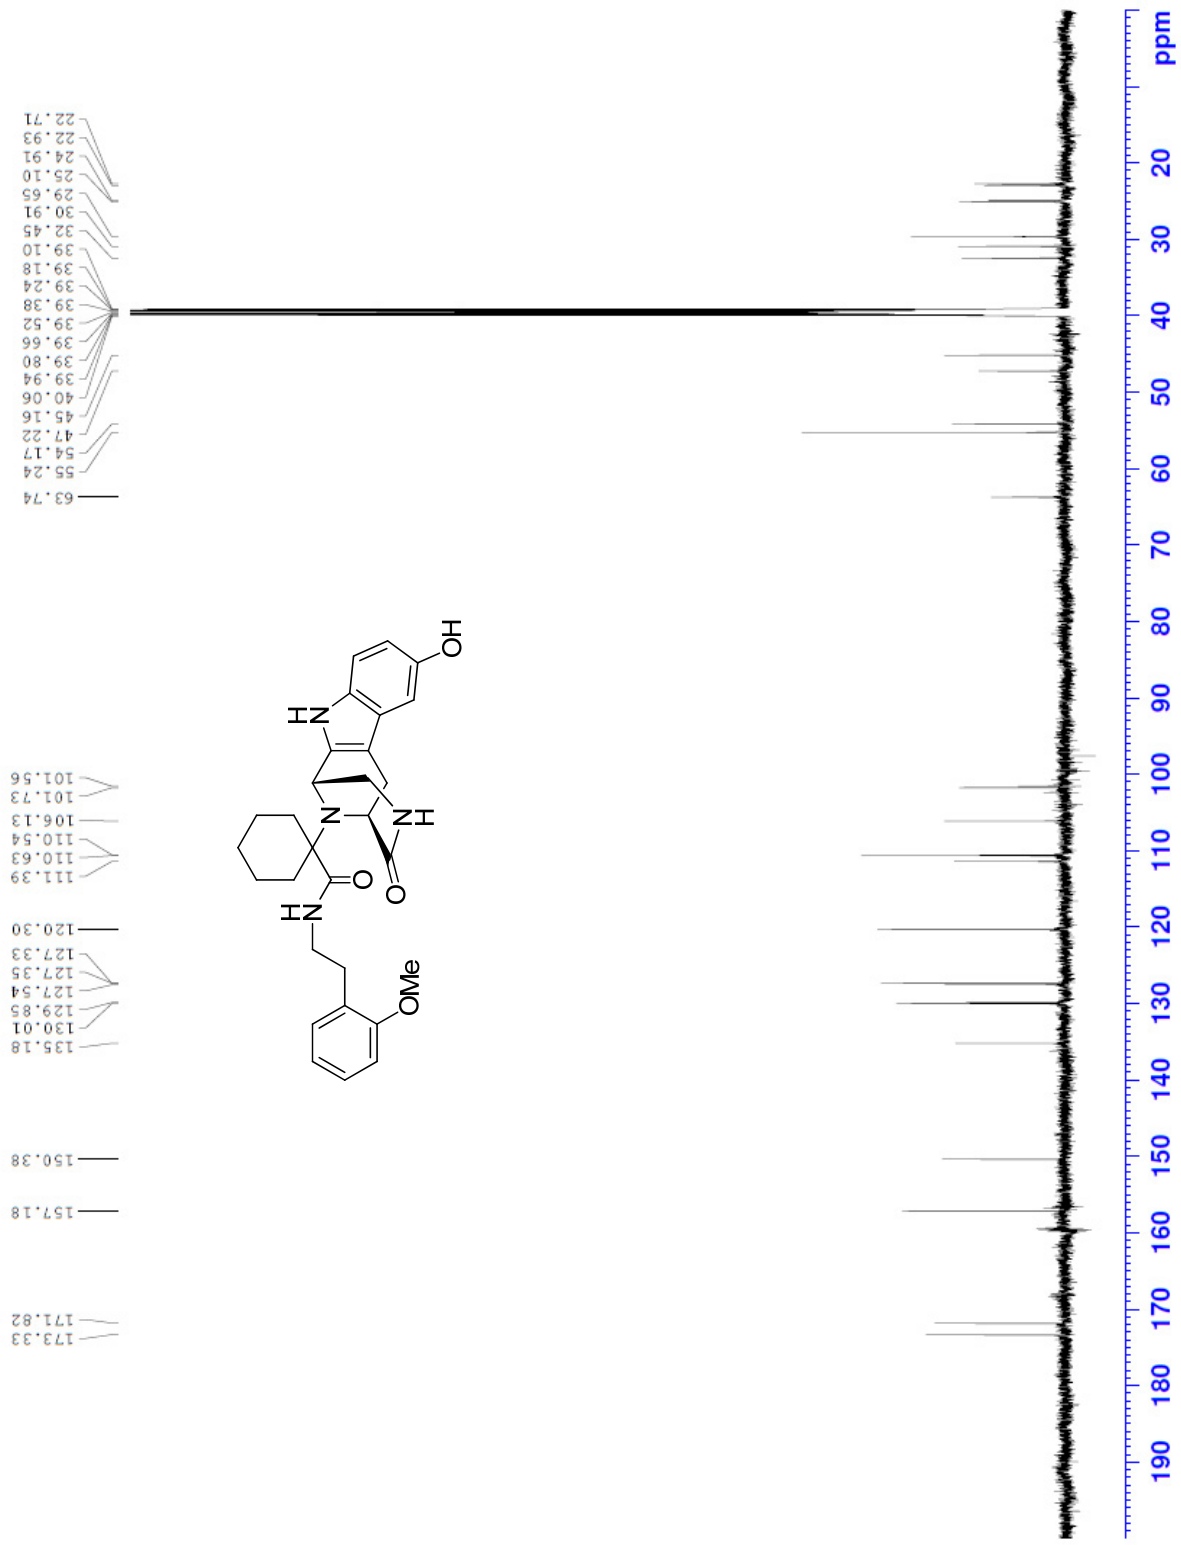

# Compound-26

1: Scan AP+  
TIC  
3.02e7

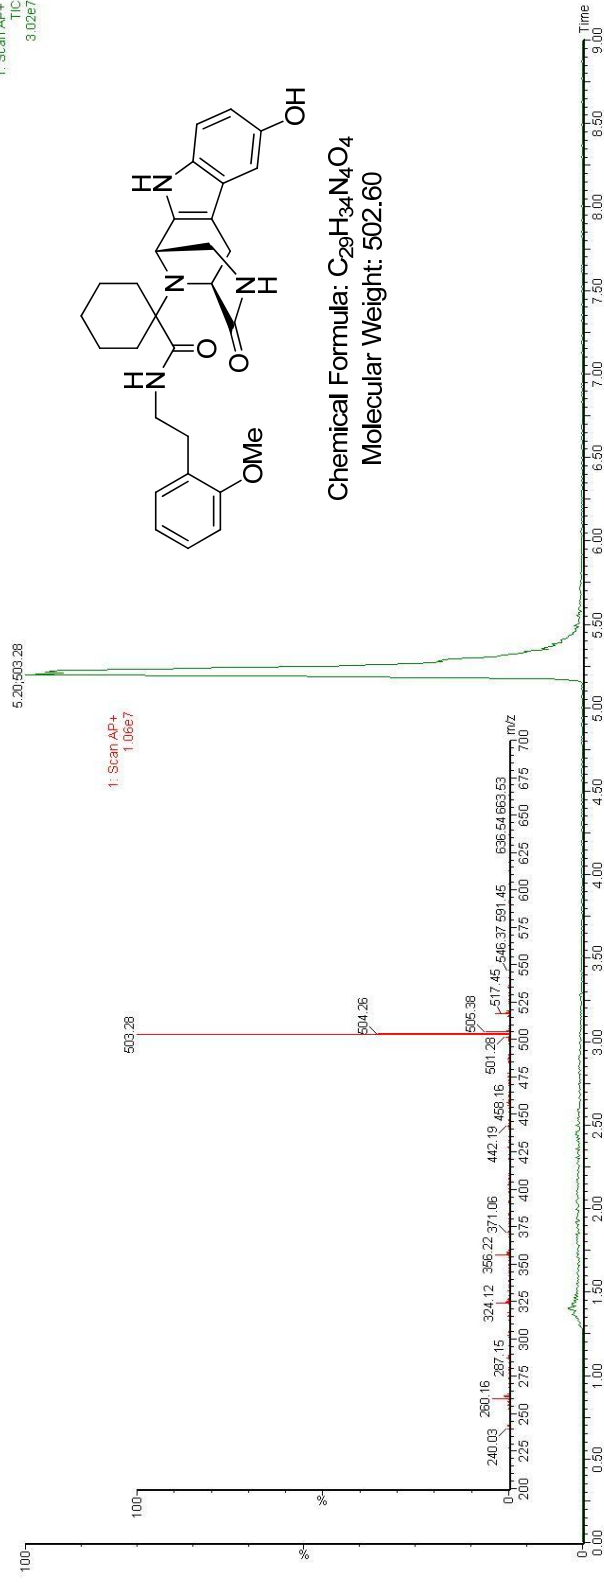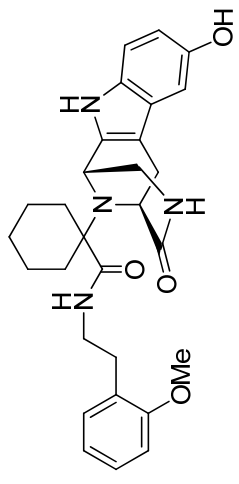

Chemical Formula: C<sub>29</sub>H<sub>34</sub>N<sub>4</sub>O<sub>4</sub>  
Molecular Weight: 502.60

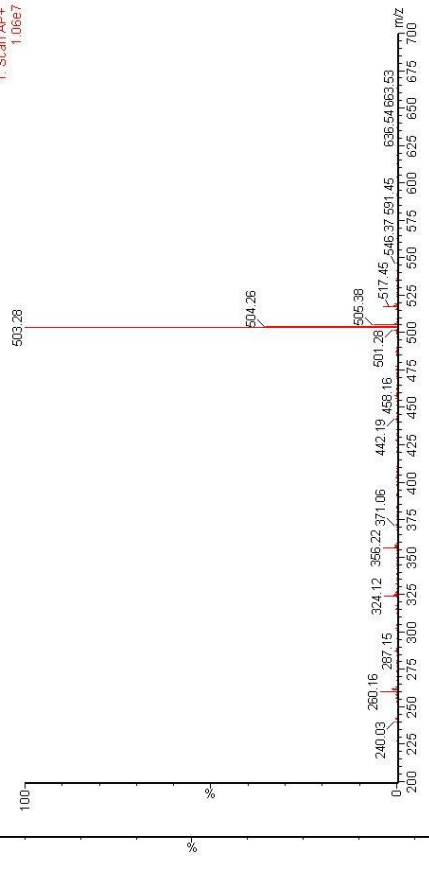



Compound-27

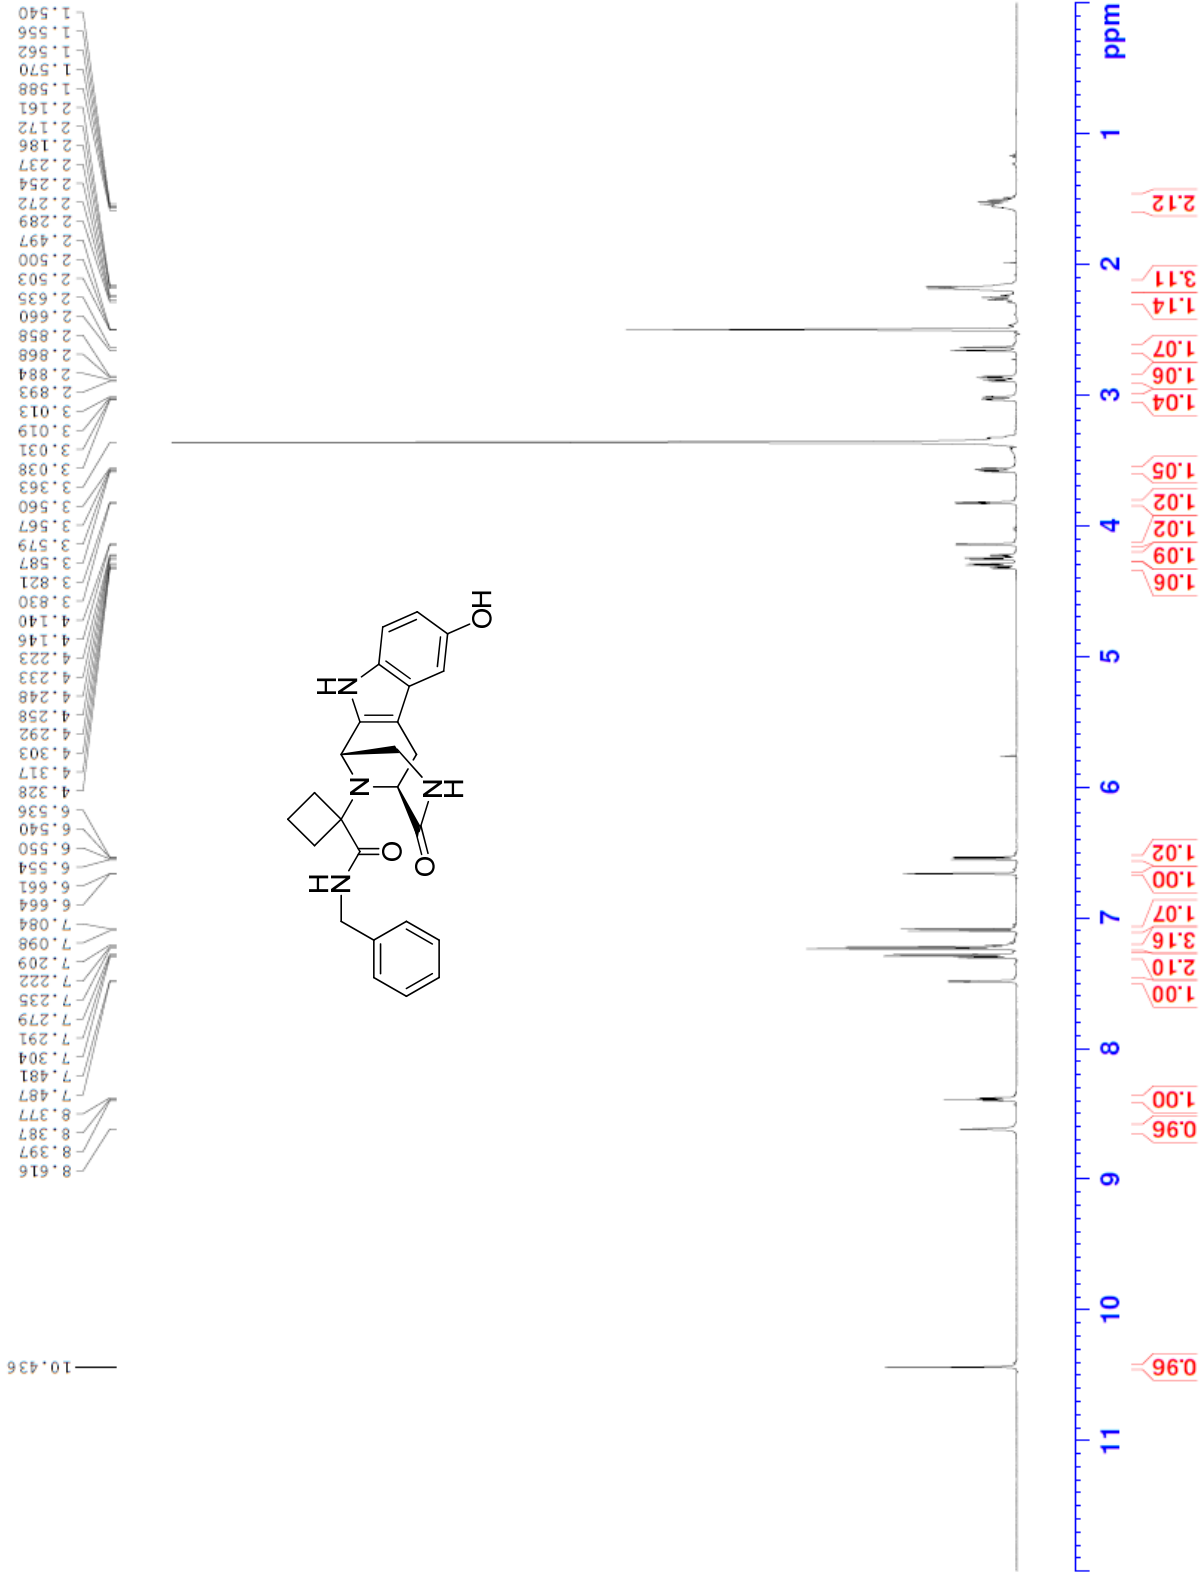

Compound-27

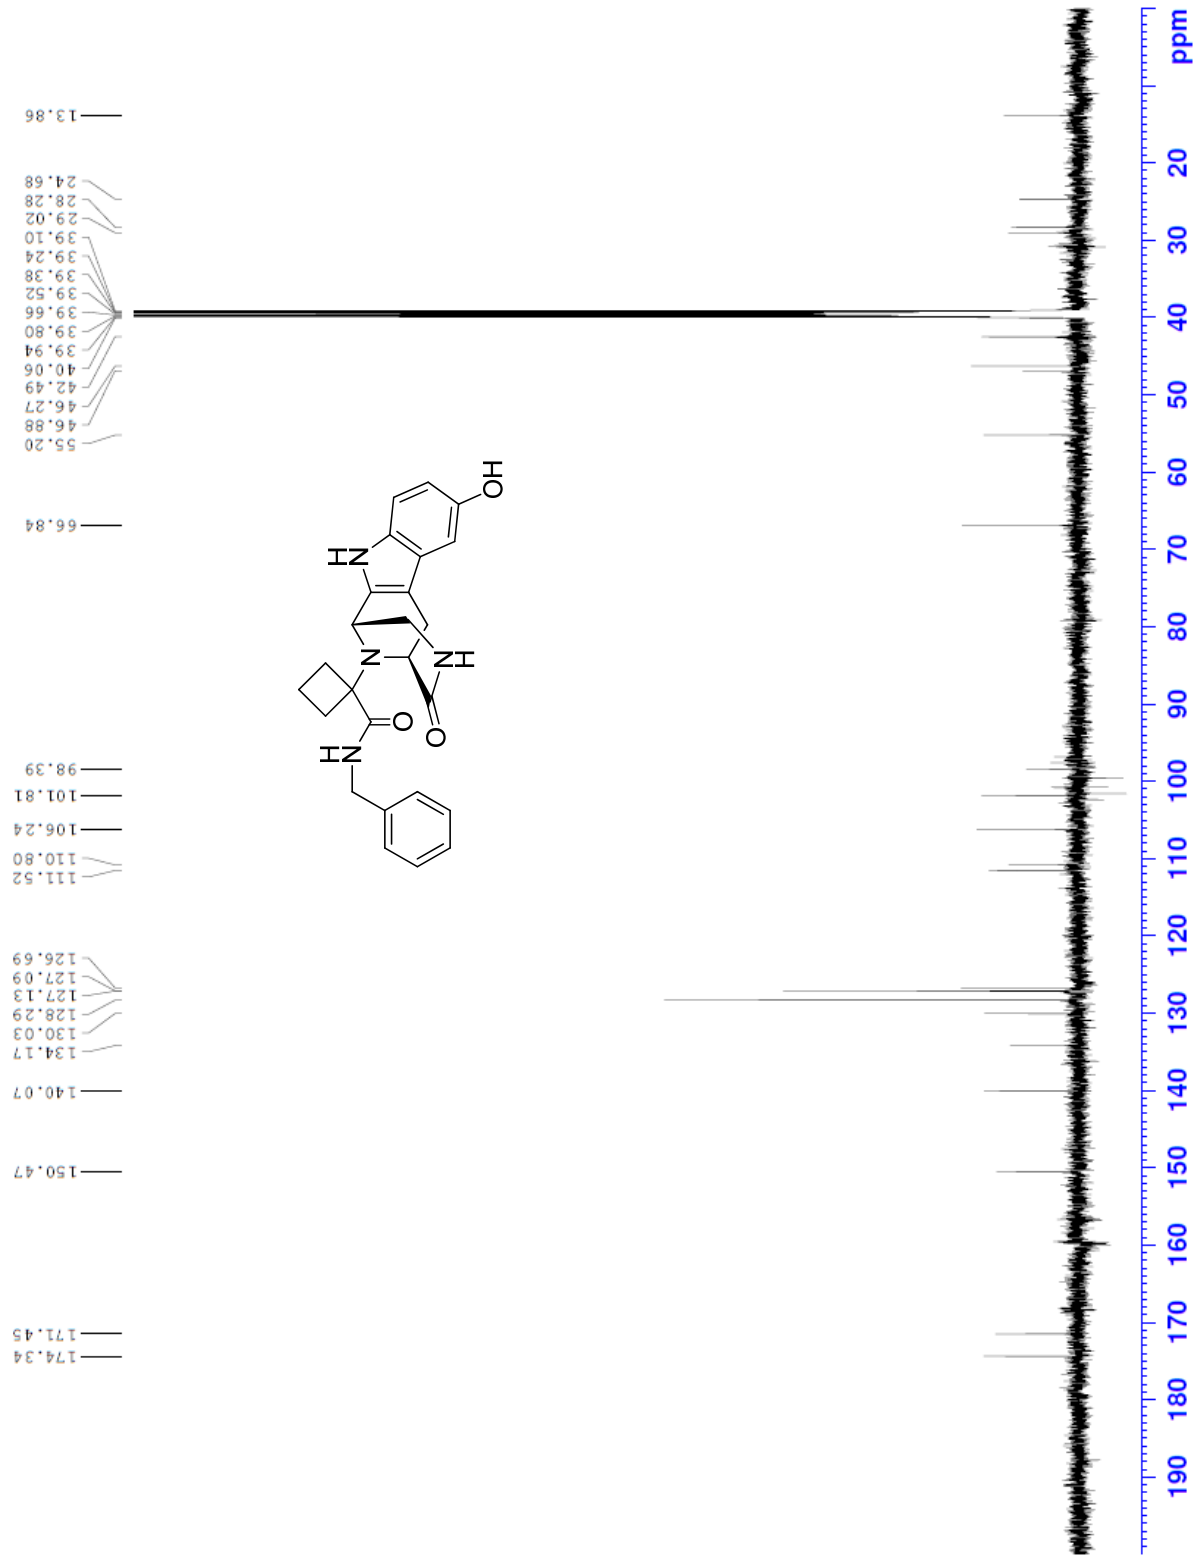

# Compound-27

1: Scan AP+  
TIC  
2.26e7

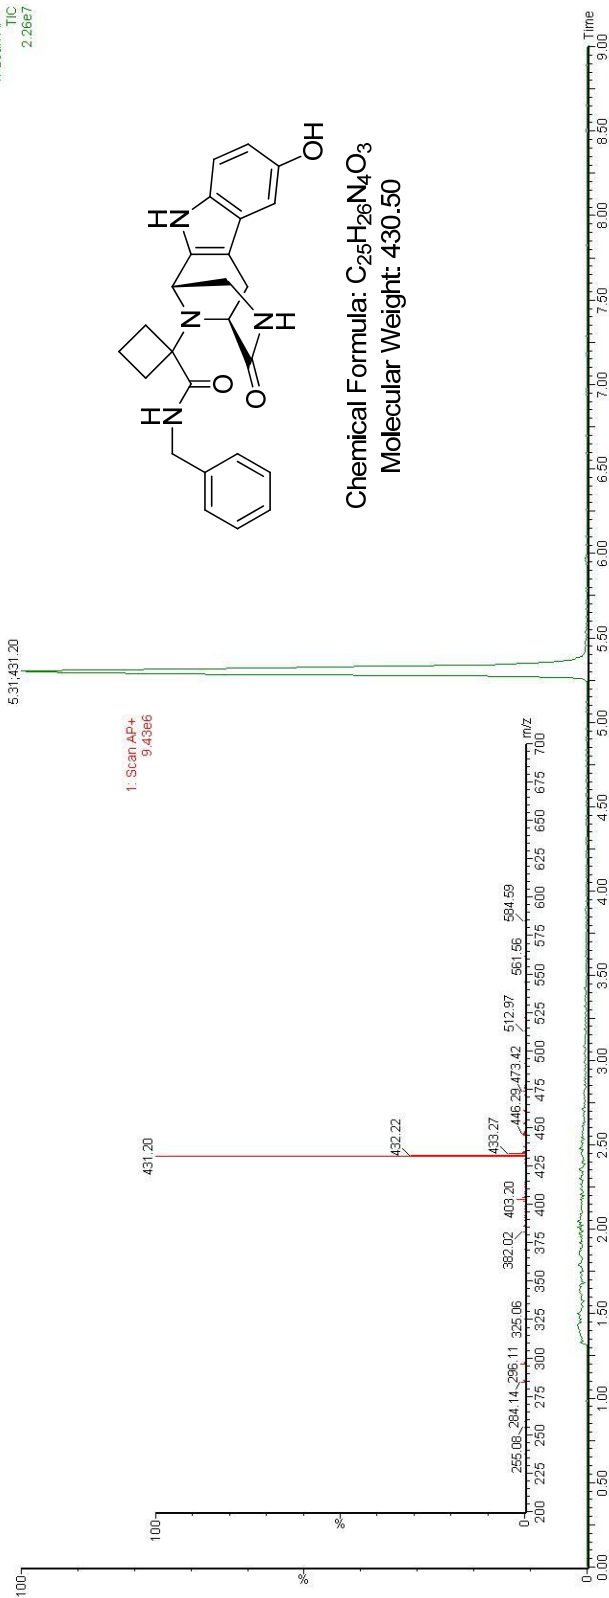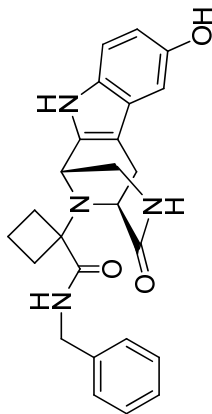

Chemical Formula:  $C_{25}H_{26}N_4O_3$   
Molecular Weight: 430.50

Compound-28, mixture of both diastereomers

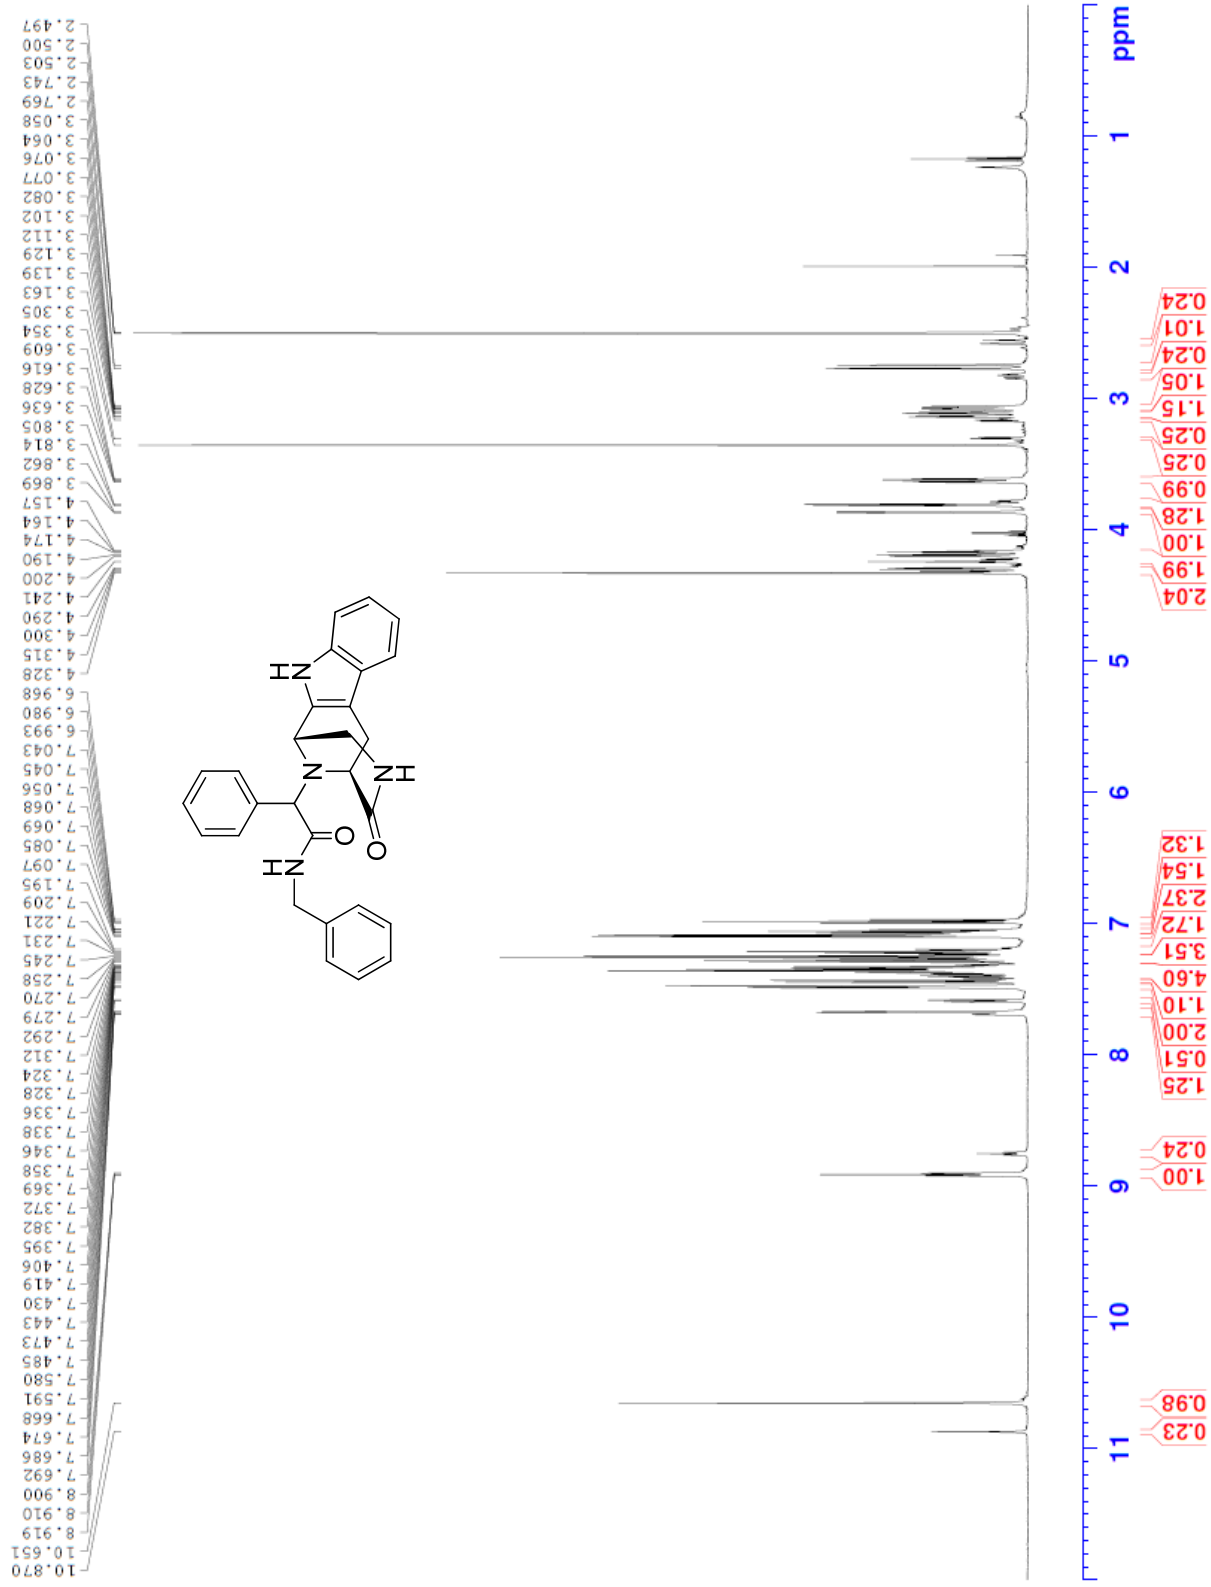

Compound-28, mixture of both diastereomers

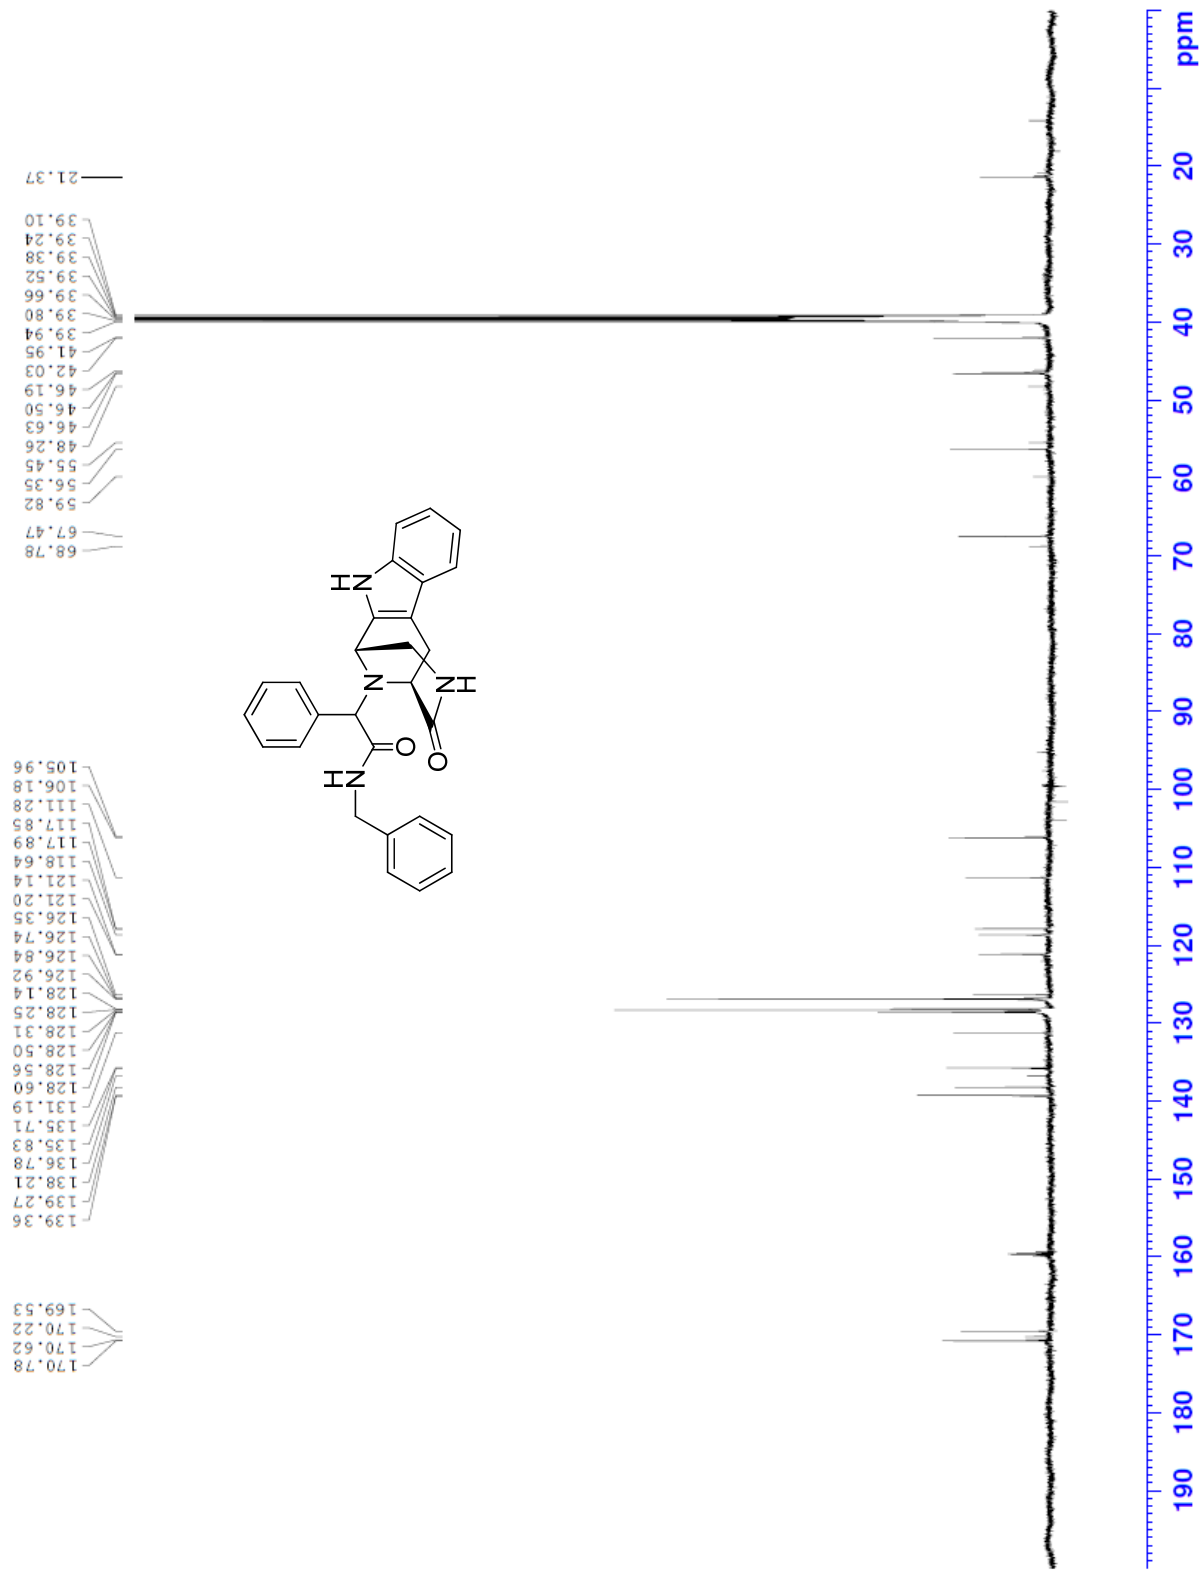

21.37  
39.10  
39.24  
39.38  
39.52  
39.66  
39.80  
39.94  
41.95  
42.03  
46.19  
46.50  
46.63  
48.26  
55.45  
56.35  
59.82  
67.47  
68.78

105.96  
106.18  
111.28  
117.85  
117.89  
118.64  
121.14  
121.20  
126.35  
126.74  
126.84  
126.92  
128.14  
128.25  
128.31  
128.50  
128.56  
128.60  
131.19  
135.71  
135.83  
136.78  
138.21  
139.27  
139.36

169.53  
170.22  
170.62  
170.78

1: Scan AP+  
TIC  
3.7768

### Compound-28, 1<sup>st</sup> diastereomer

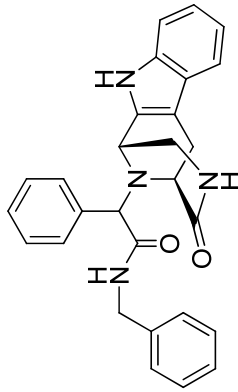

Chemical Formula:  $C_{28}H_{26}N_4O_2$   
Molecular Weight: 450.53

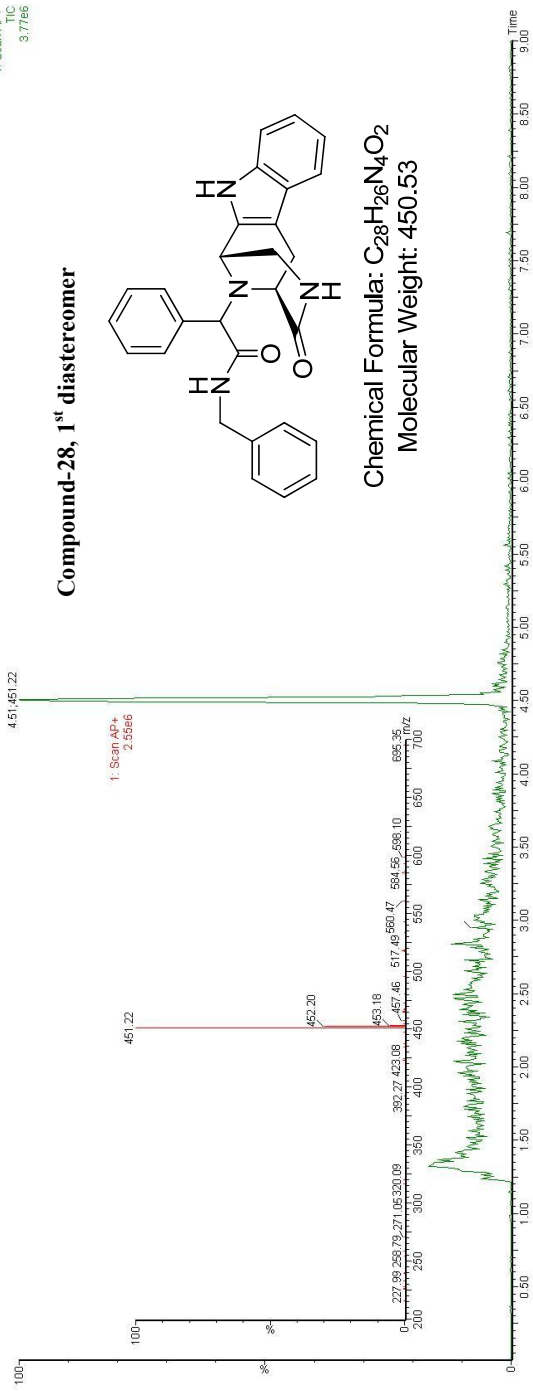

1: Scan AP+  
TIC  
1.7867

### Compound-28, 2<sup>nd</sup> diastereomer

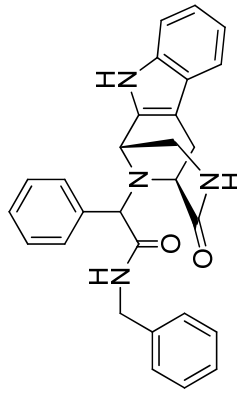

Chemical Formula:  $C_{28}H_{26}N_4O_2$   
Molecular Weight: 450.53

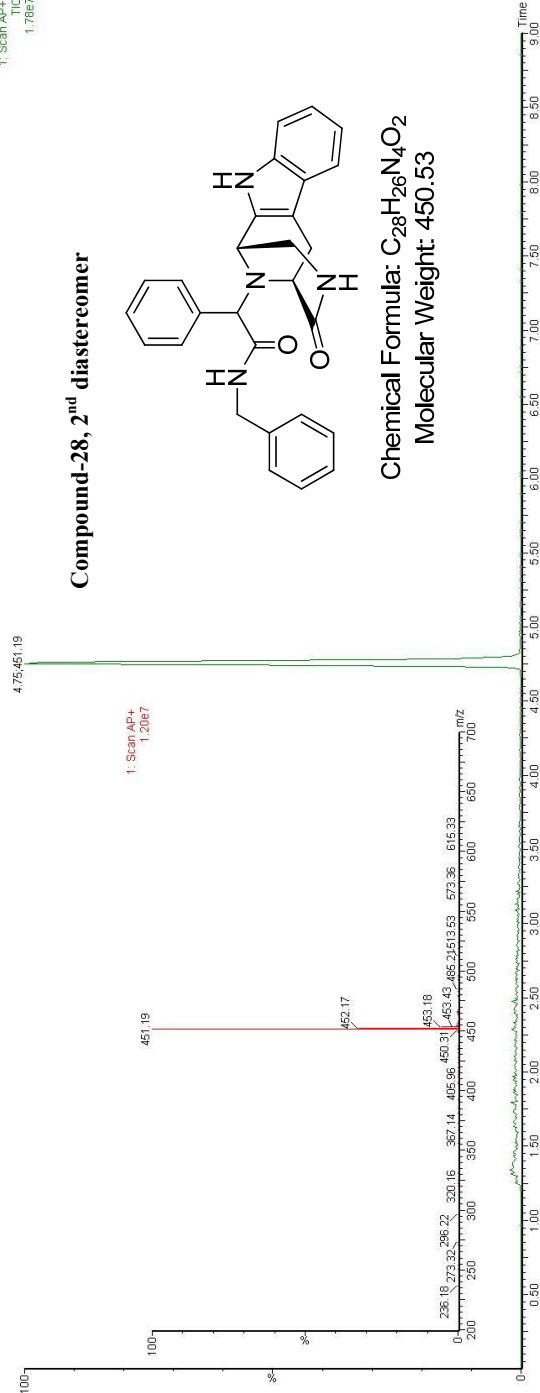

Compound-29, 1<sup>st</sup> diastereomer

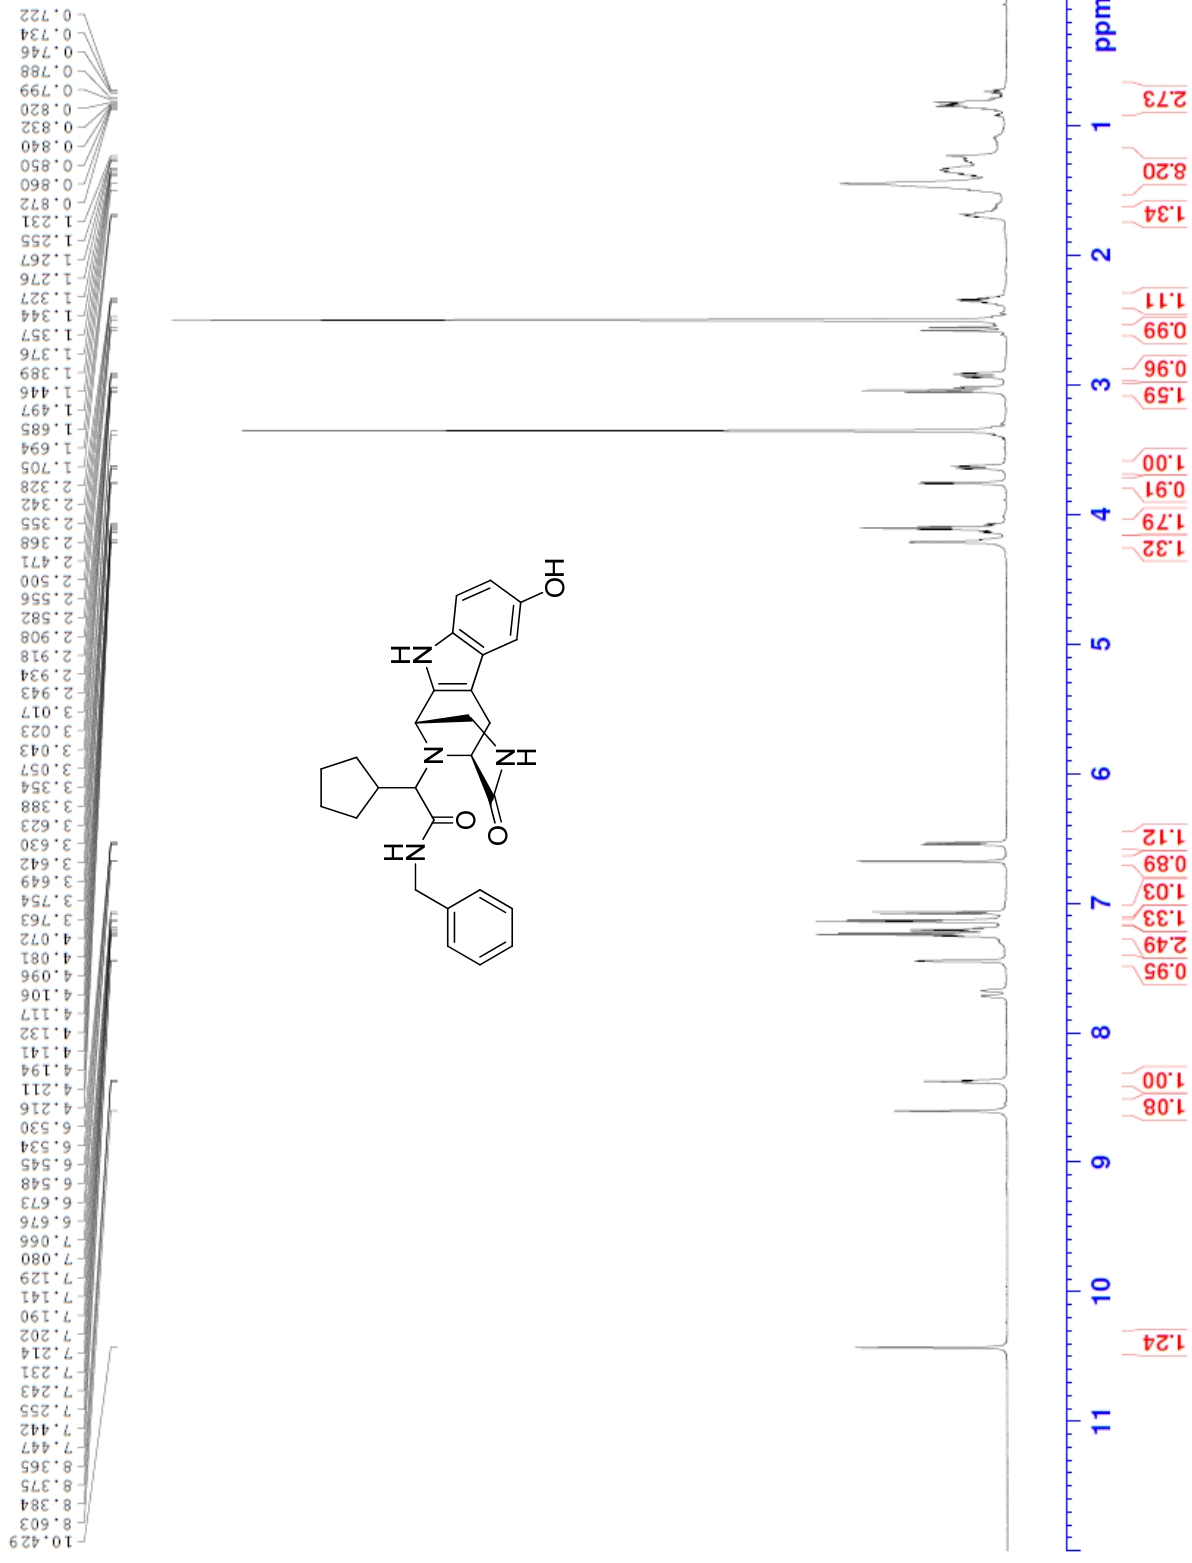

Compound-29, 1<sup>st</sup> diastereomer

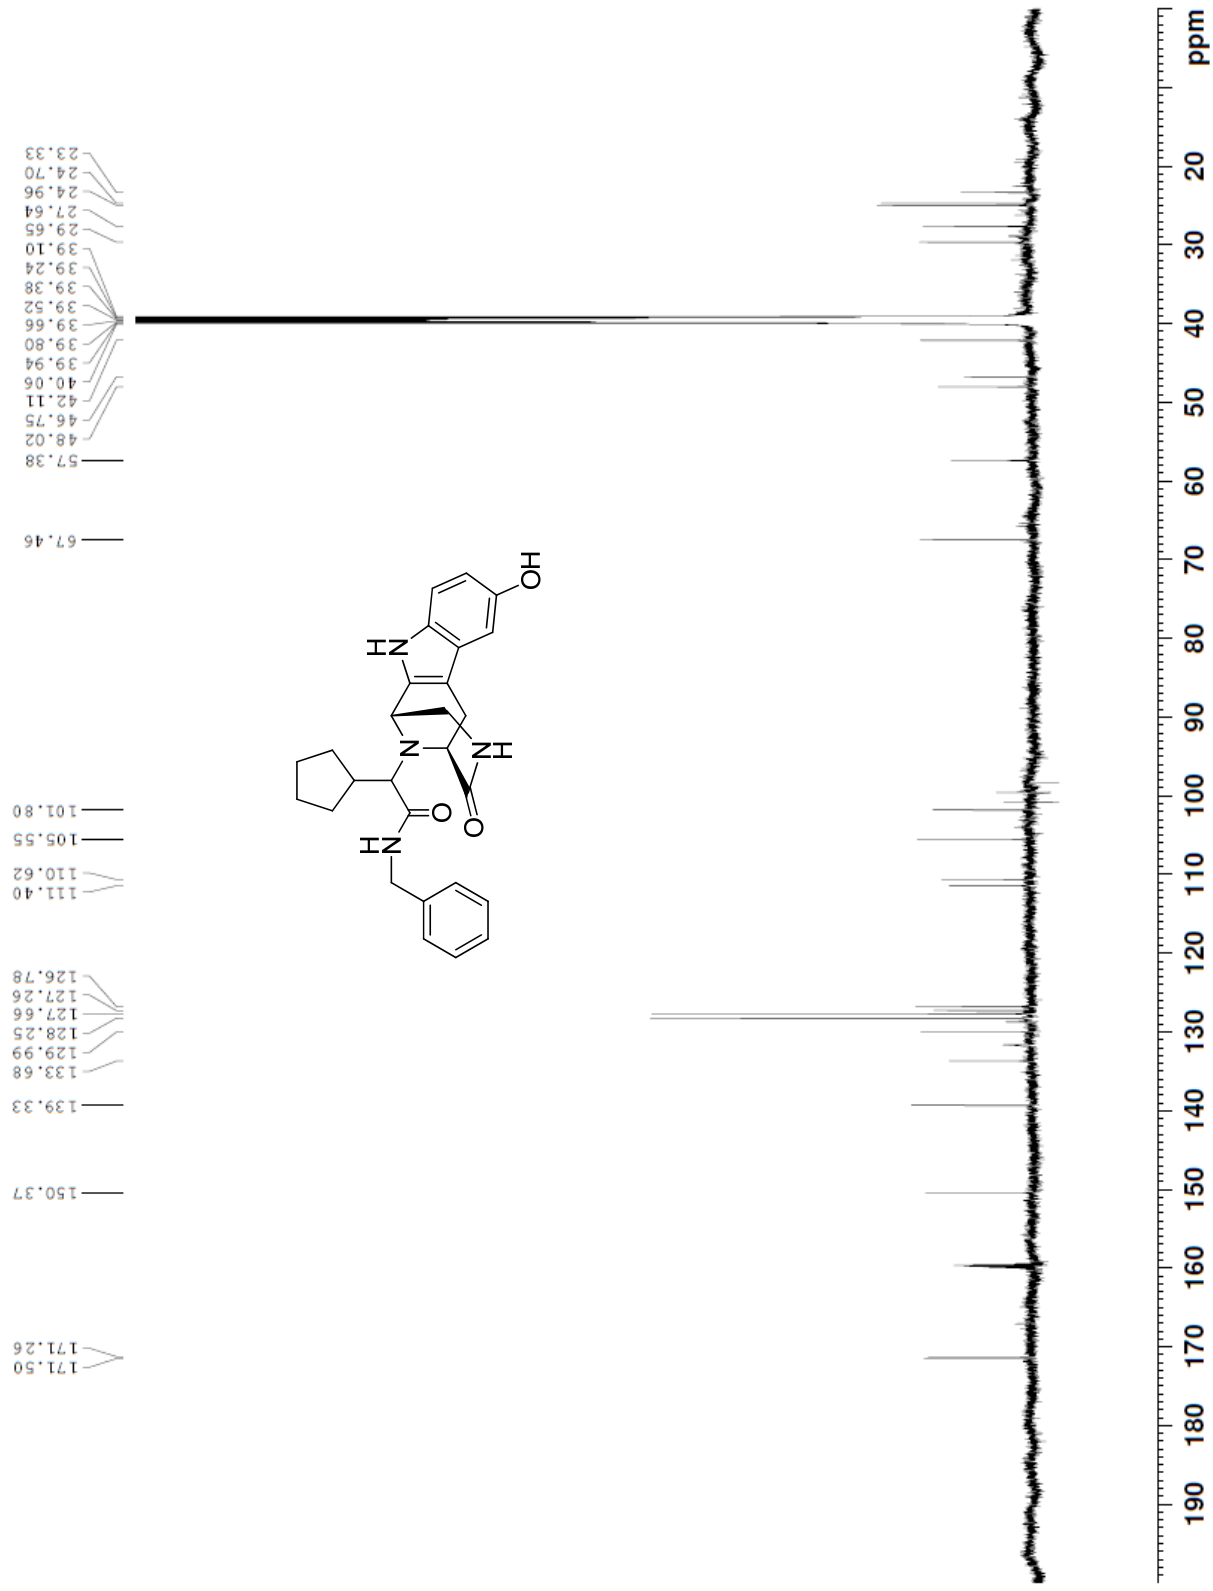



Compound-29, 2<sup>nd</sup> diastereomer

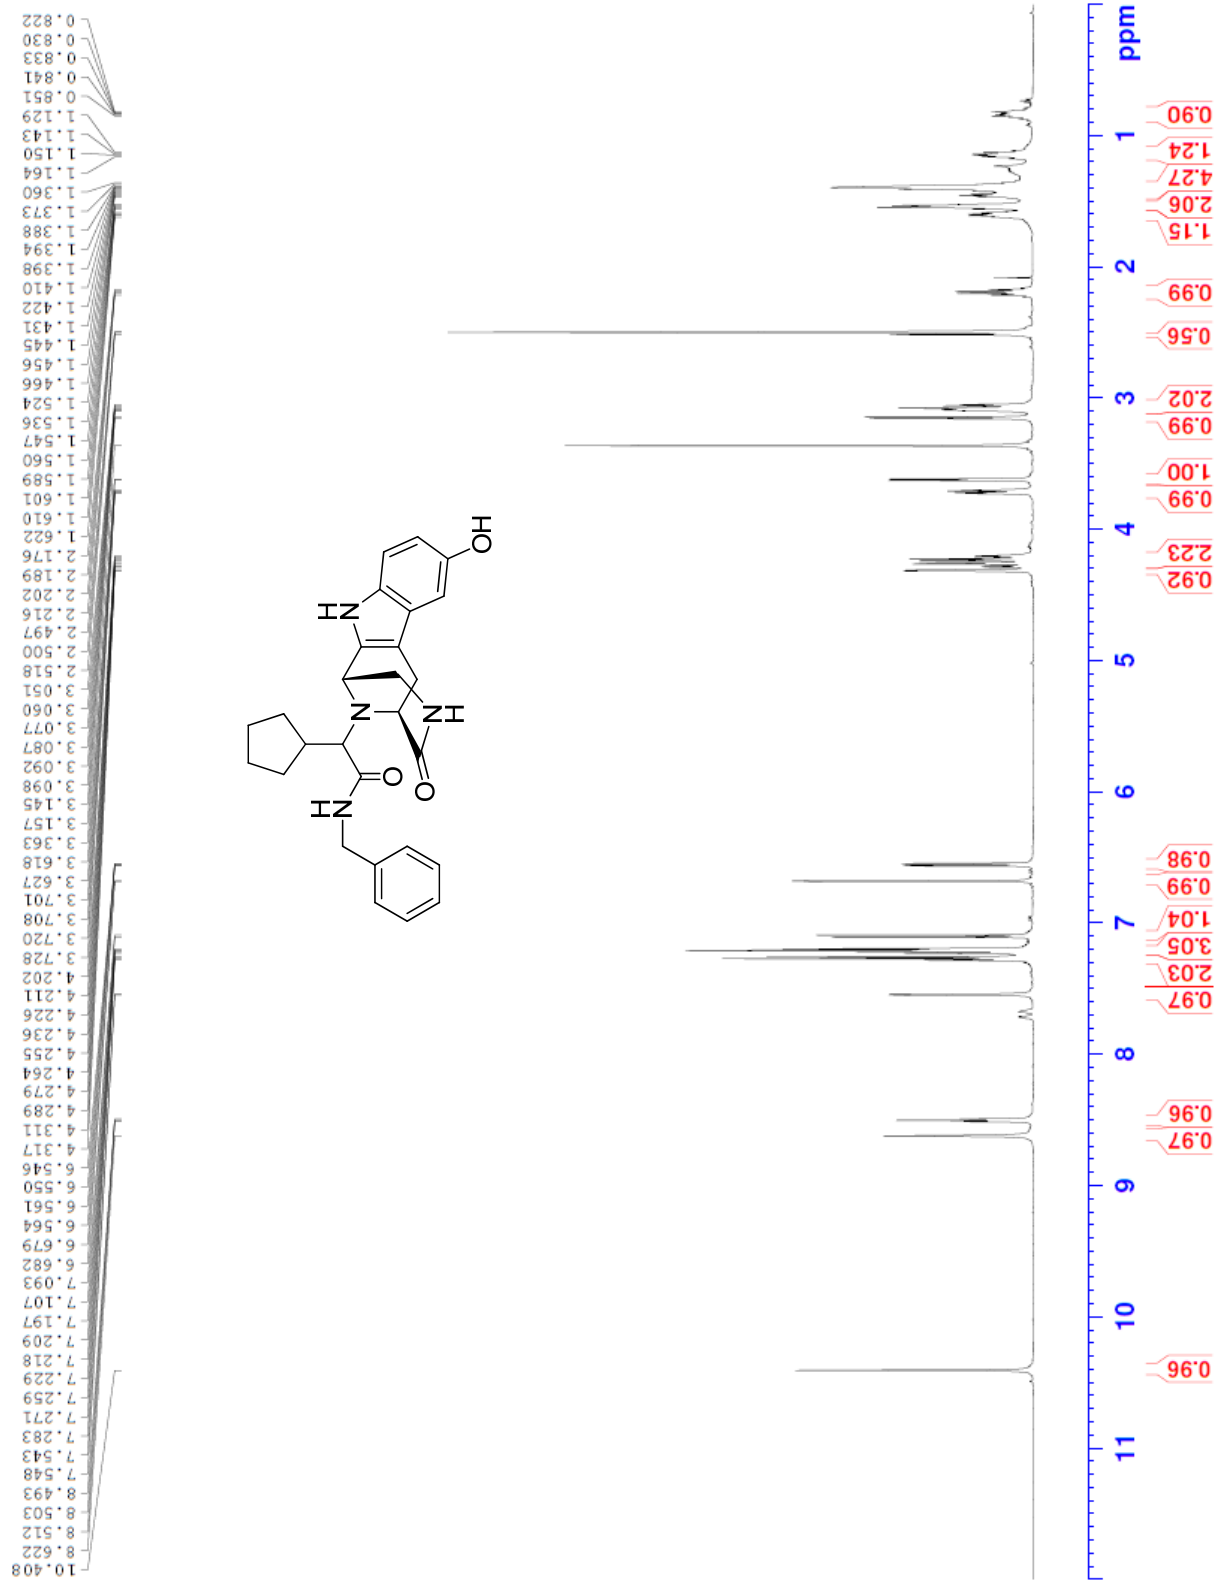

Compound-29, 2<sup>nd</sup> diastereomer

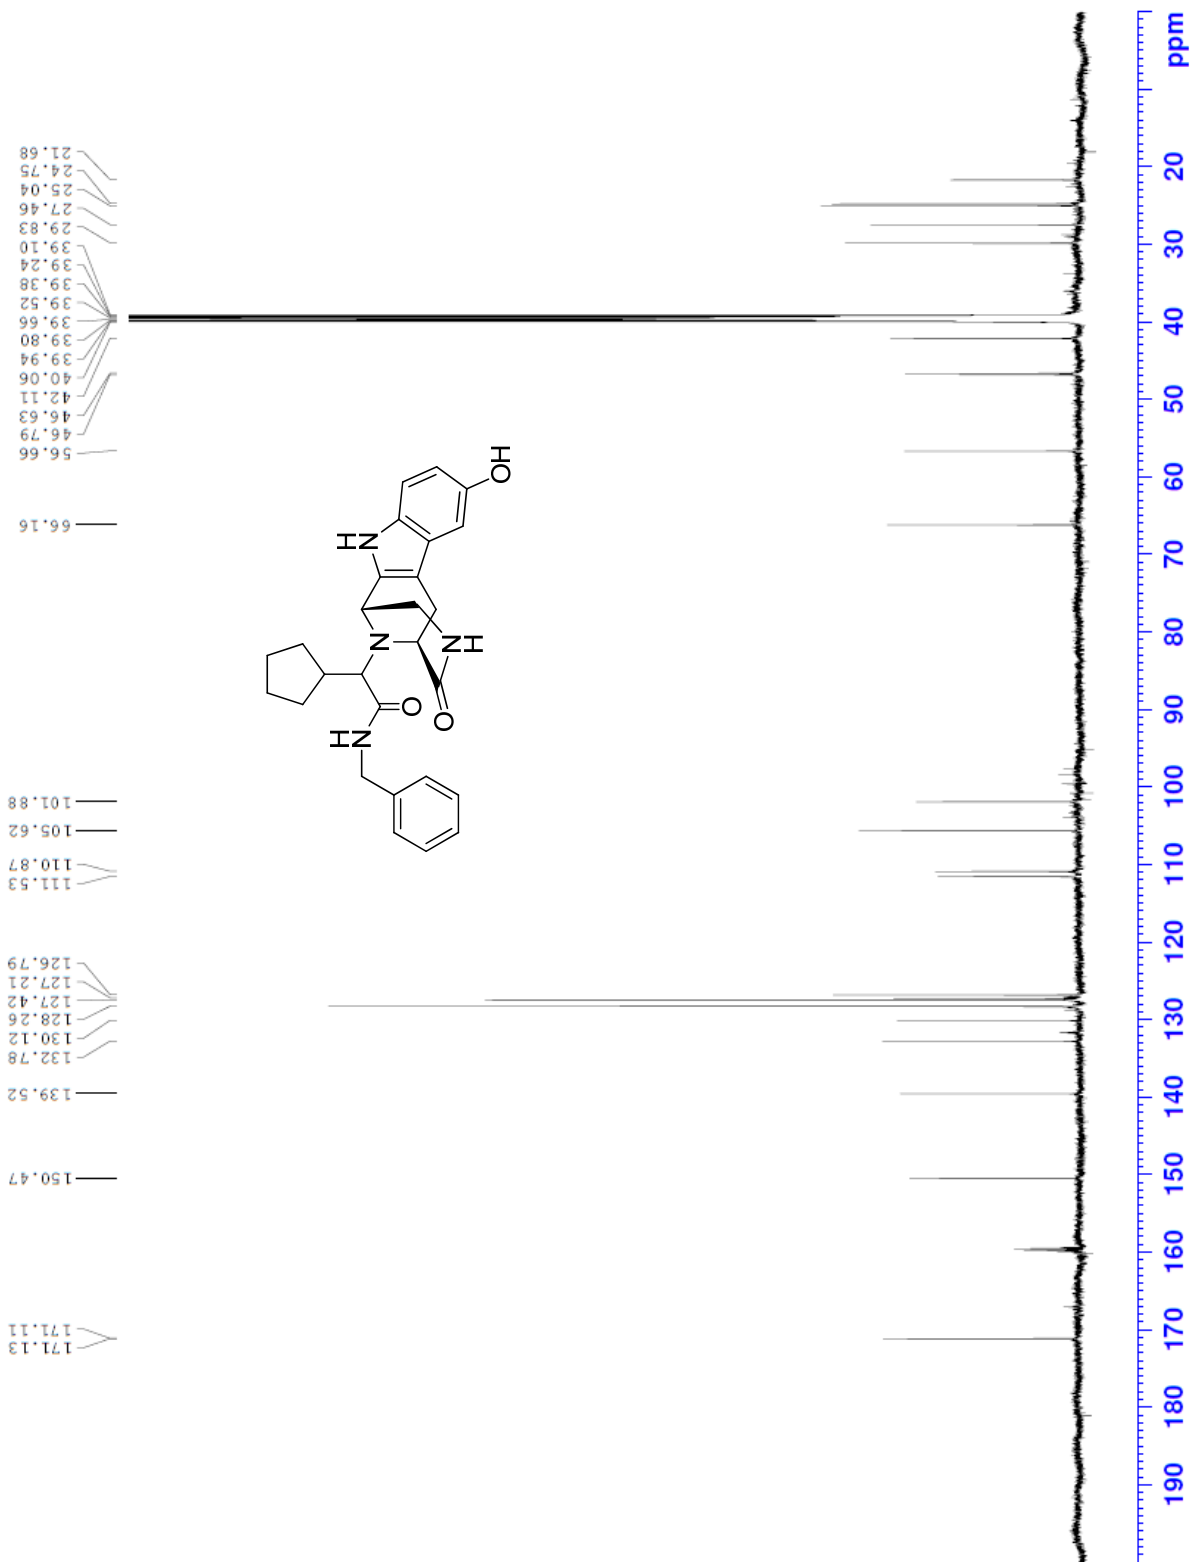

1: Scan AP+  
TIC  
2.4066

### Compound-29, 1<sup>st</sup> diastereomer

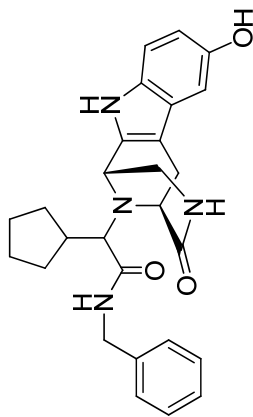

Chemical Formula:  $C_{27}H_{30}N_4O_3$   
Molecular Weight: 458.55

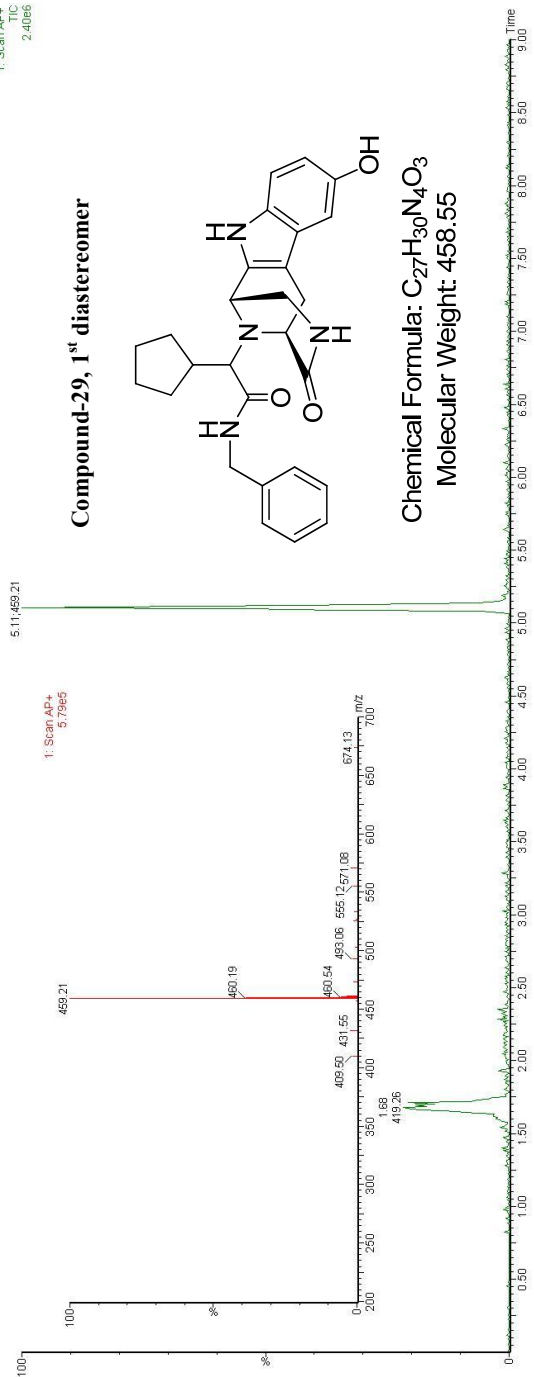

1: Scan AP+  
TIC  
2.4967

### Compound-29, 2<sup>nd</sup> diastereomer

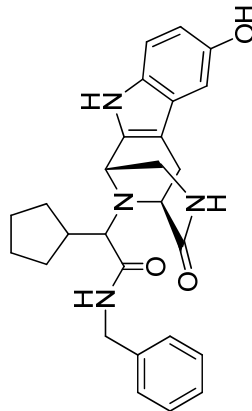

Chemical Formula:  $C_{27}H_{30}N_4O_3$   
Molecular Weight: 458.55

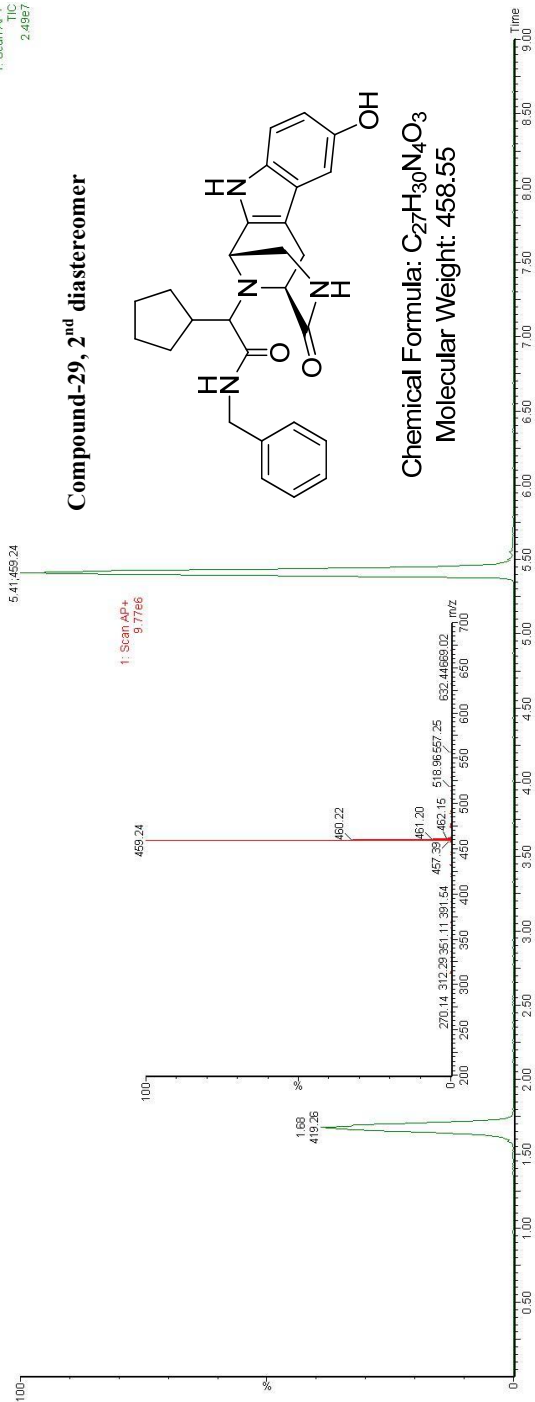

Compound-30

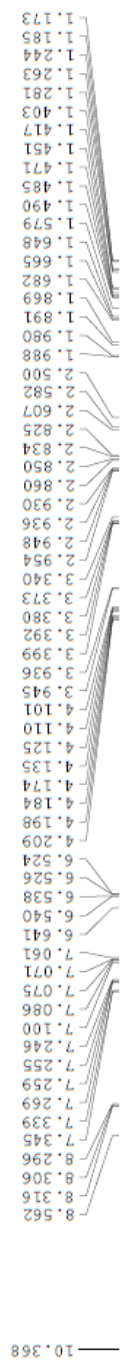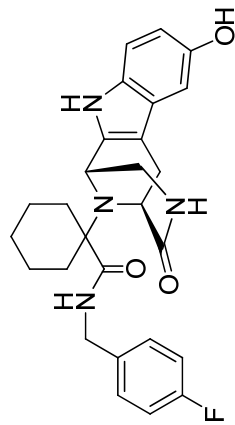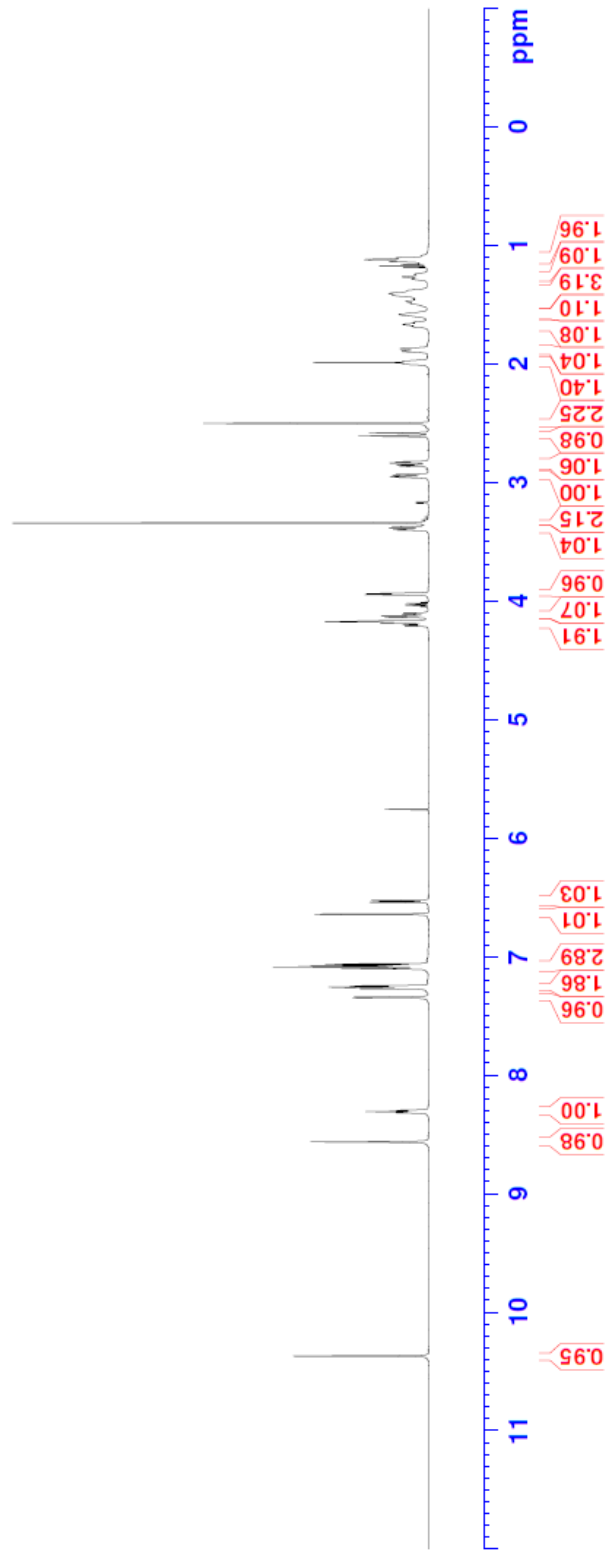

Compound-30

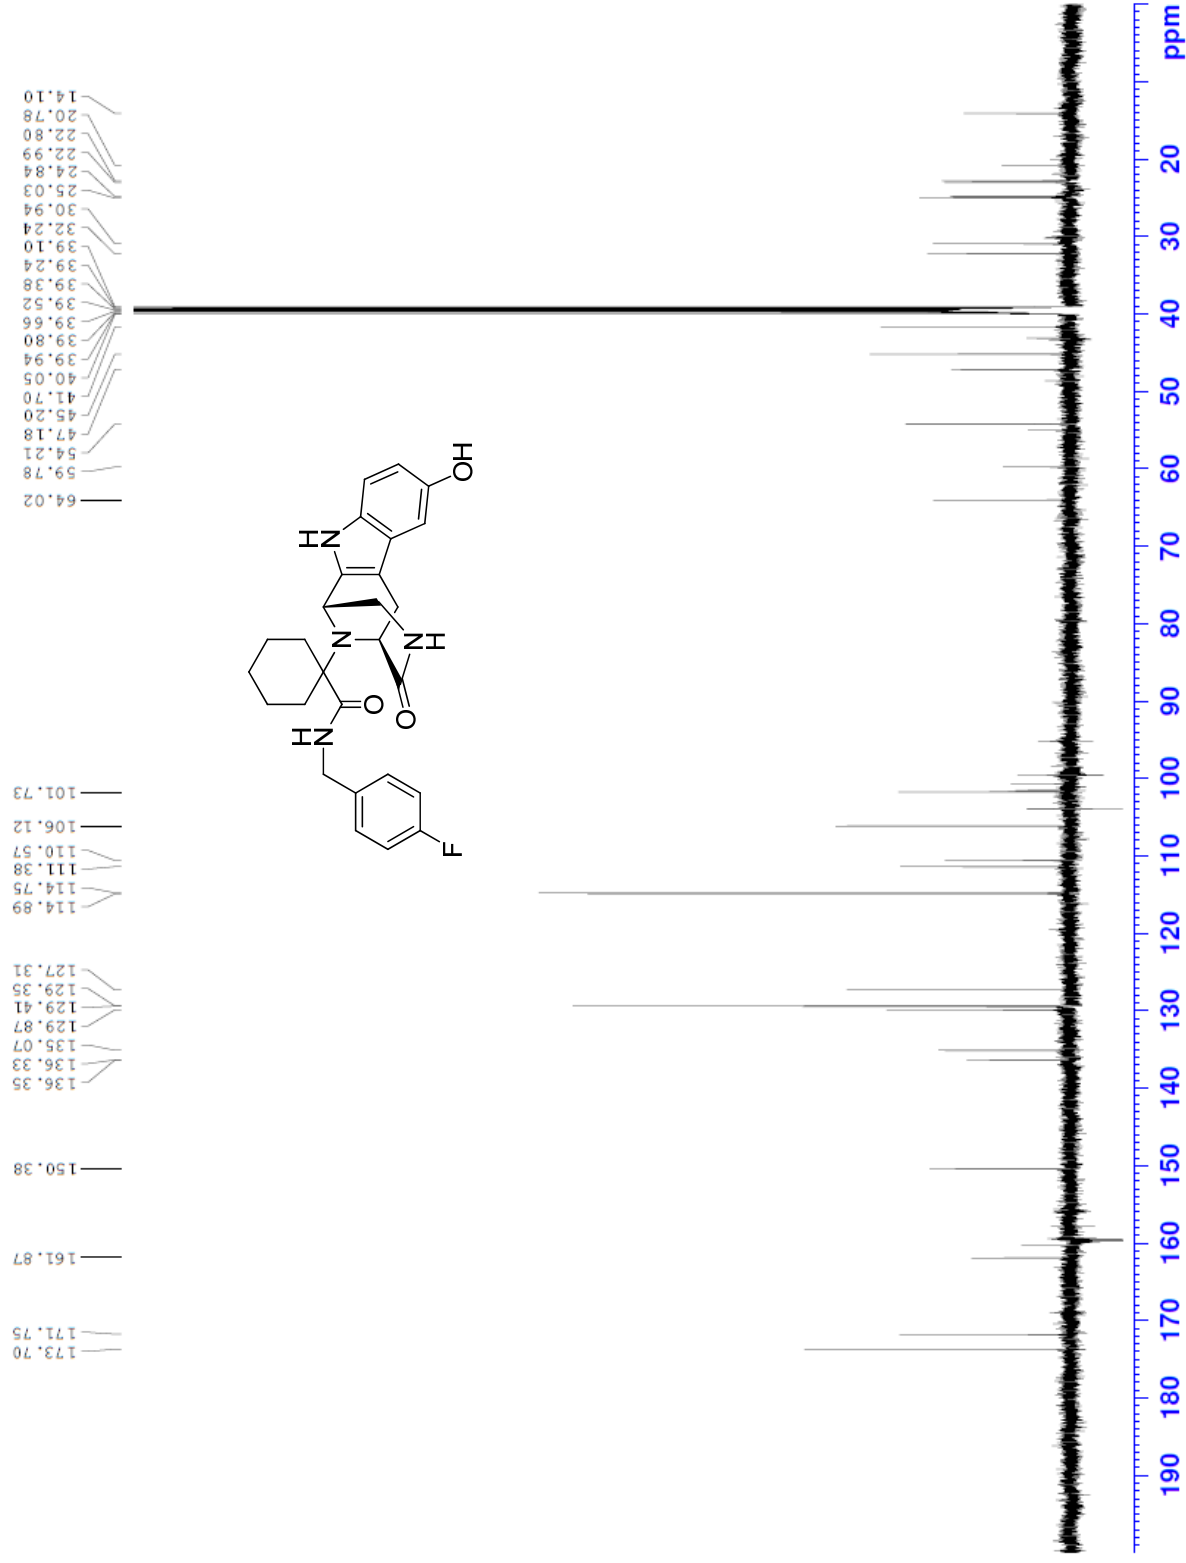

# Compound-30

1: Scan AP+  
TIC  
1.44e7

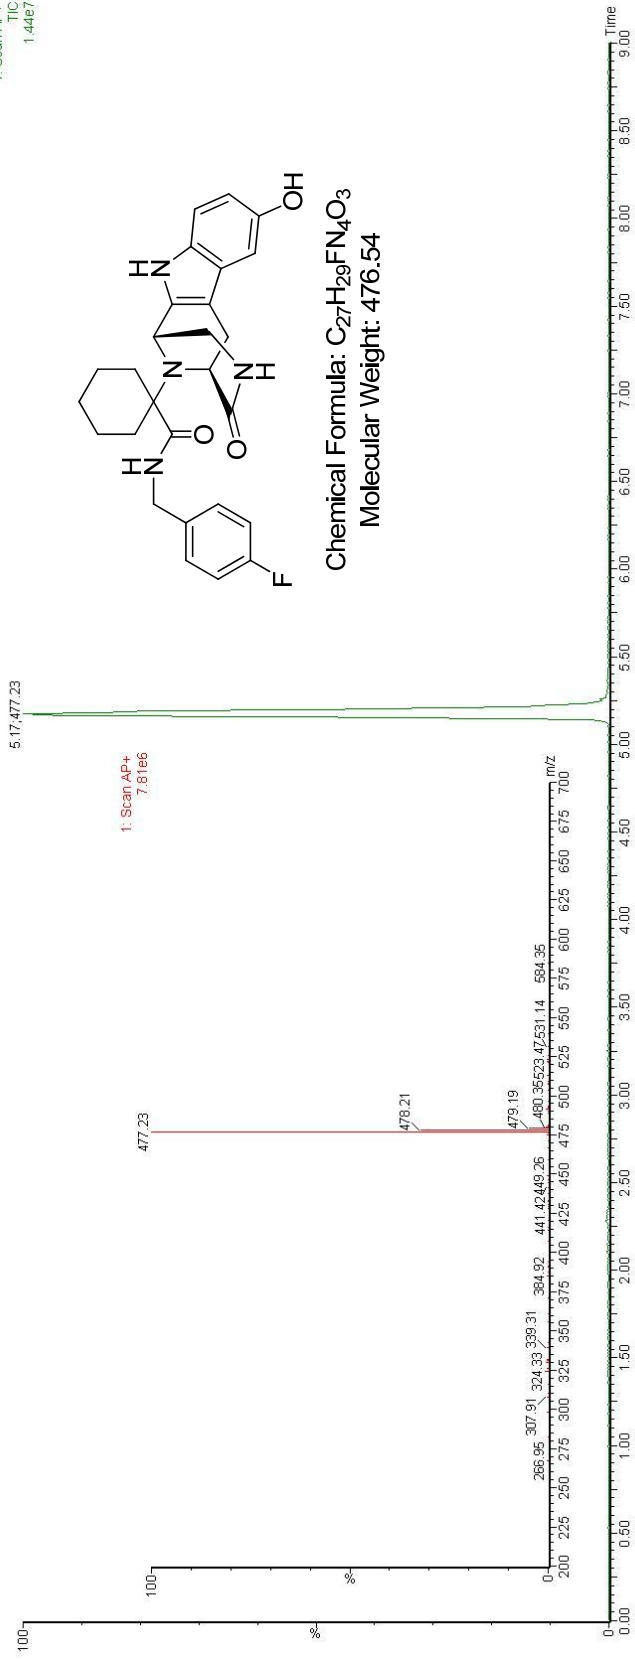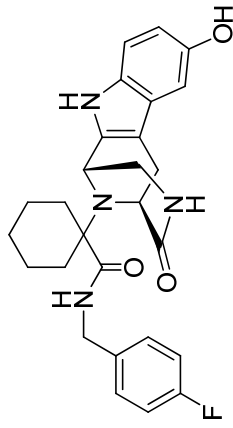

Chemical Formula:  $C_{27}H_{29}FN_4O_3$   
Molecular Weight: 476.54



Compound-31

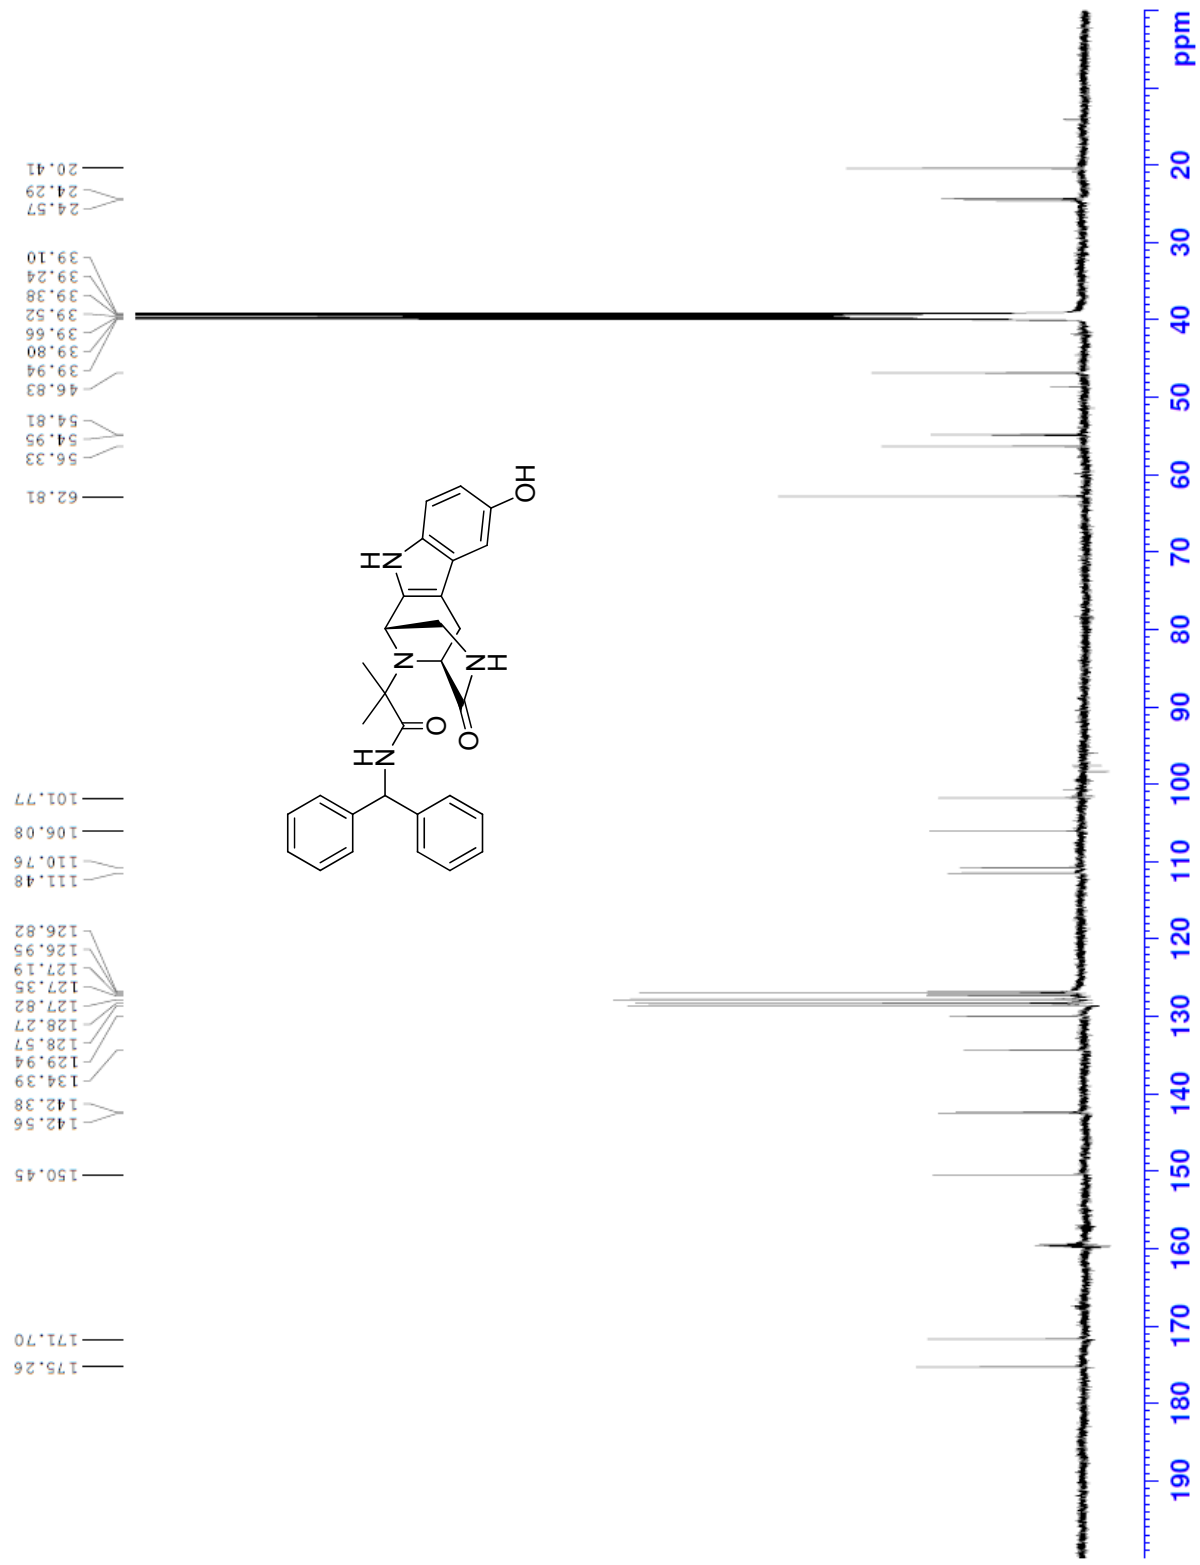



# Compound-31

1: Scan AP+  
TIC  
3.34e7

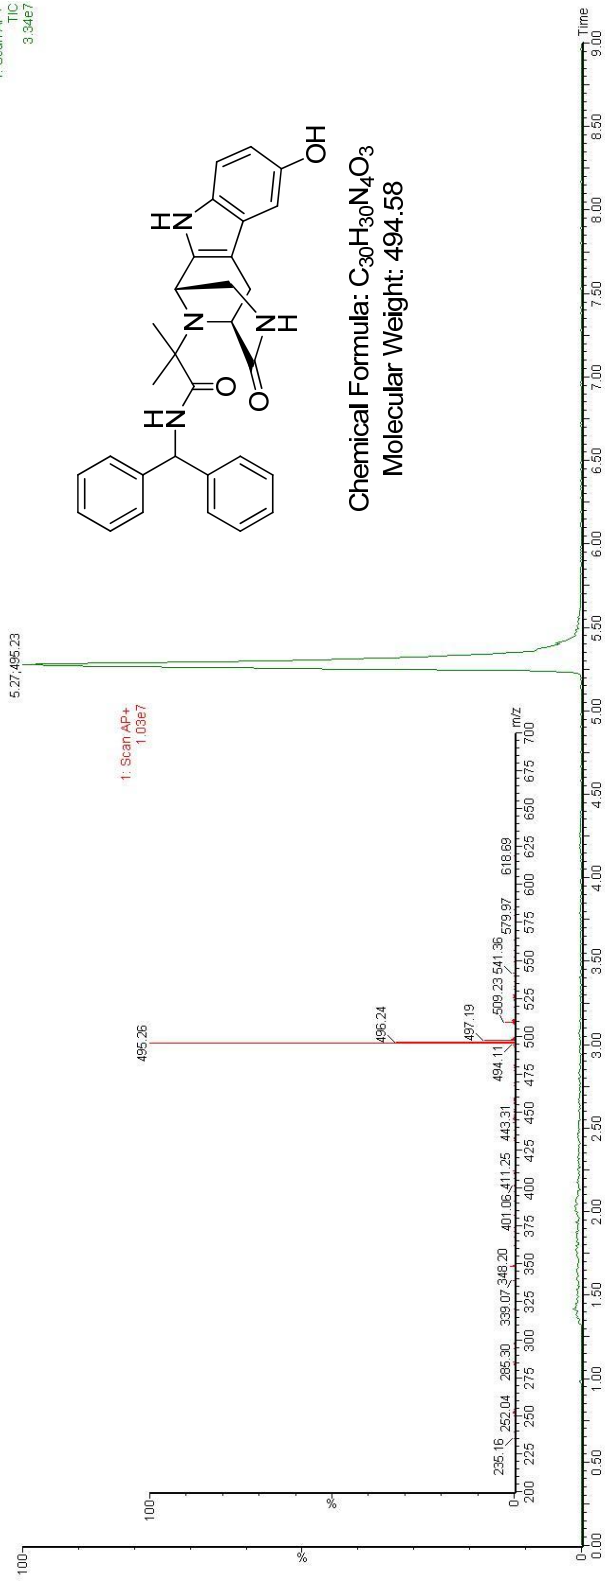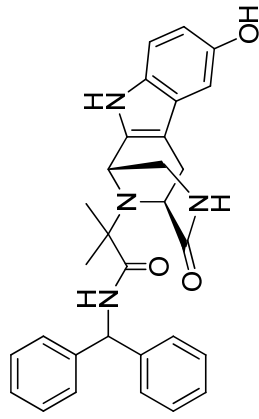

Chemical Formula: C<sub>30</sub>H<sub>30</sub>N<sub>4</sub>O<sub>3</sub>  
Molecular Weight: 494.58

Compound-32

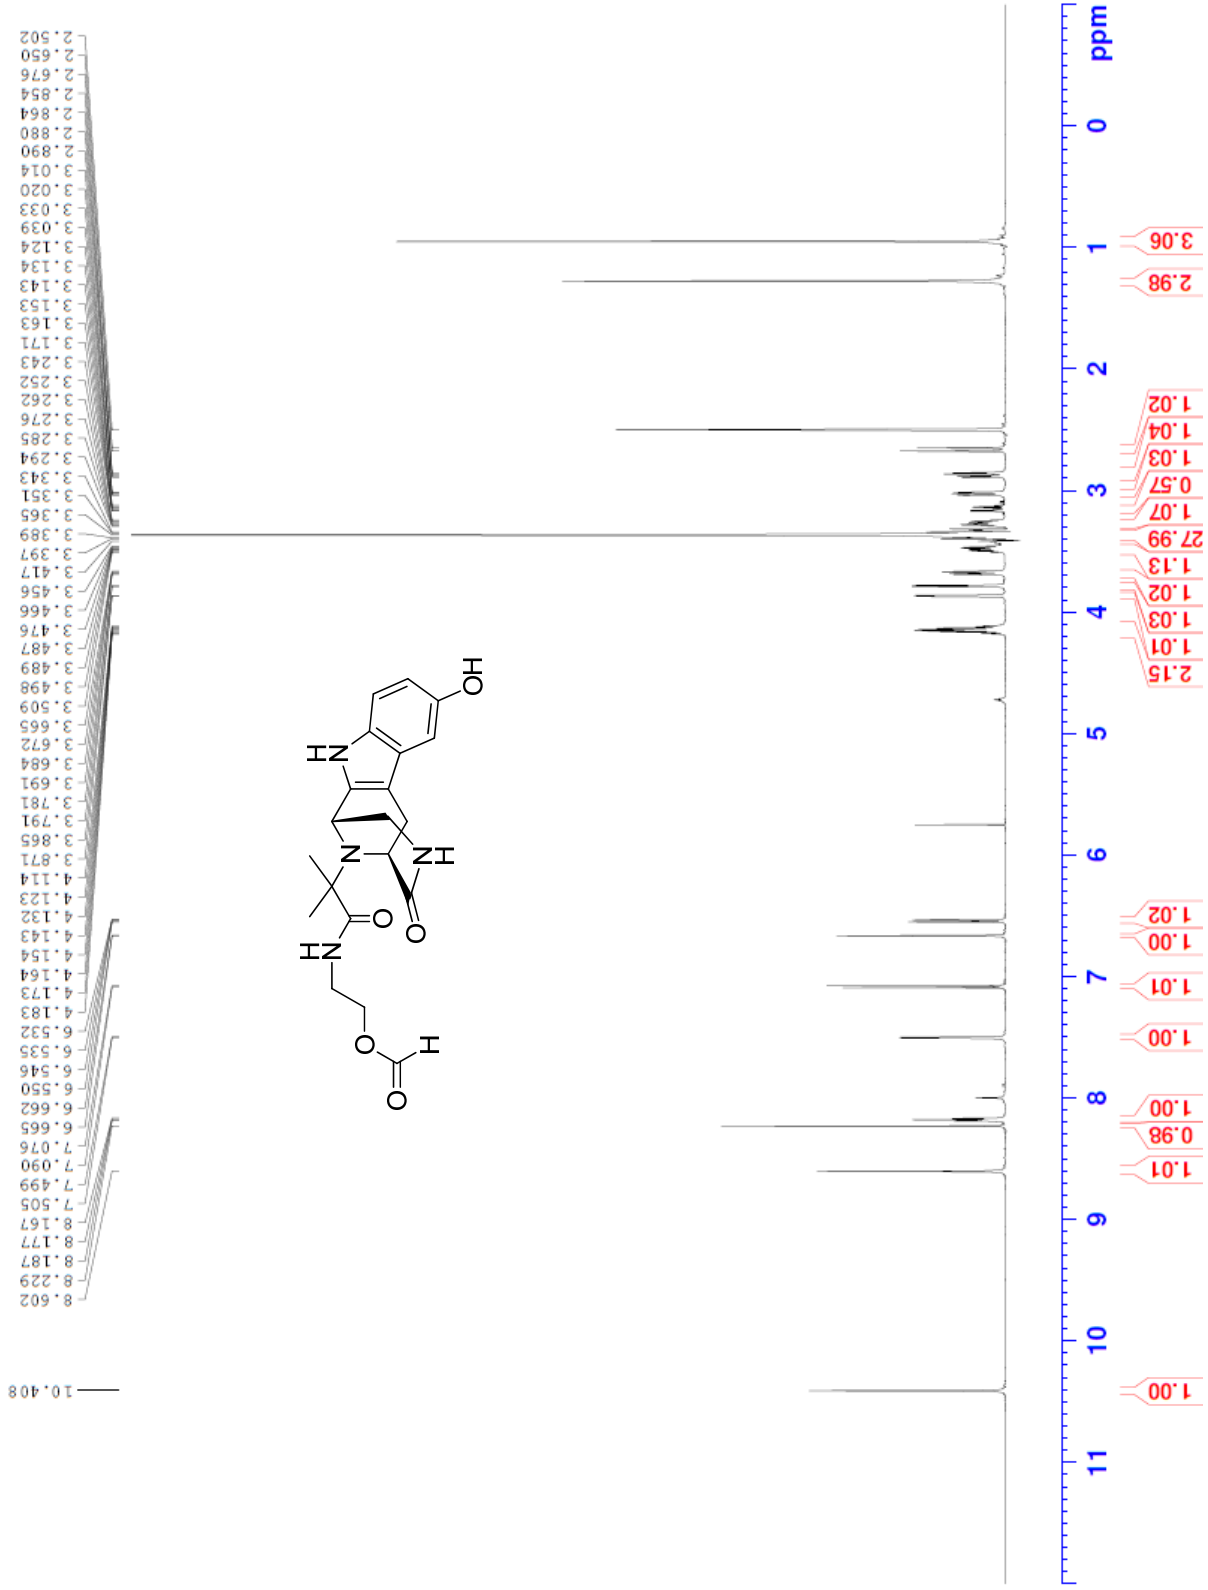

Compound-32

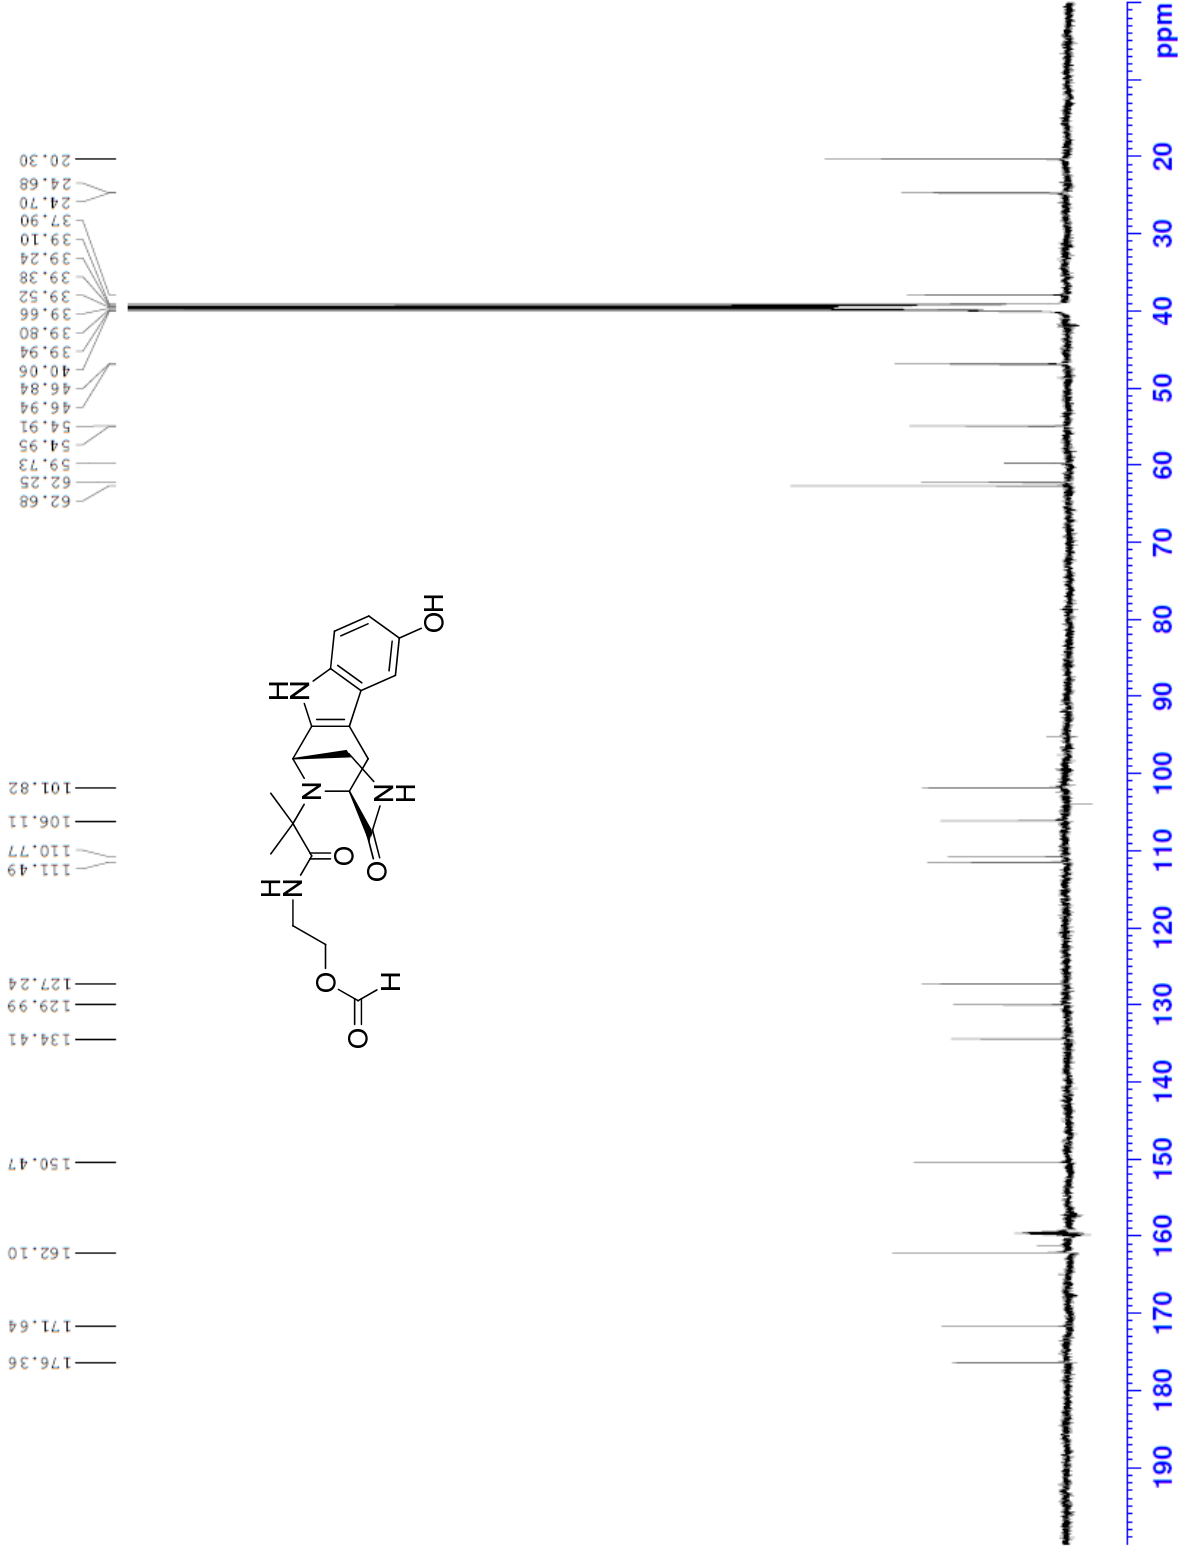

# Compound-32

1: Scan AP+  
TIC  
7.62e6

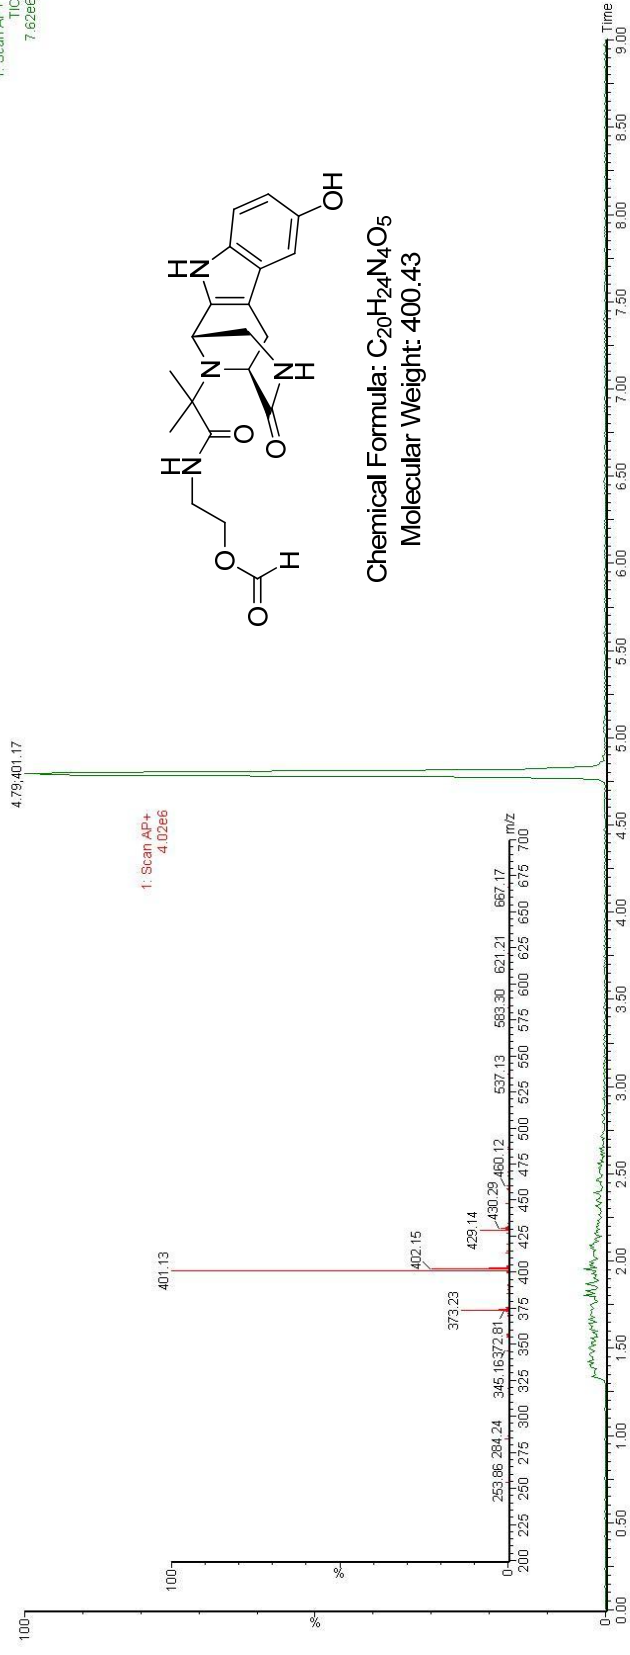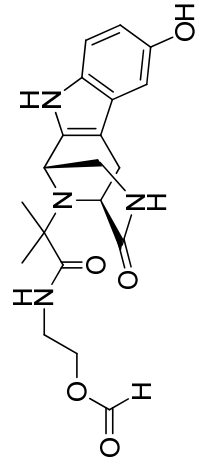

Chemical Formula: C<sub>20</sub>H<sub>24</sub>N<sub>4</sub>O<sub>5</sub>  
Molecular Weight: 400.43



Compound-33

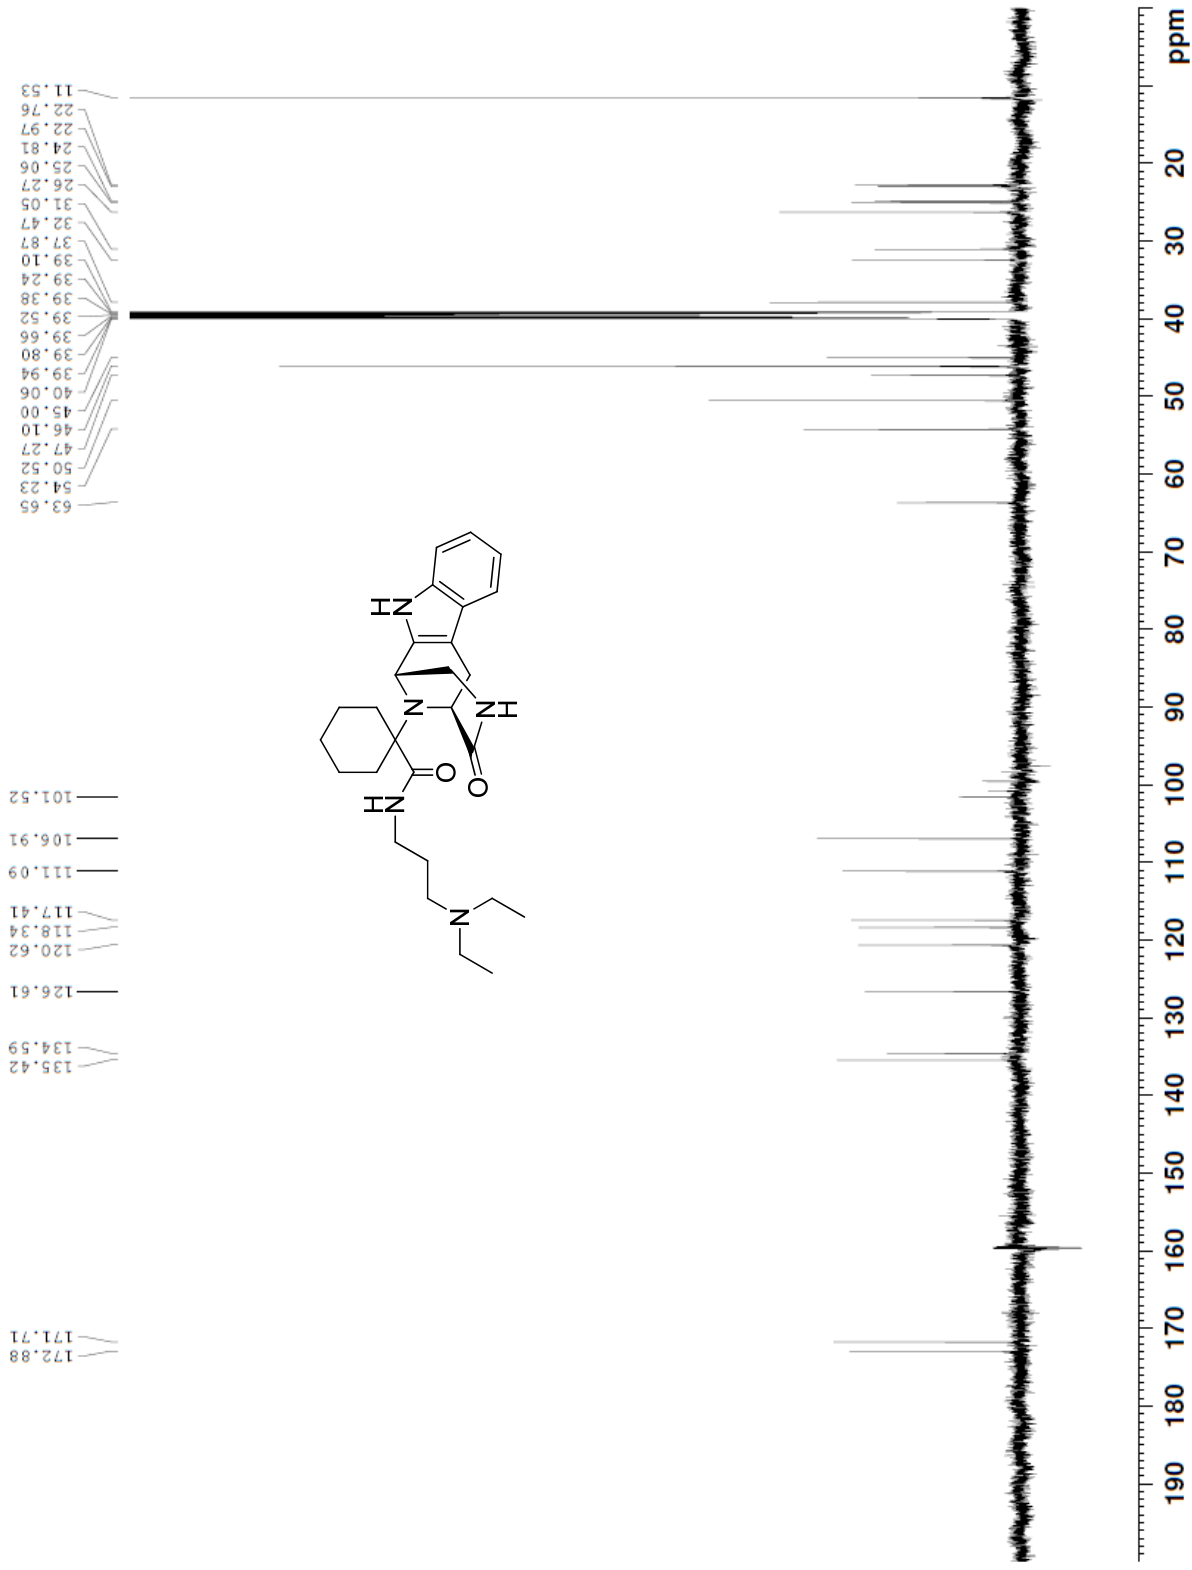

# Compound-33

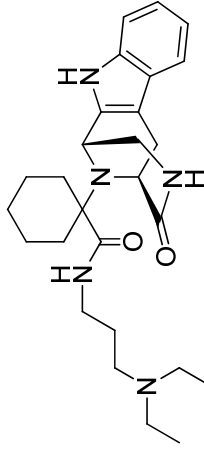

Chemical Formula:  $C_{27}H_{39}N_5O_2$   
Molecular Weight: 465.63

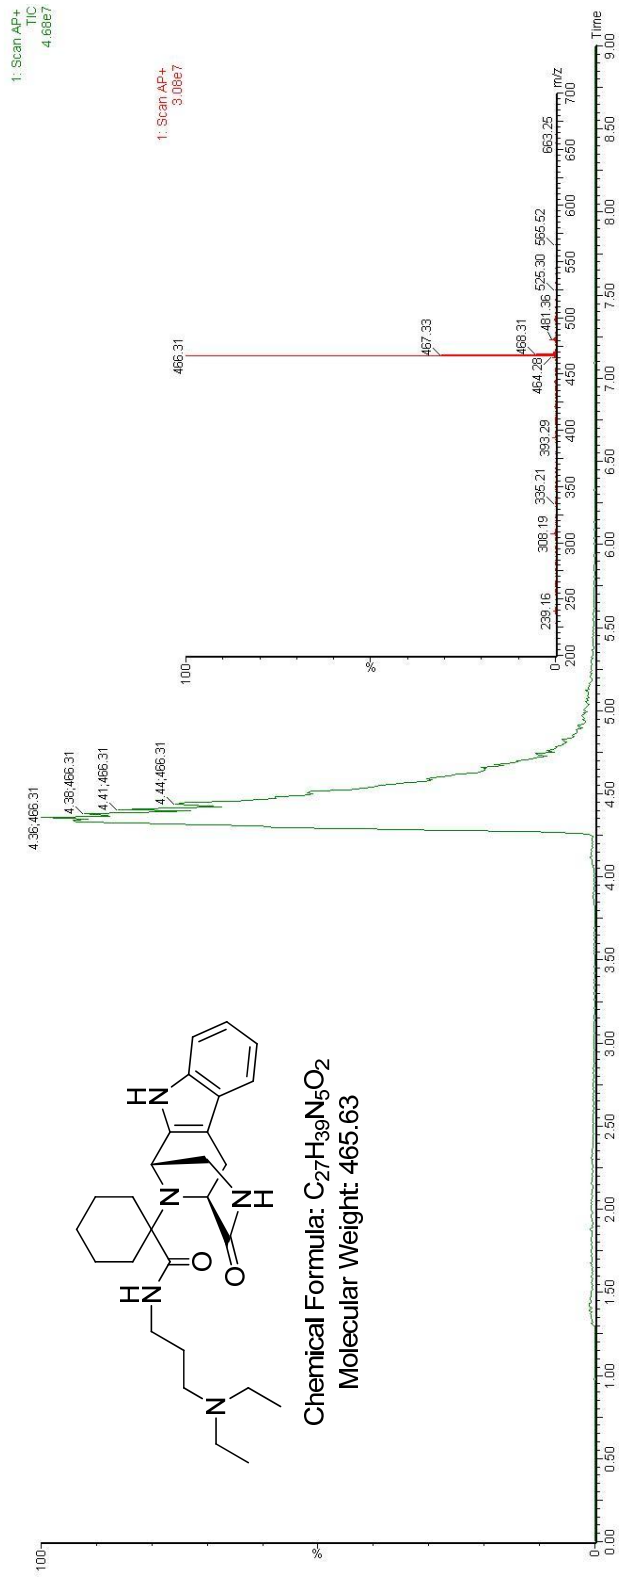

Compound-34

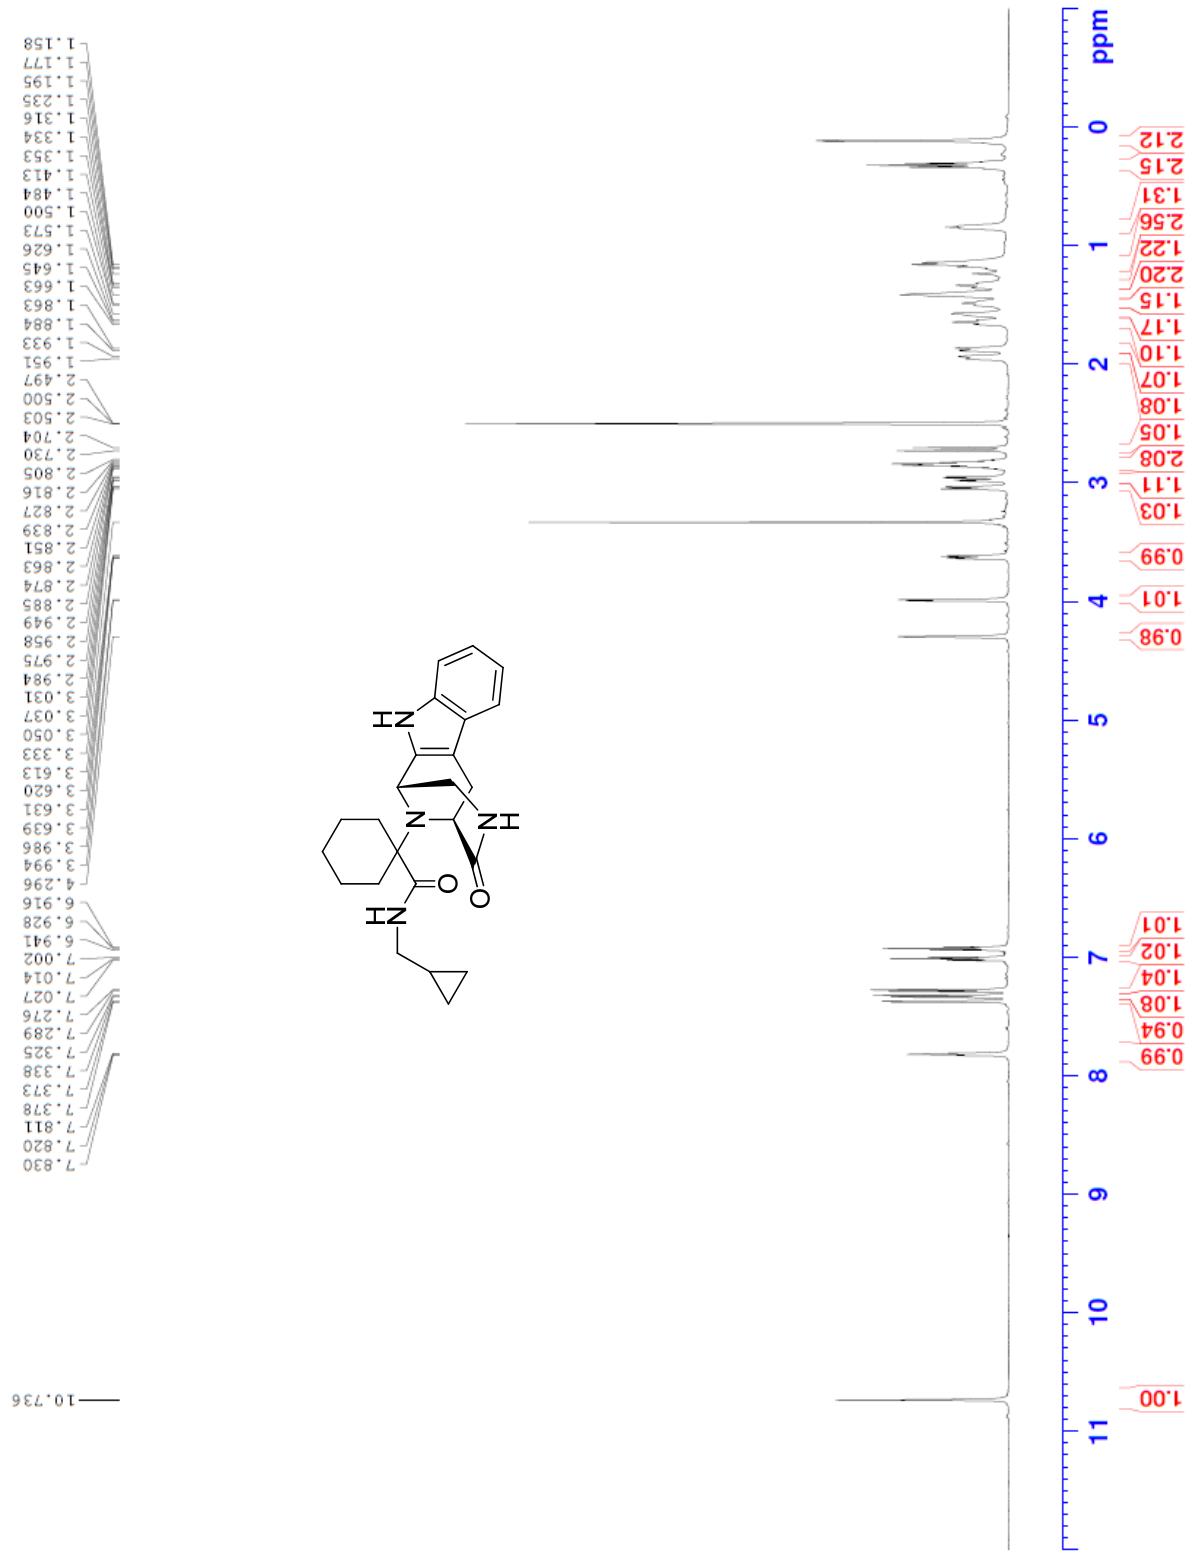



Compound-34

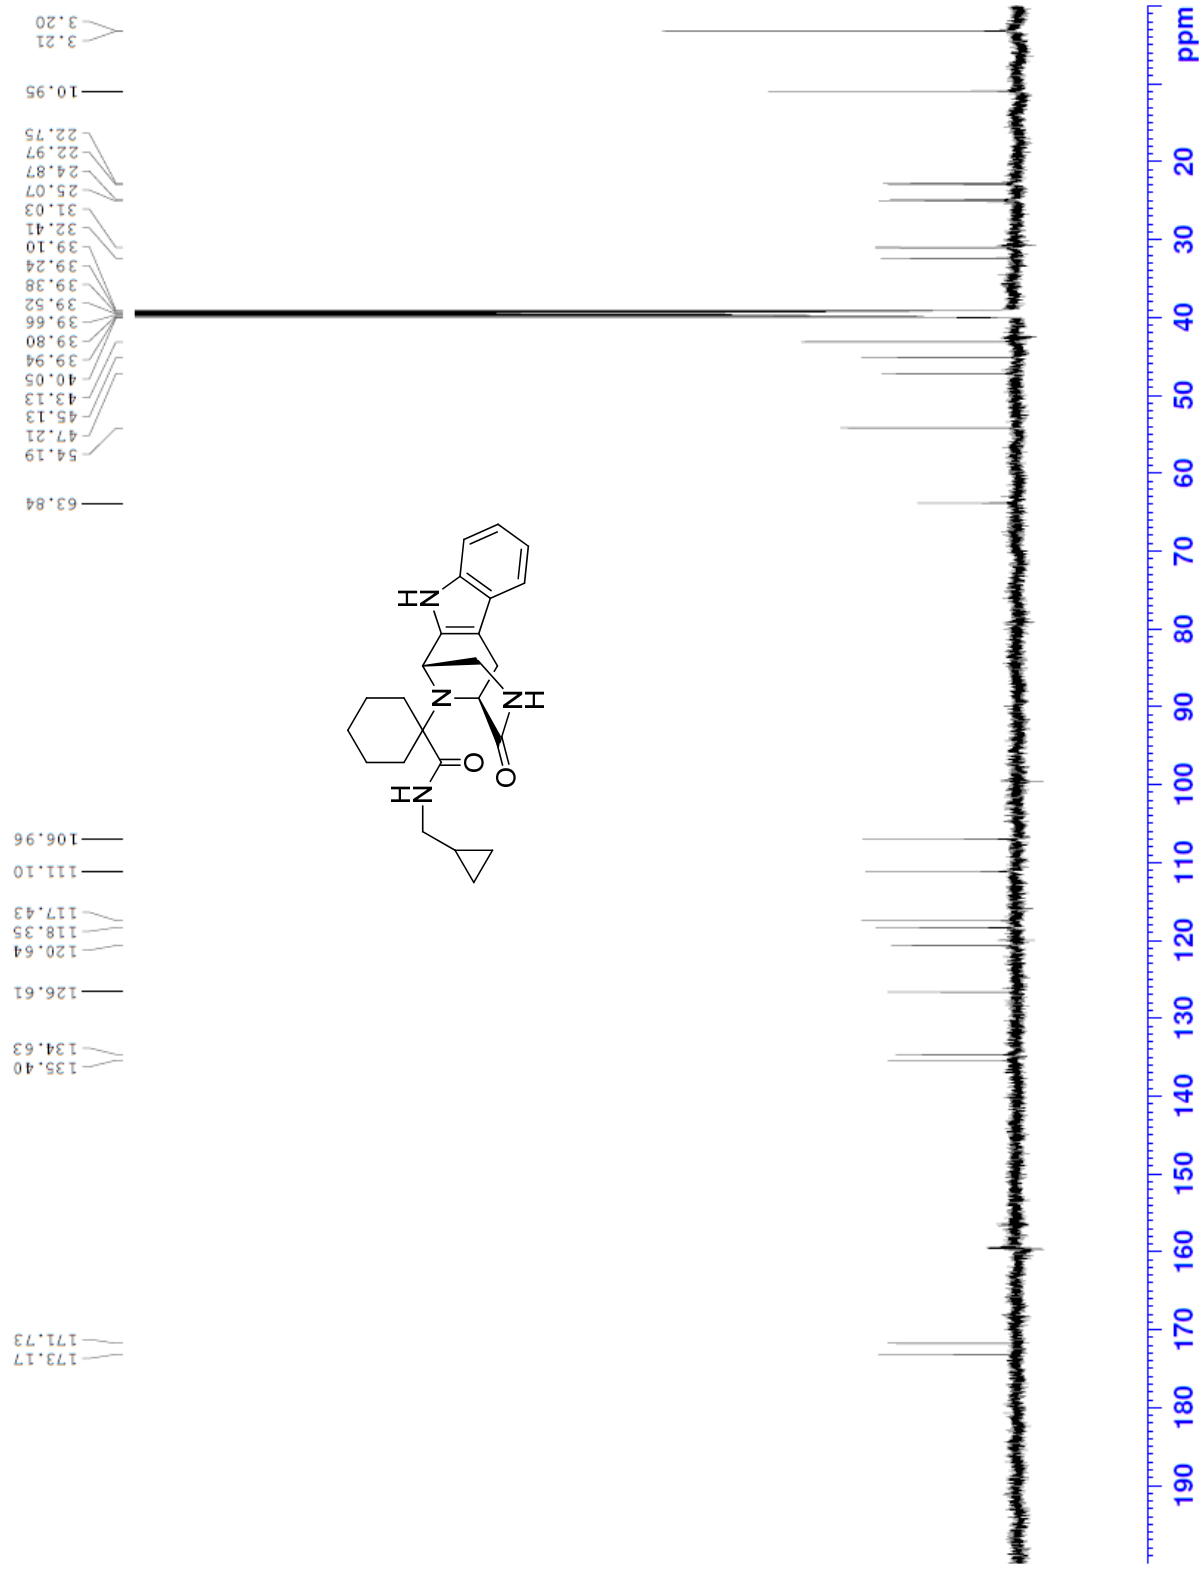

# Compound-34

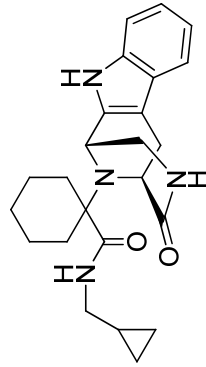

Chemical Formula:  $C_{24}H_{30}N_4O_2$   
Molecular Weight: 406.52

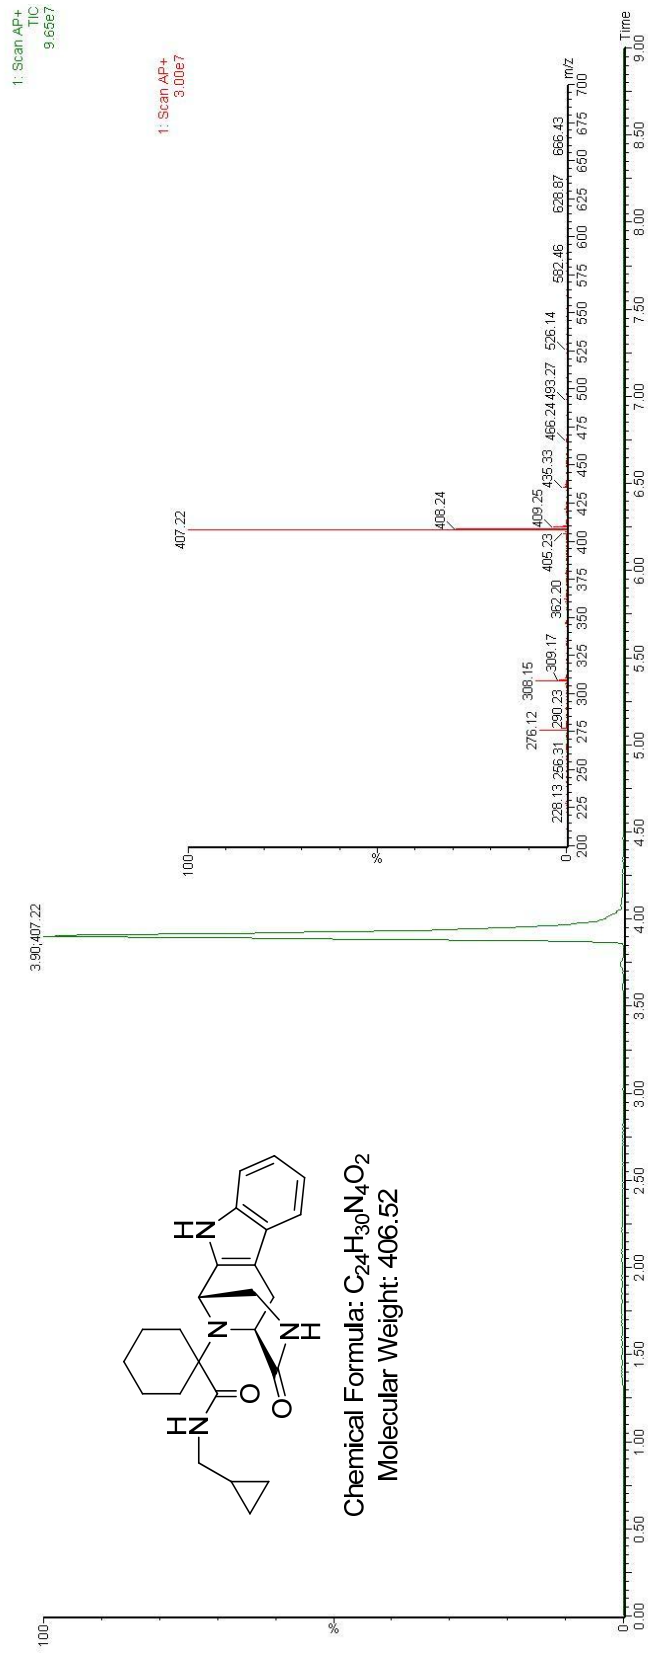

Compound-35

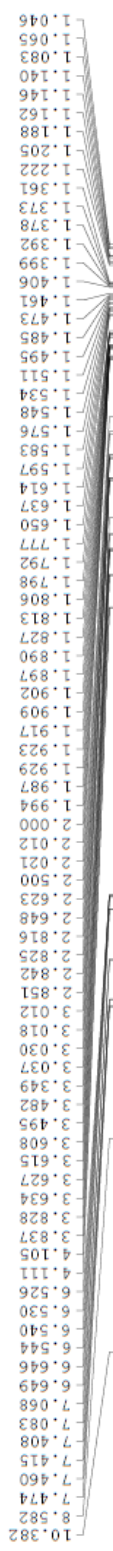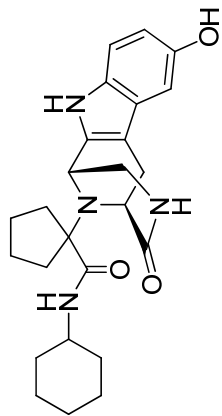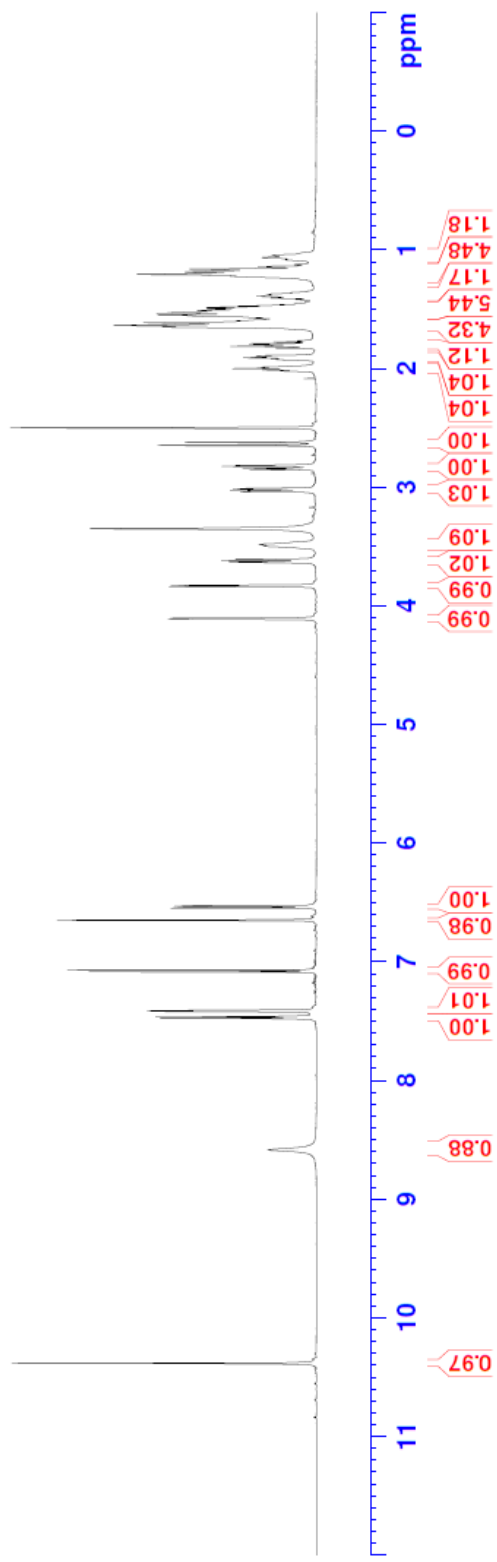

Compound-35

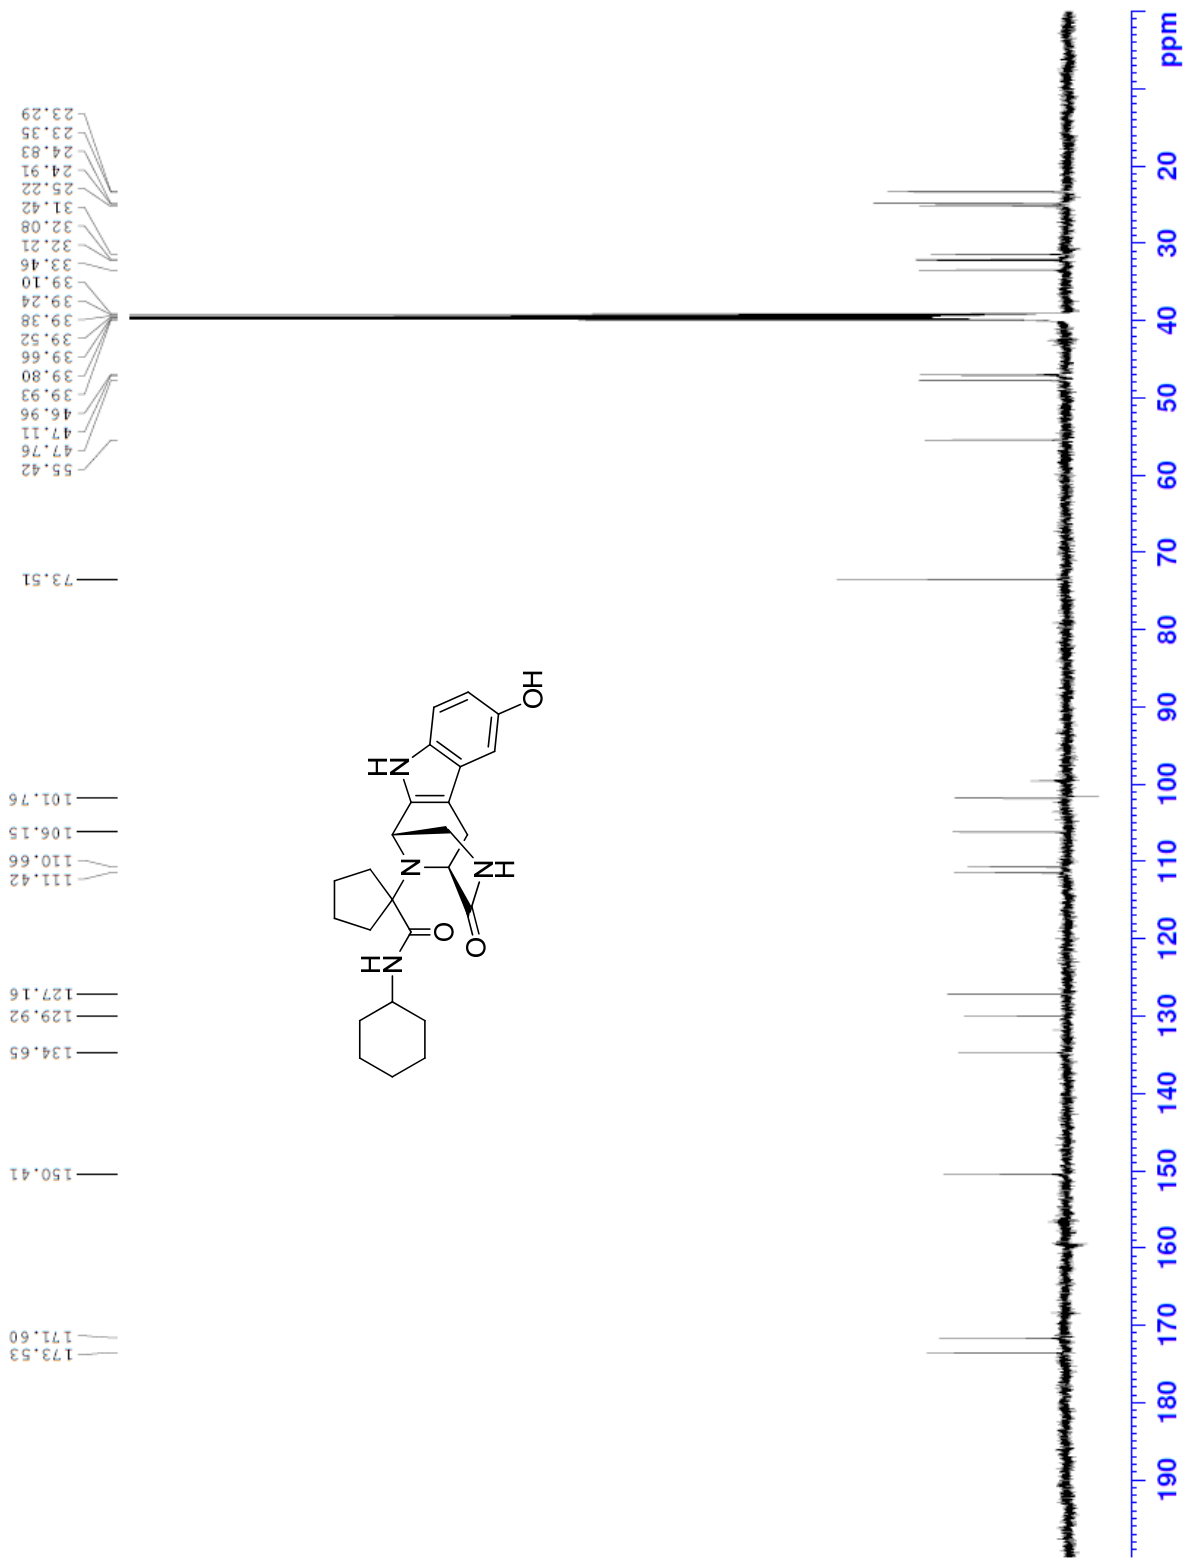

# Compound-35

1: Scan AP+  
TIC  
5.63e7

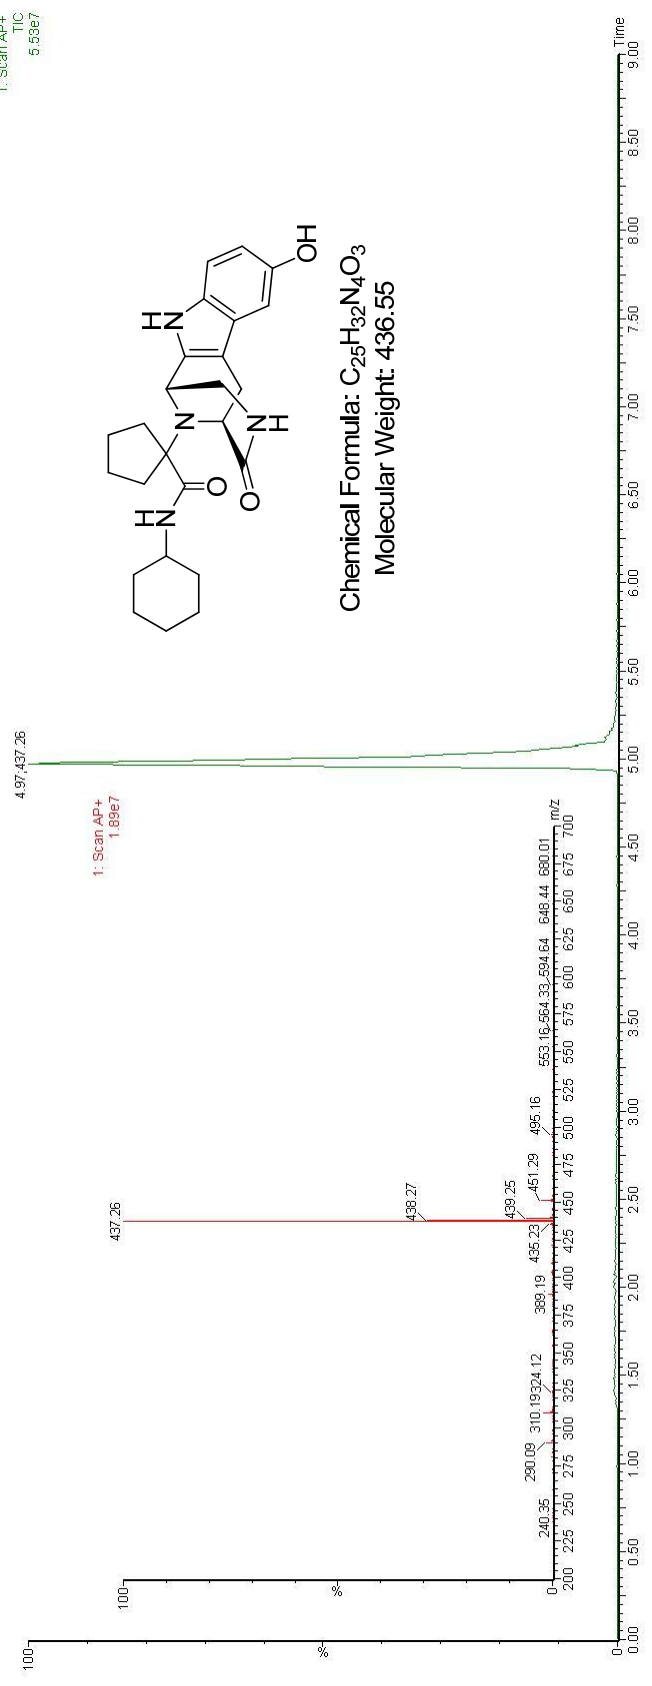

1: Scan AP+  
1.89e7

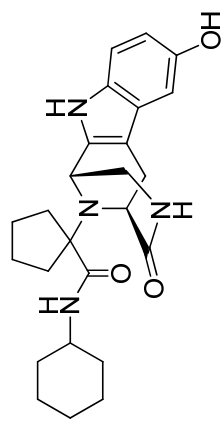

Chemical Formula:  $C_{25}H_{32}N_4O_3$   
Molecular Weight: 436.55

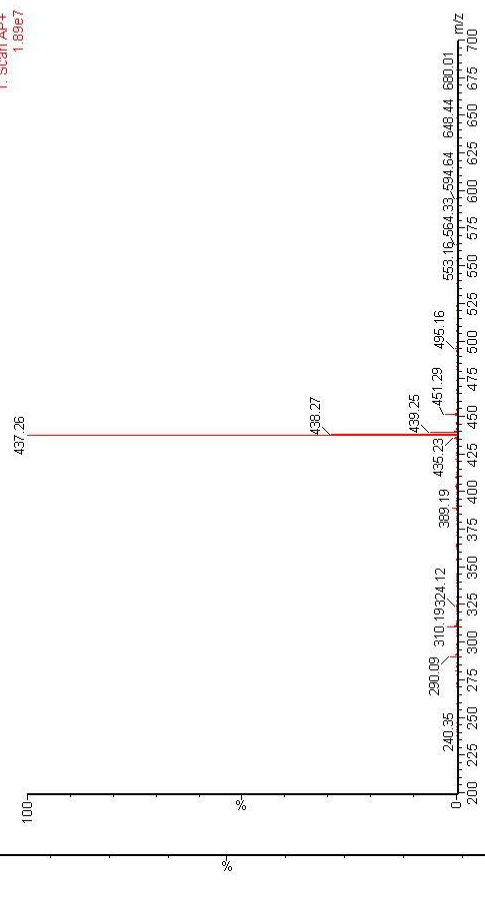

Compound-36, 1<sup>st</sup> diastereomer

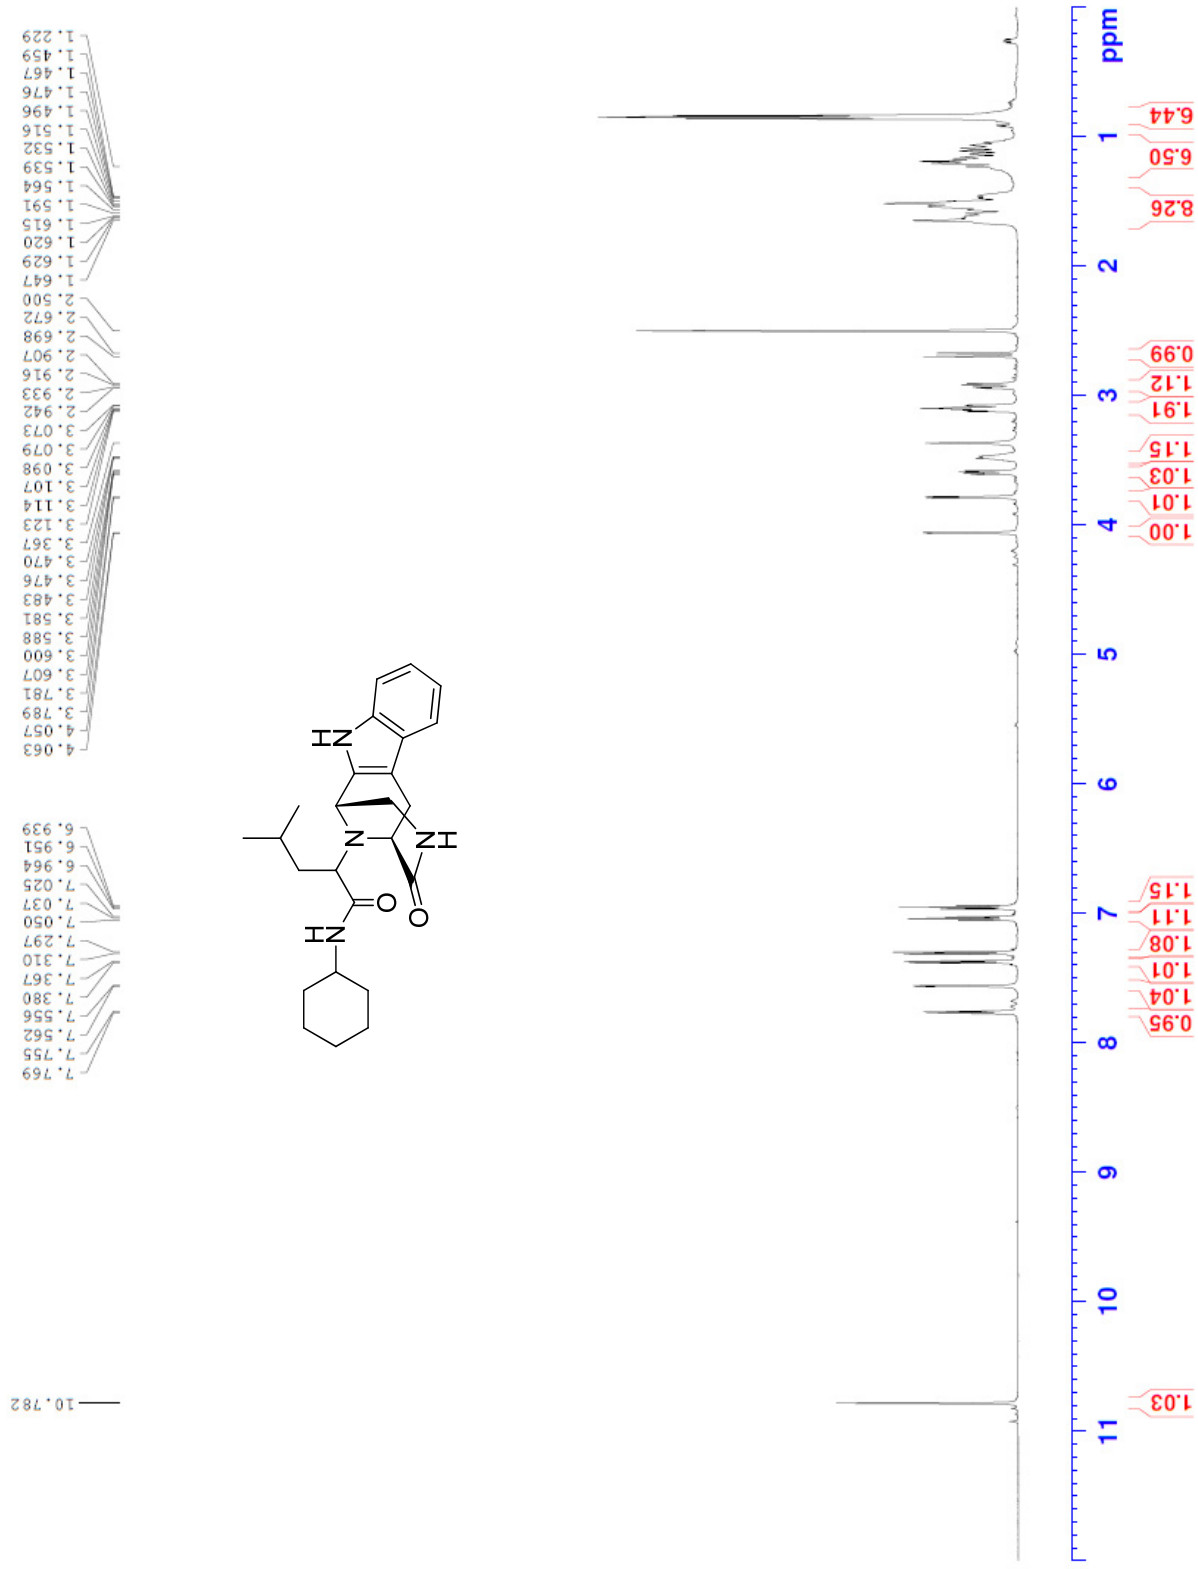

Compound-36, 1<sup>st</sup> diastereomer

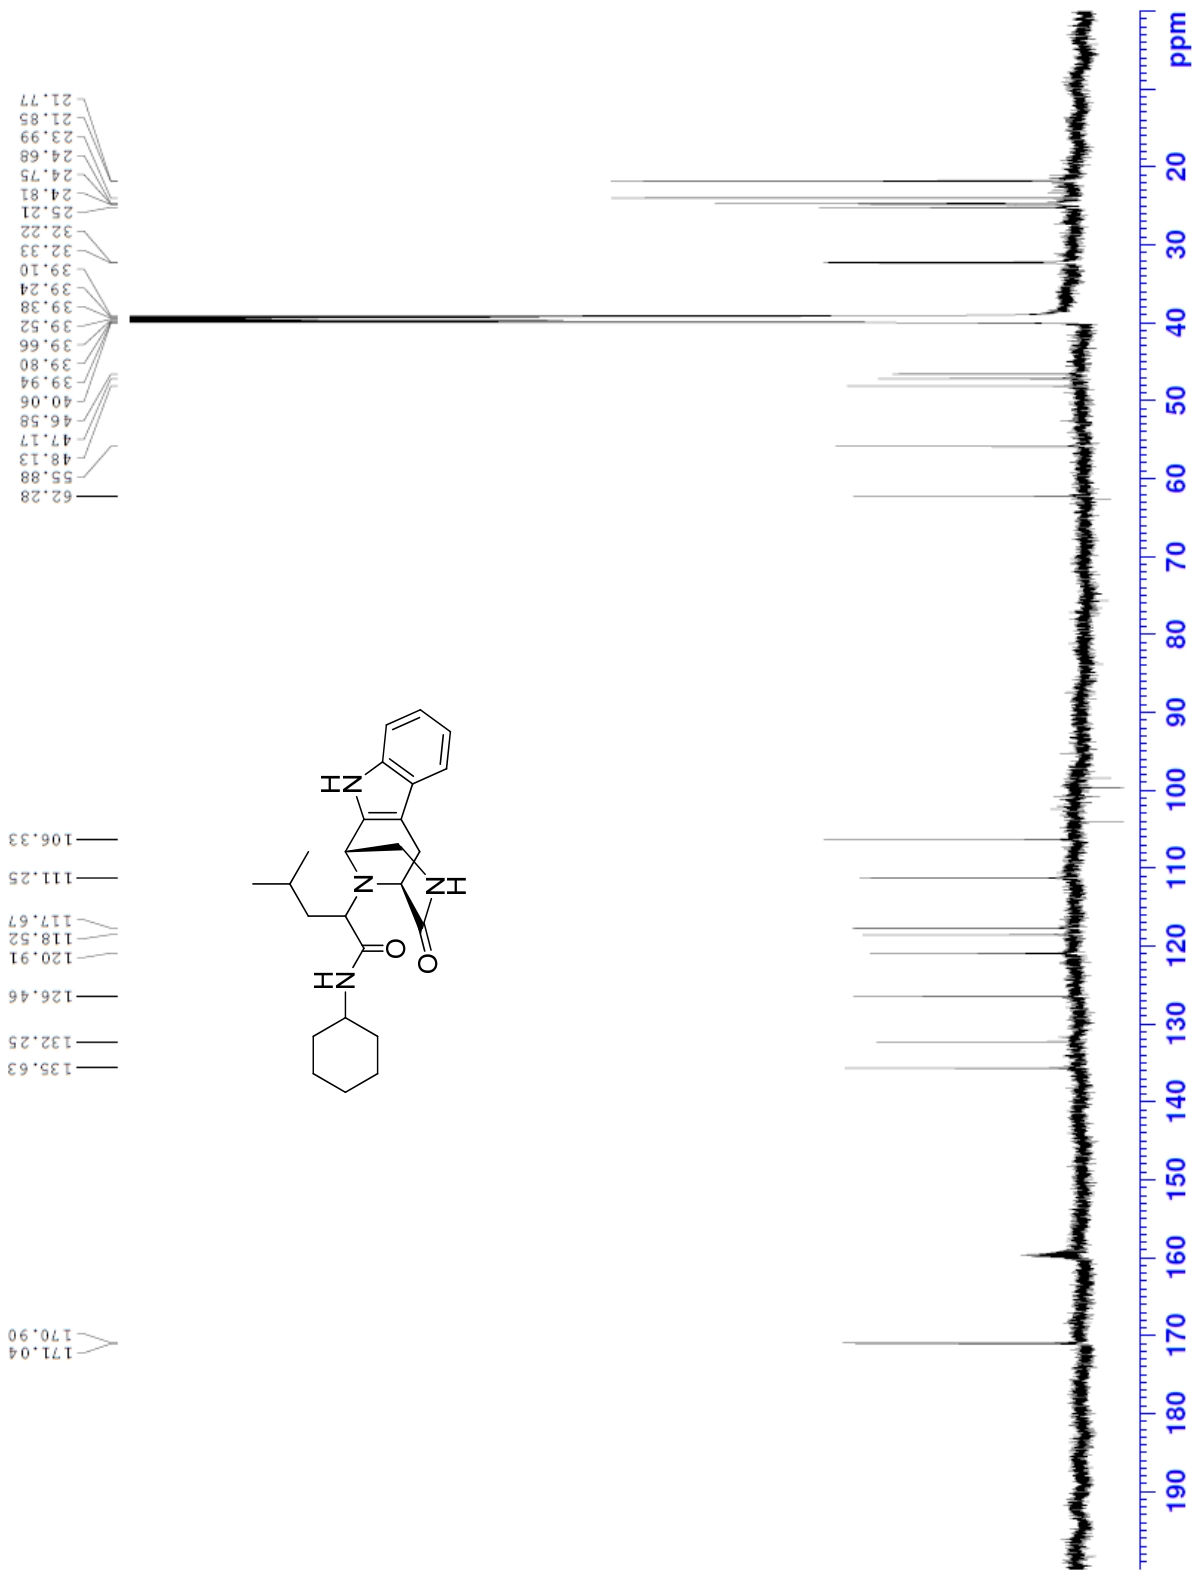

Compound-36, 2<sup>nd</sup> diastereomer

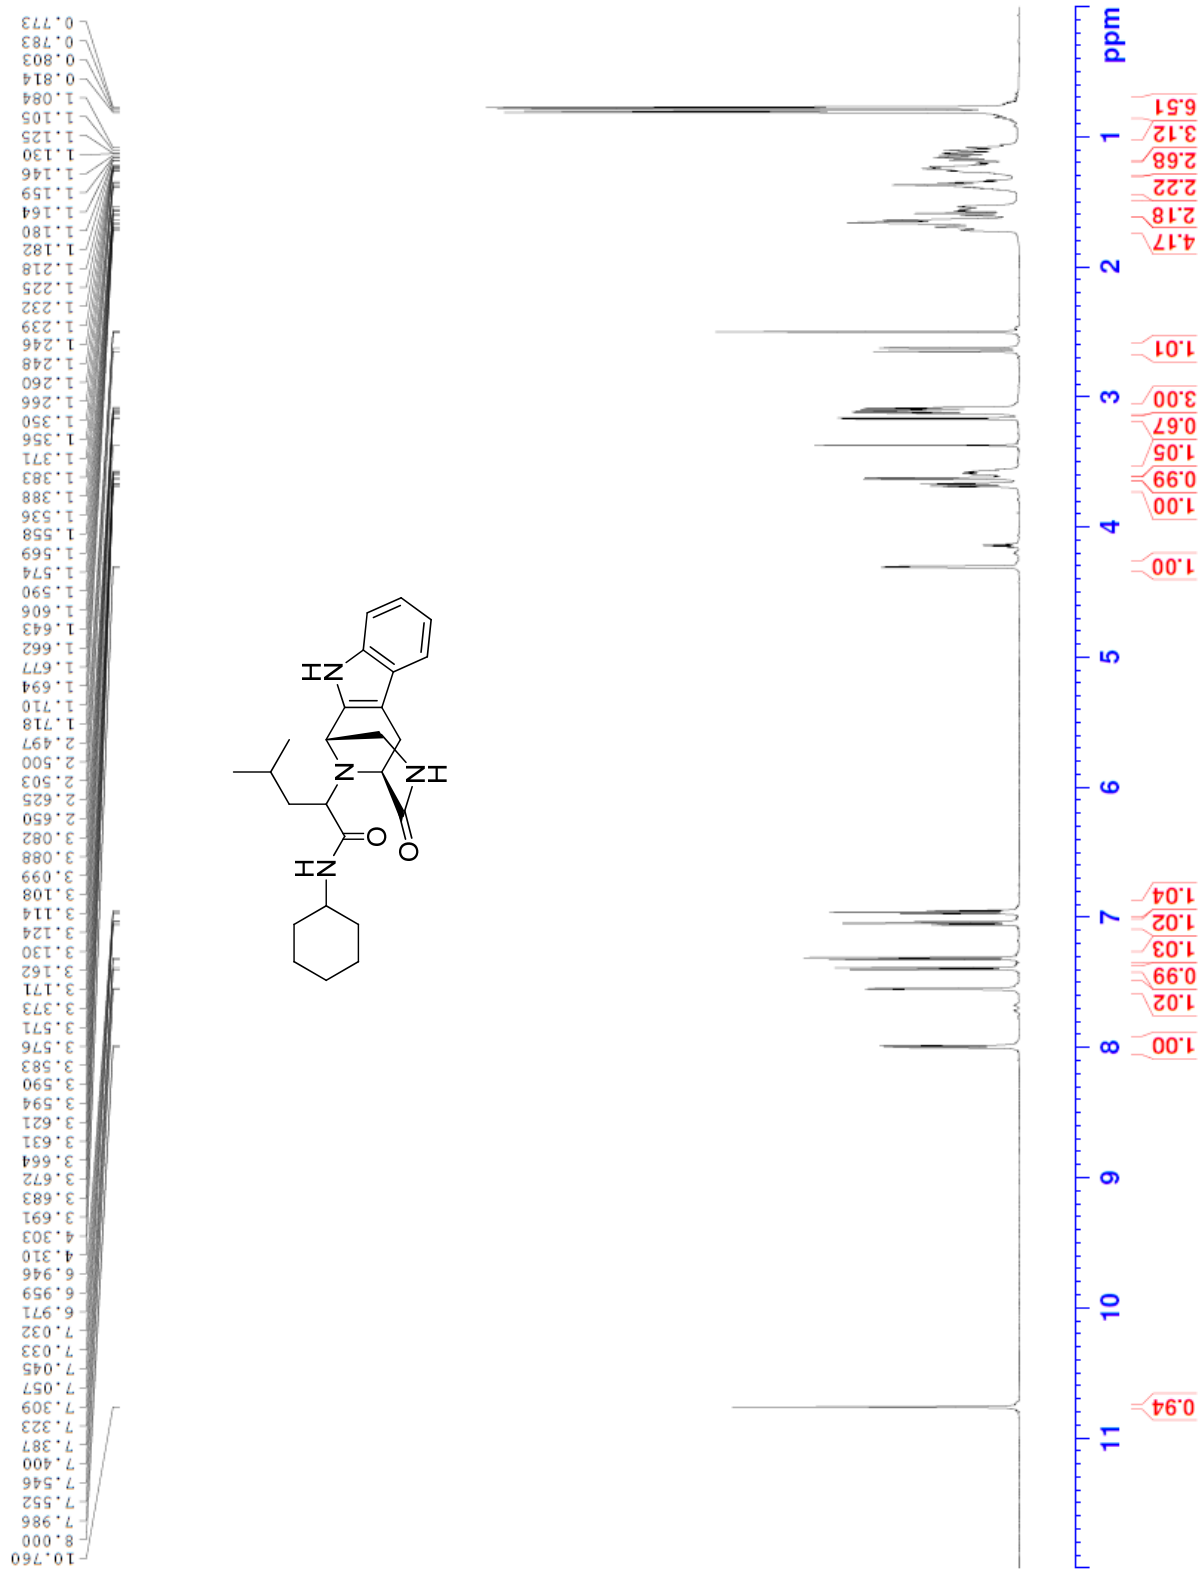



Compound-36, 2<sup>nd</sup> diastereomer

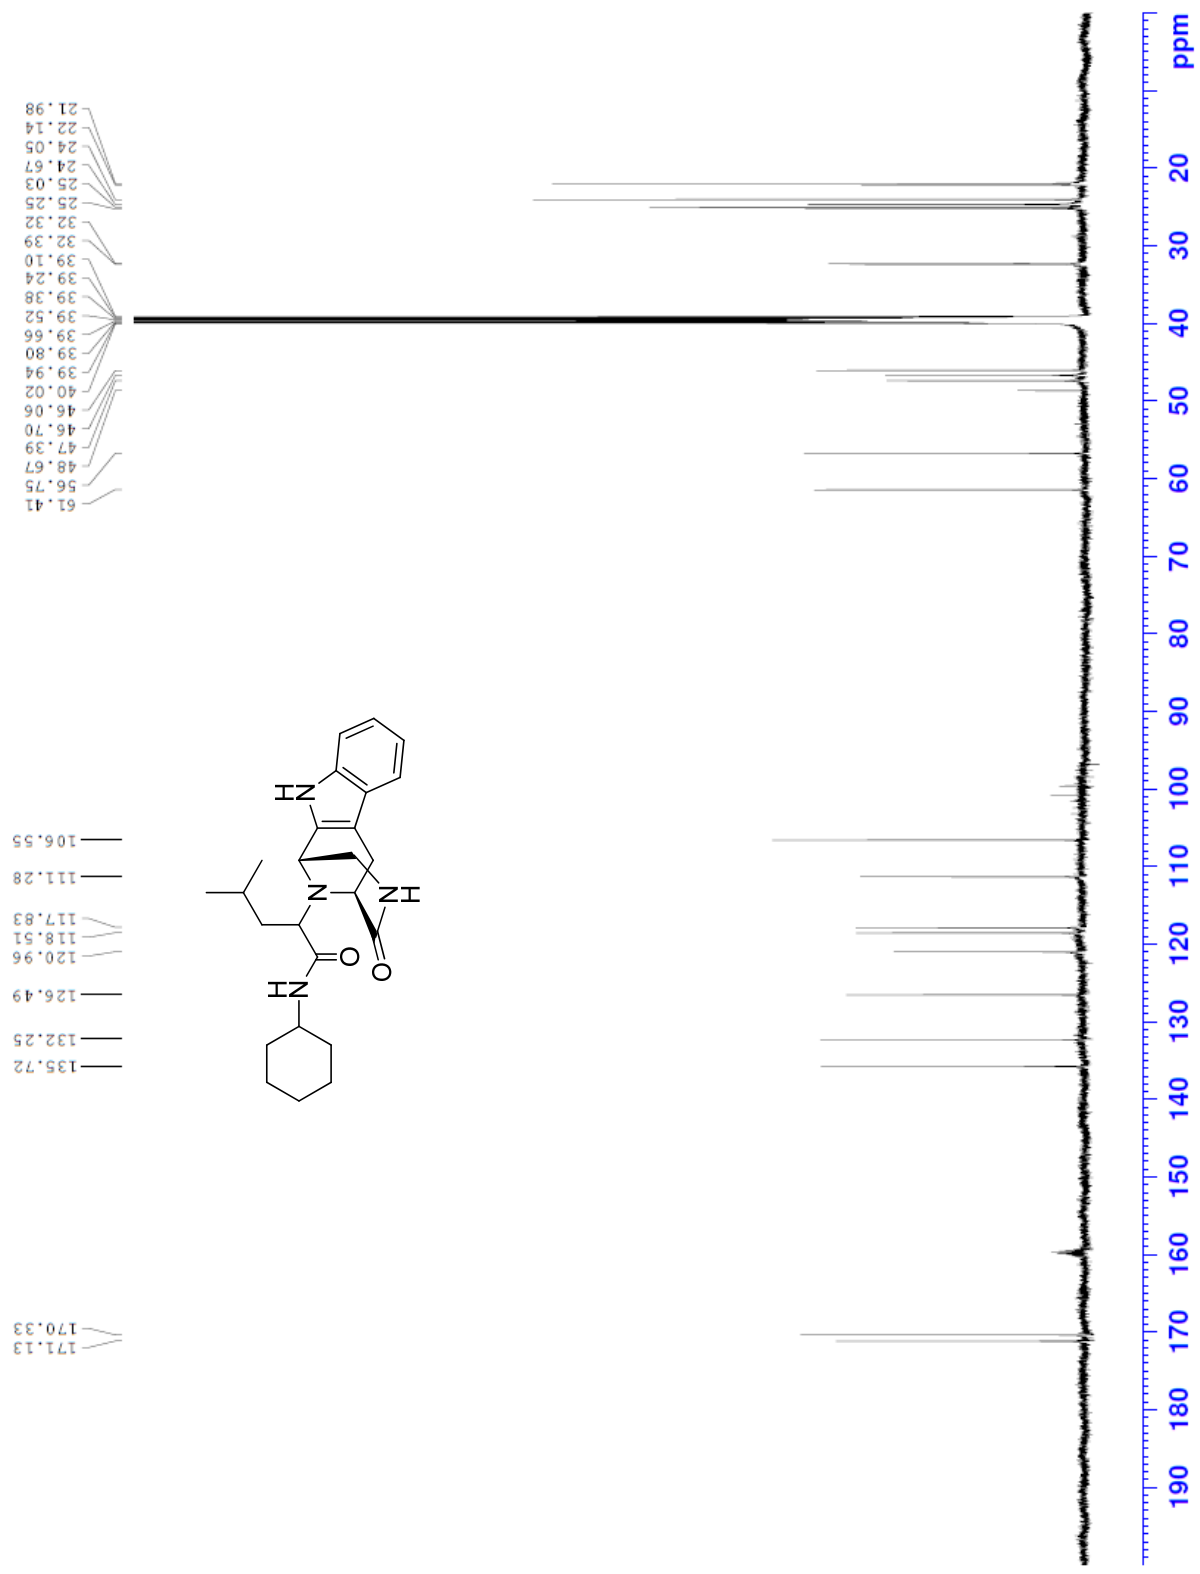

1: Scan AP+  
TIC  
9.18E7

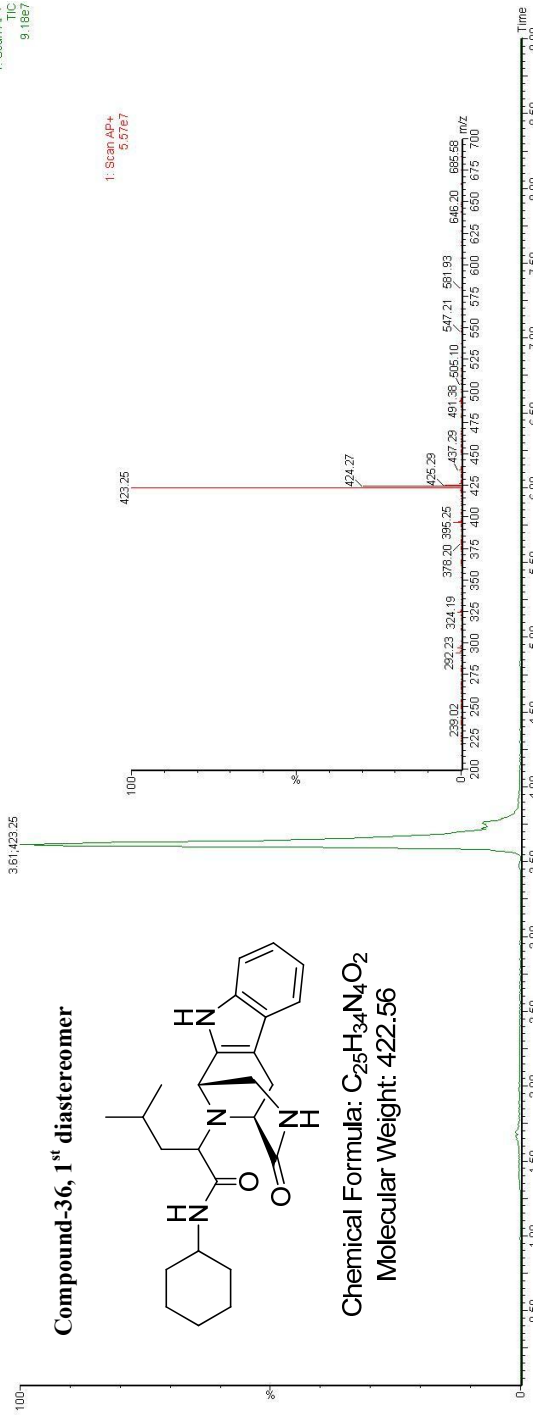

**Compound-36, 1<sup>st</sup> diastereomer**

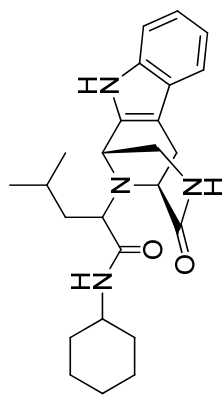

Chemical Formula: C<sub>25</sub>H<sub>34</sub>N<sub>4</sub>O<sub>2</sub>  
Molecular Weight: 422.56

1: Scan AP+  
TIC  
1.39e8

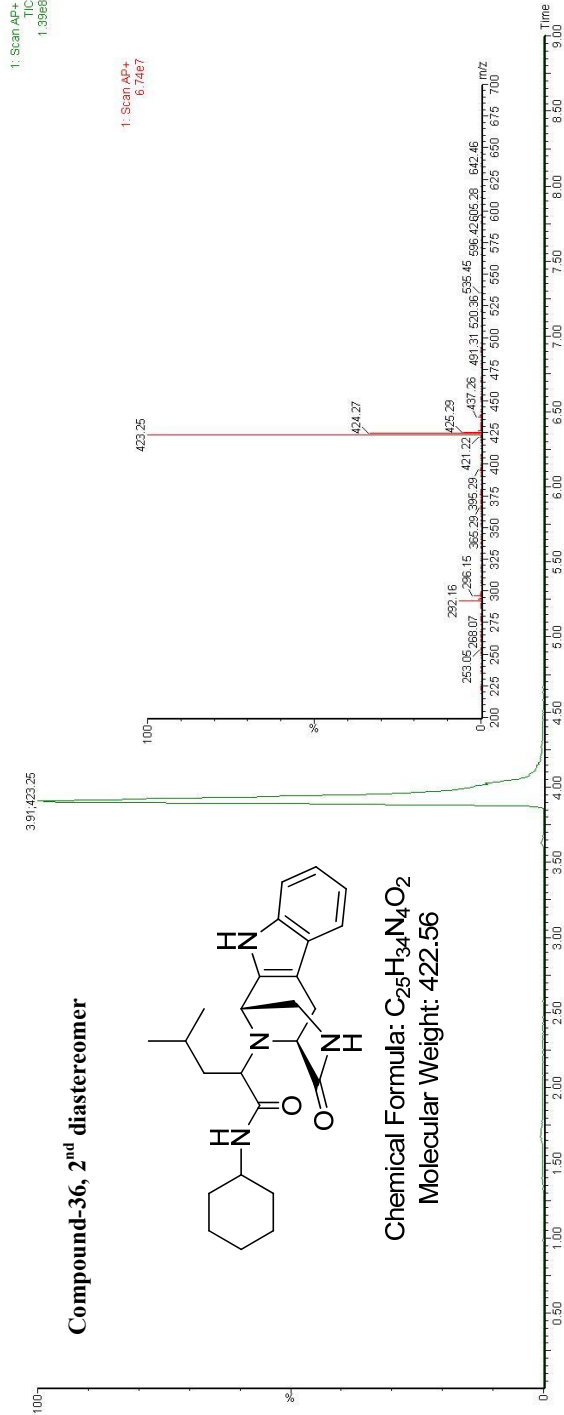

**Compound-36, 2<sup>nd</sup> diastereomer**

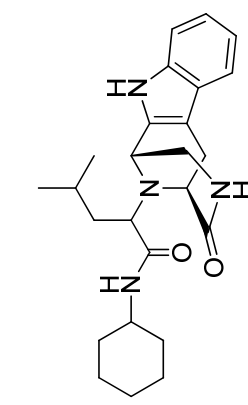

Chemical Formula: C<sub>25</sub>H<sub>34</sub>N<sub>4</sub>O<sub>2</sub>  
Molecular Weight: 422.56

Compound-40

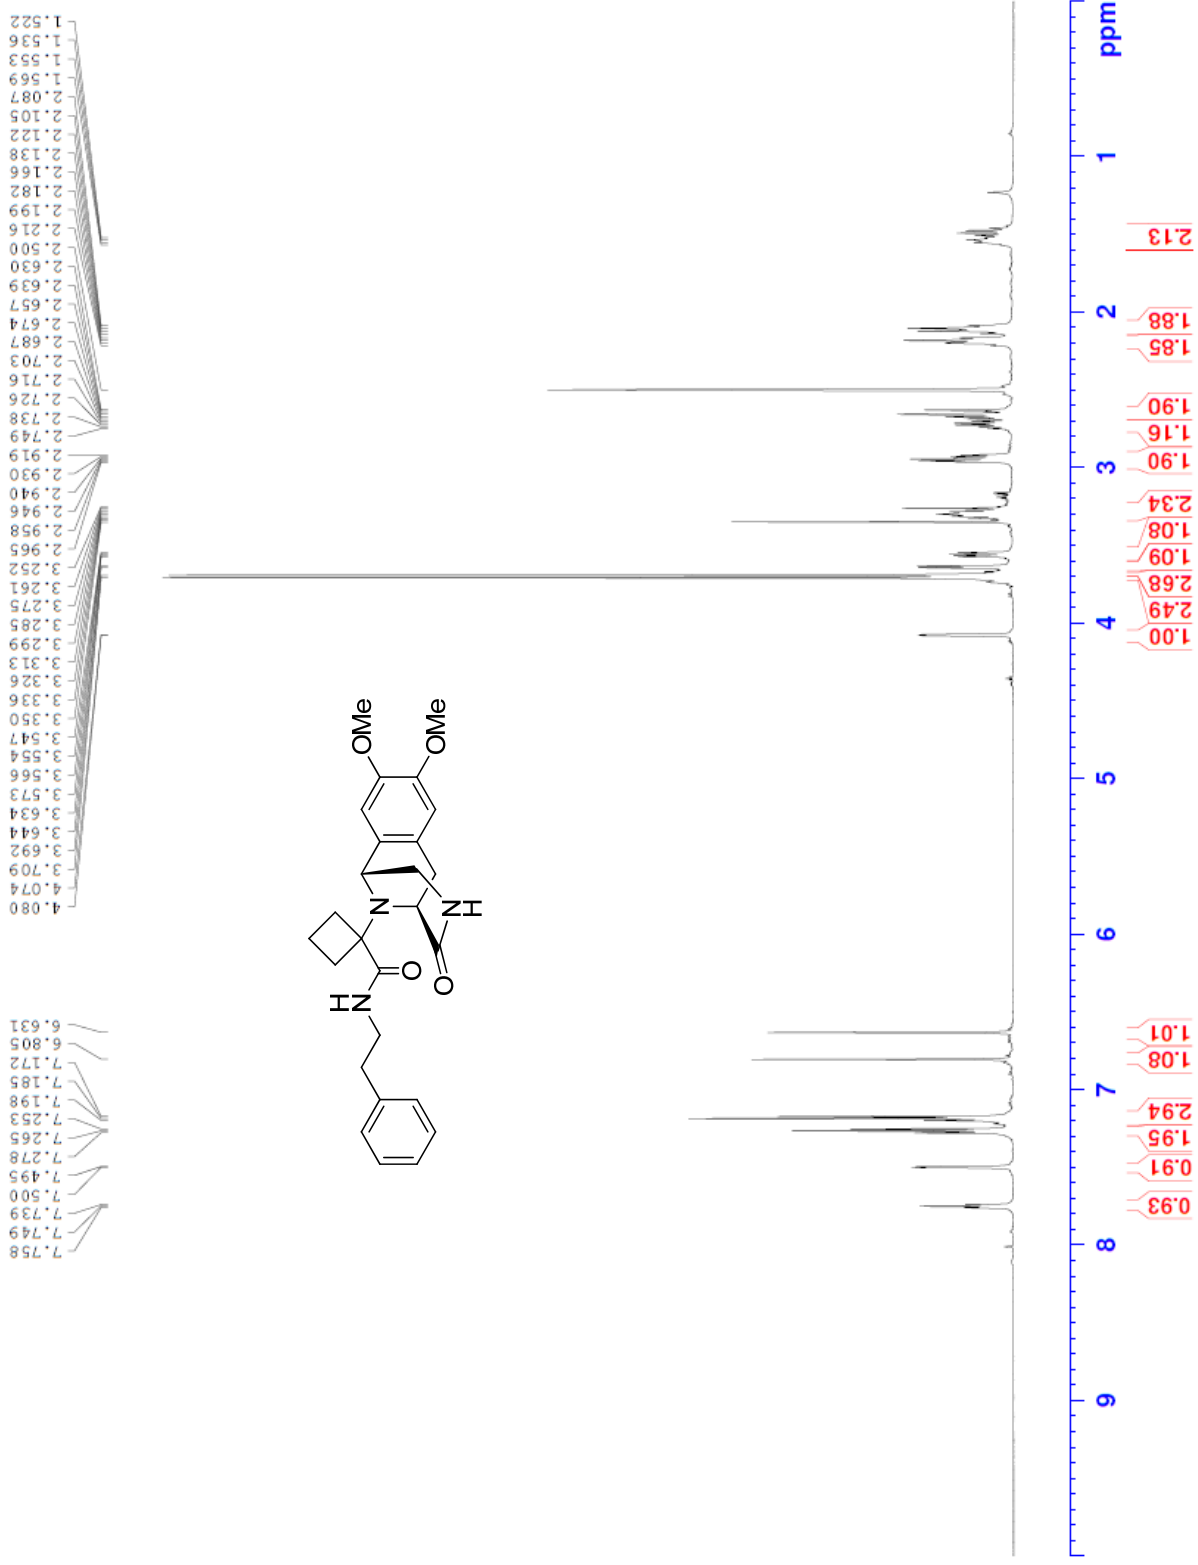

Compound-40

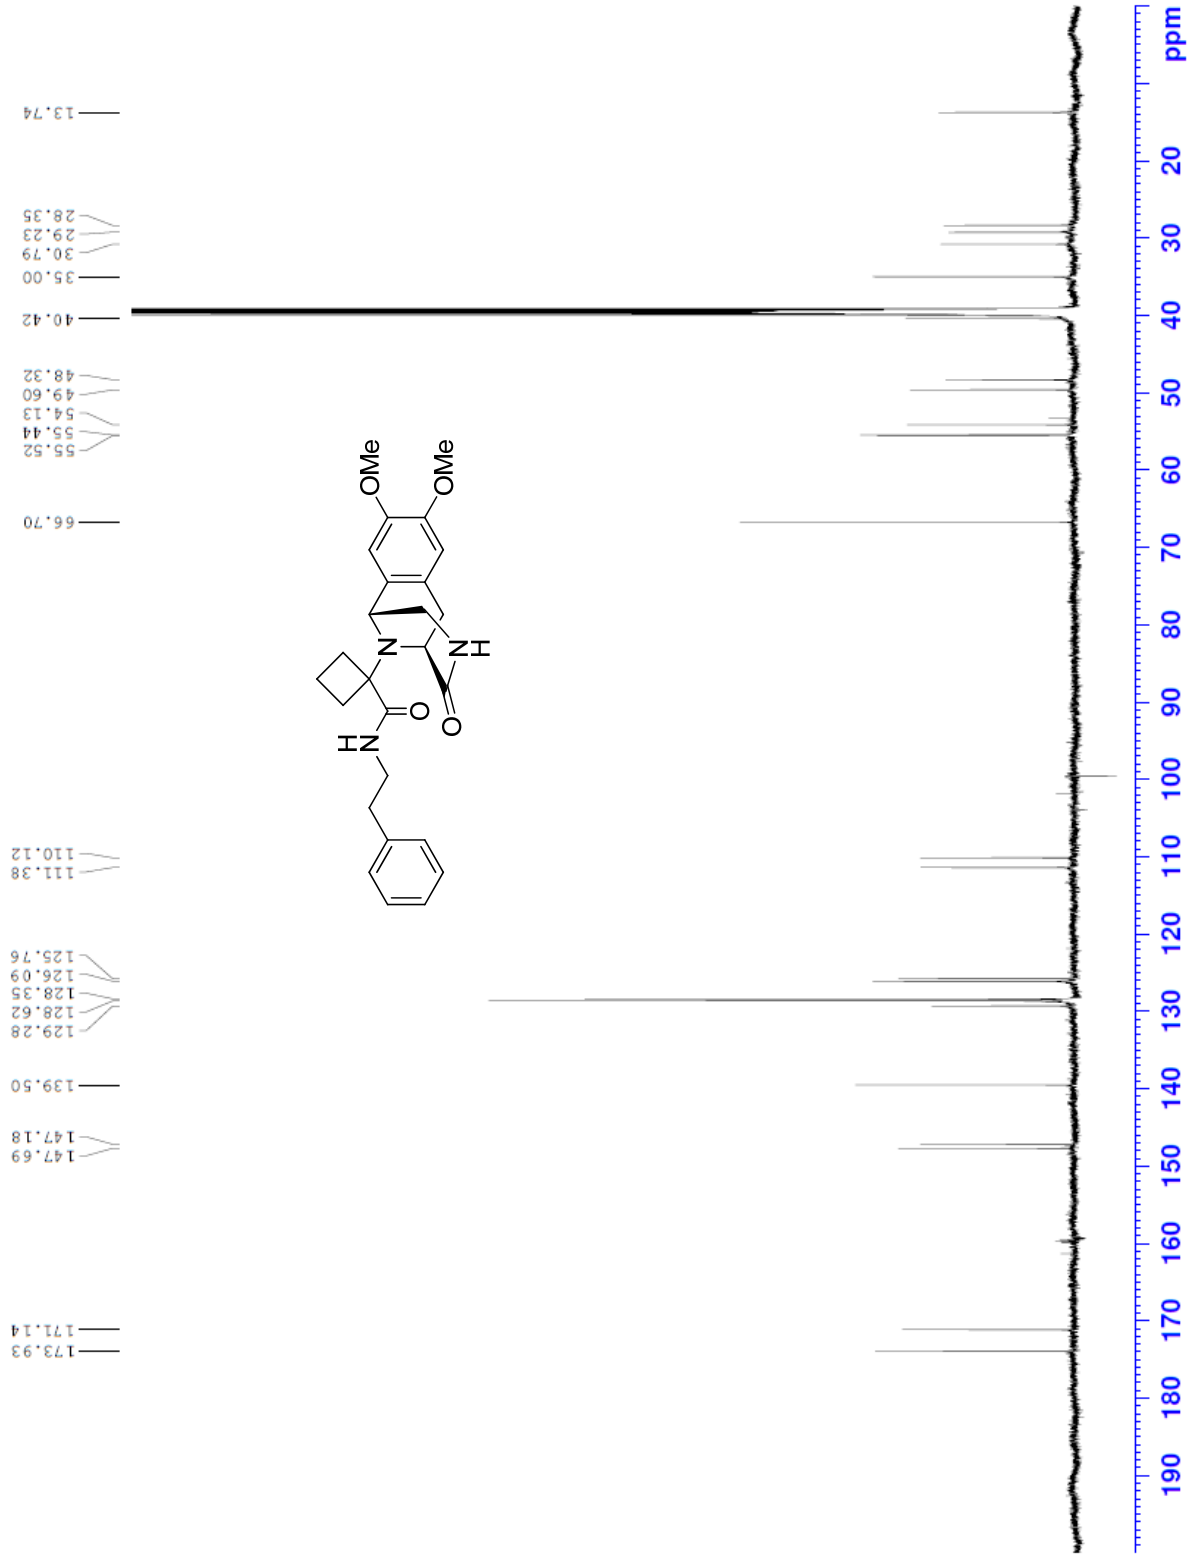

# Compound-40

1: Scan AP+  
TIC  
5.52e7

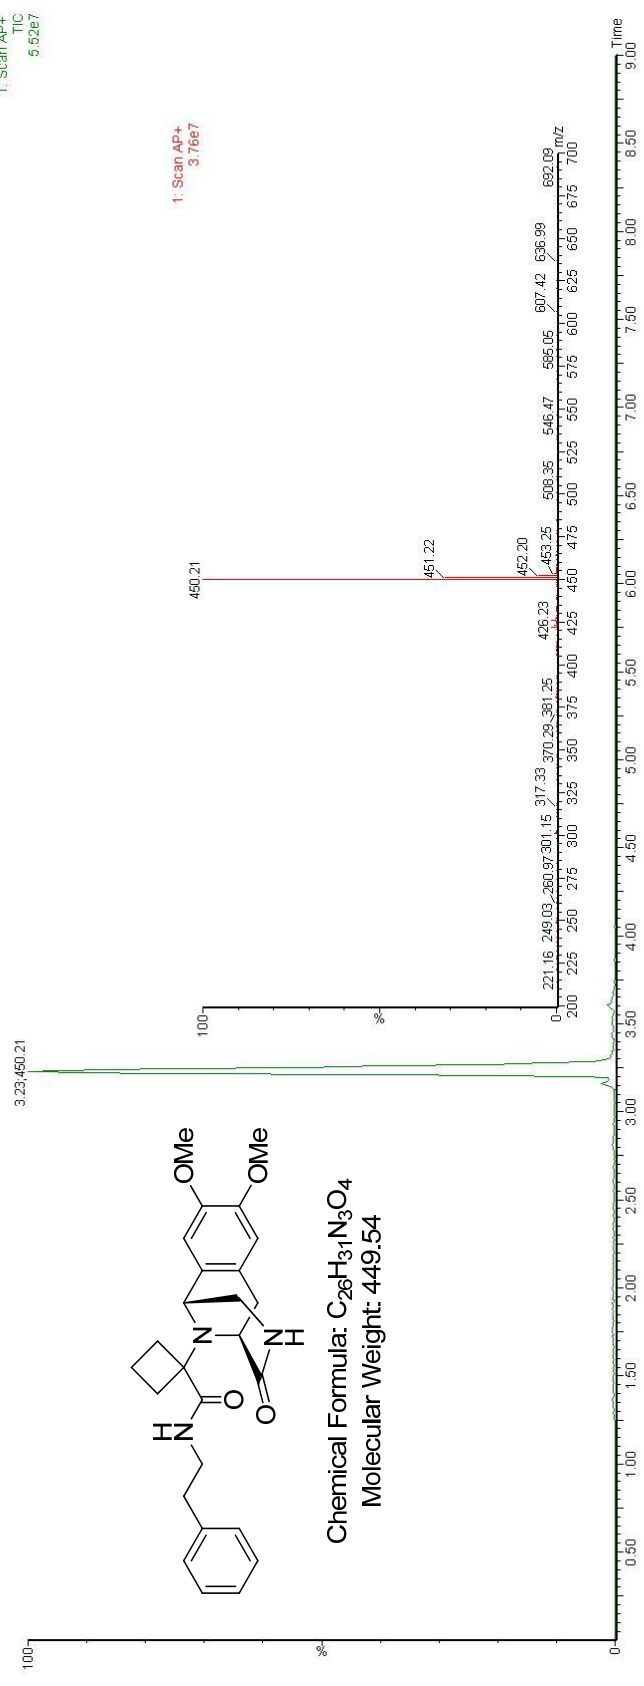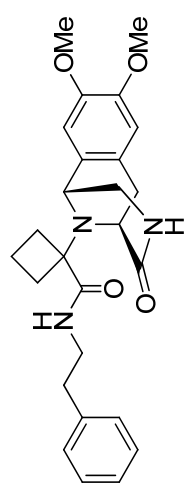

Chemical Formula:  $C_{26}H_{31}N_3O_4$   
Molecular Weight: 449.54

Compound-41

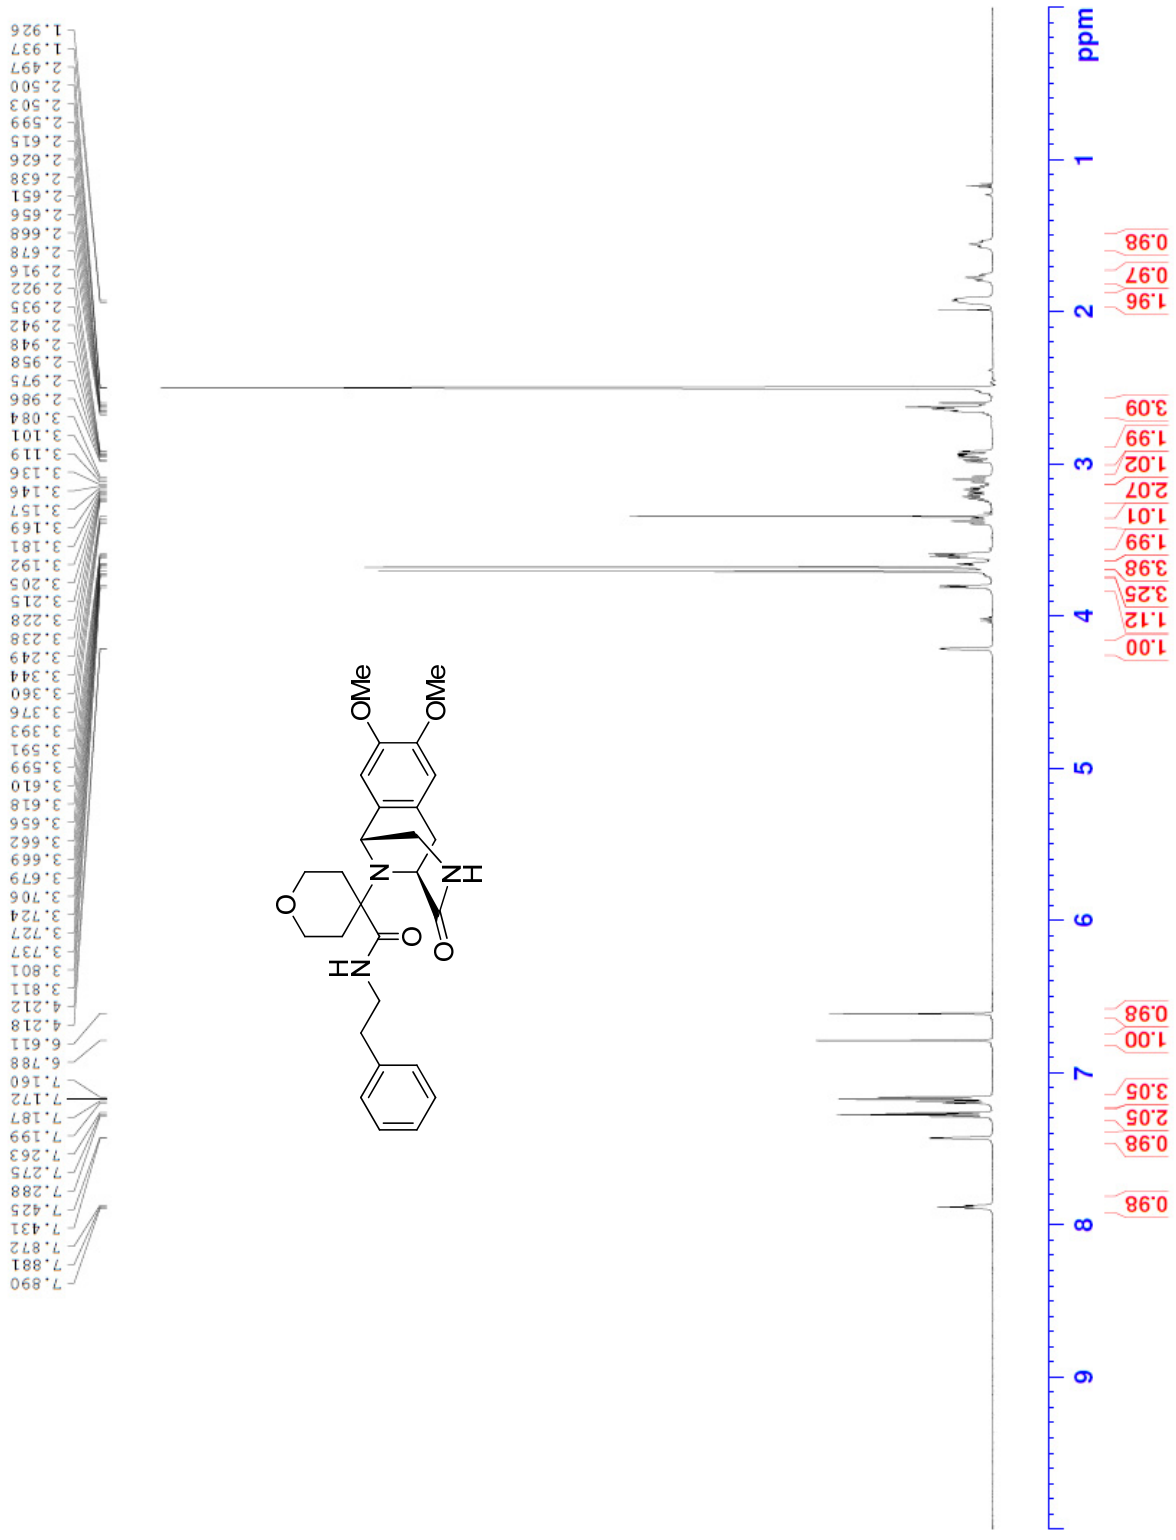

Compound-41

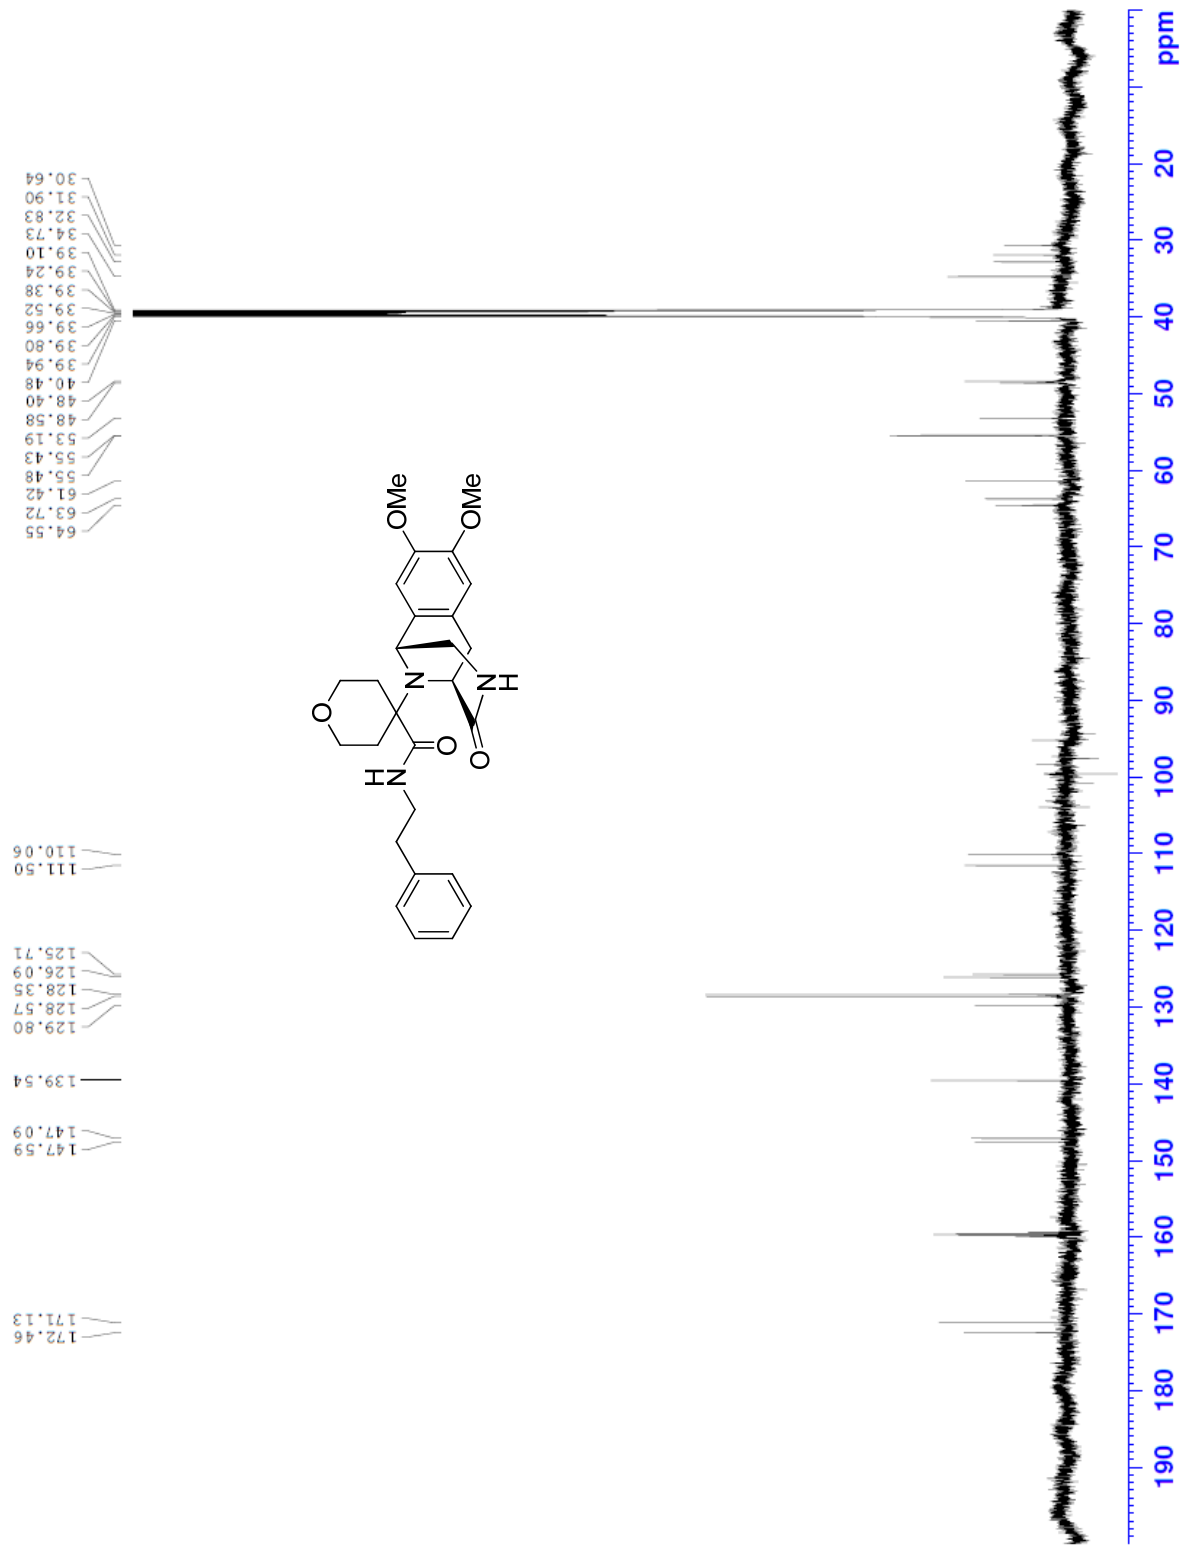

Compound-41

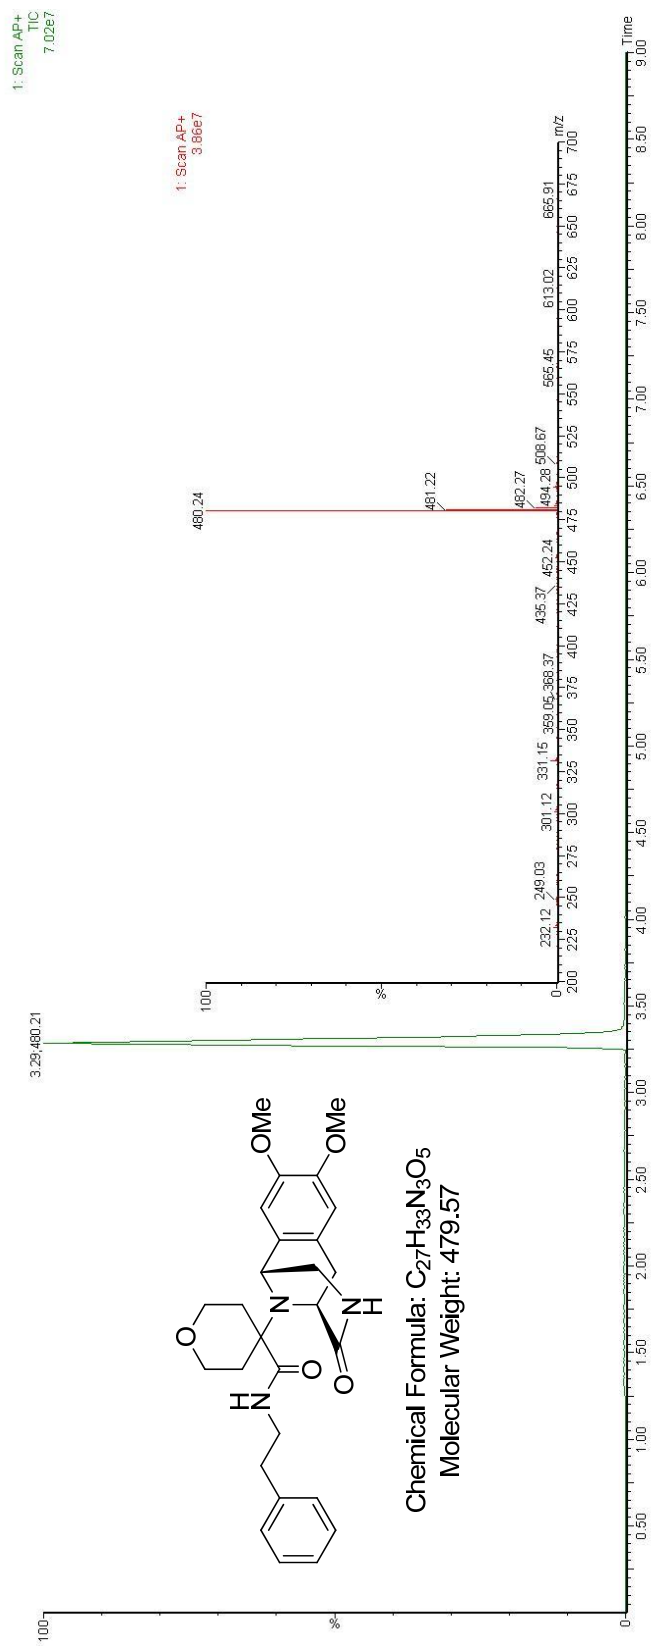



Compound-42

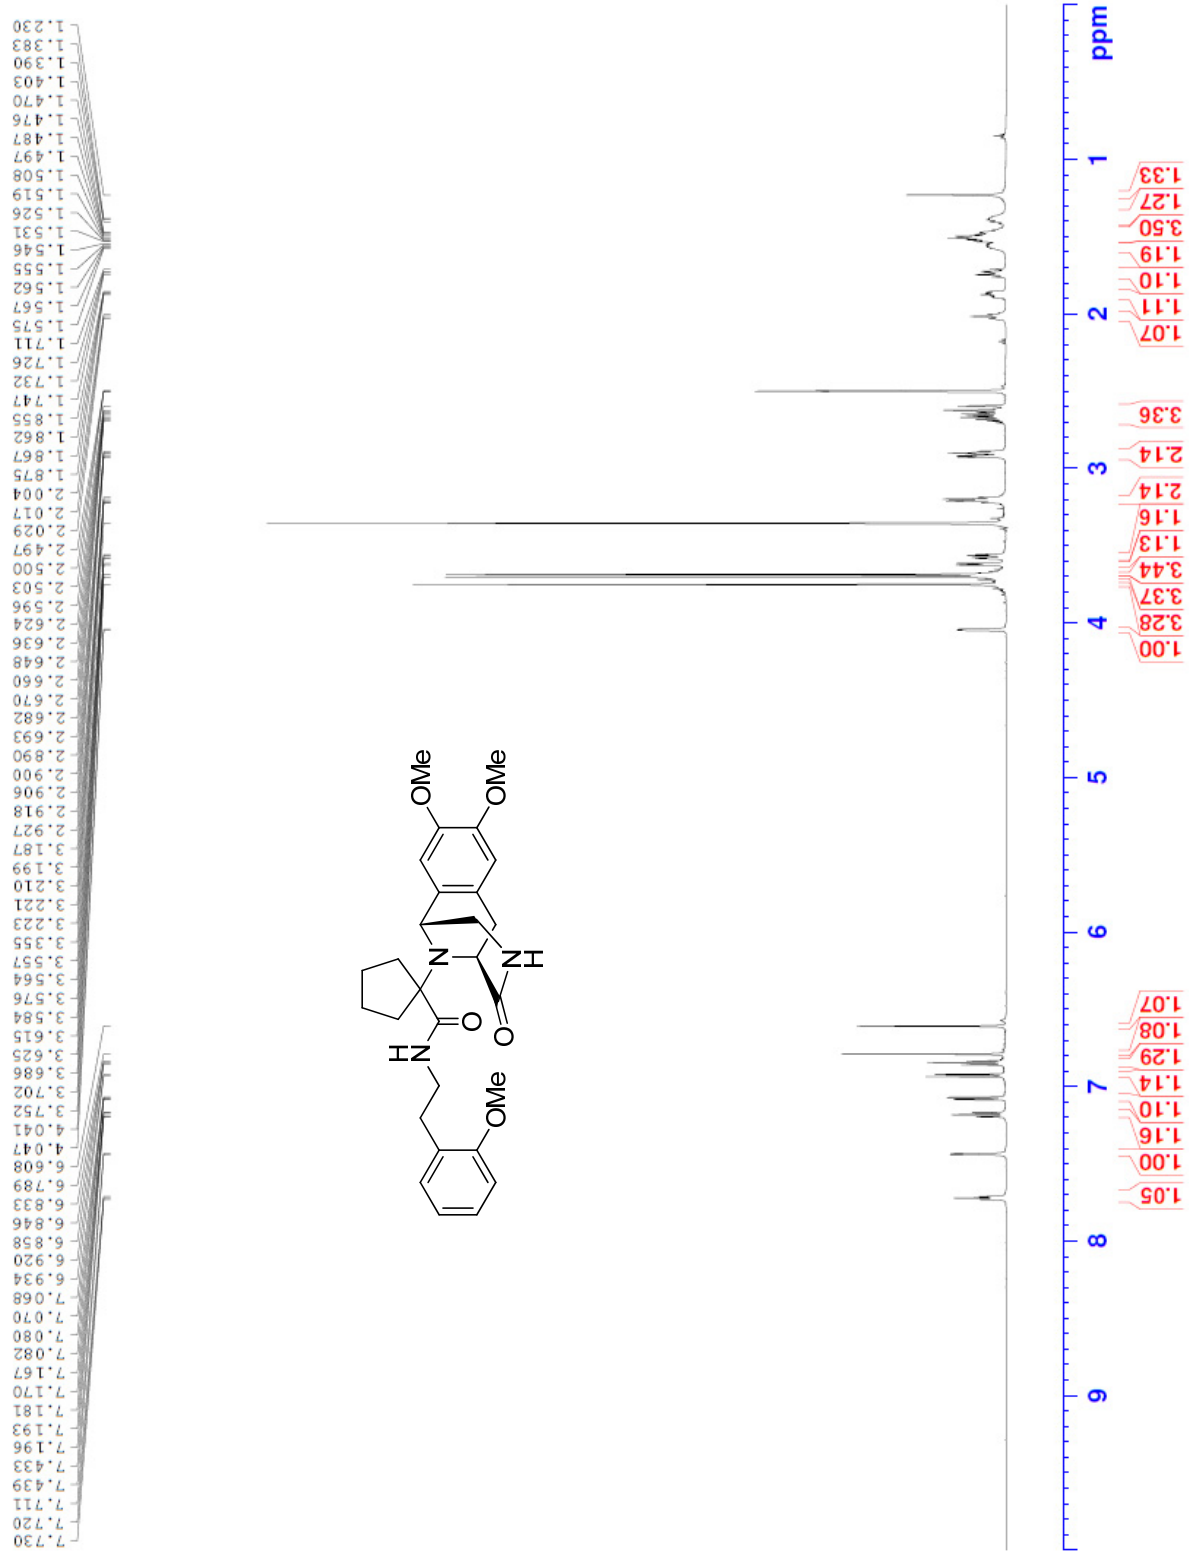

Compound-42

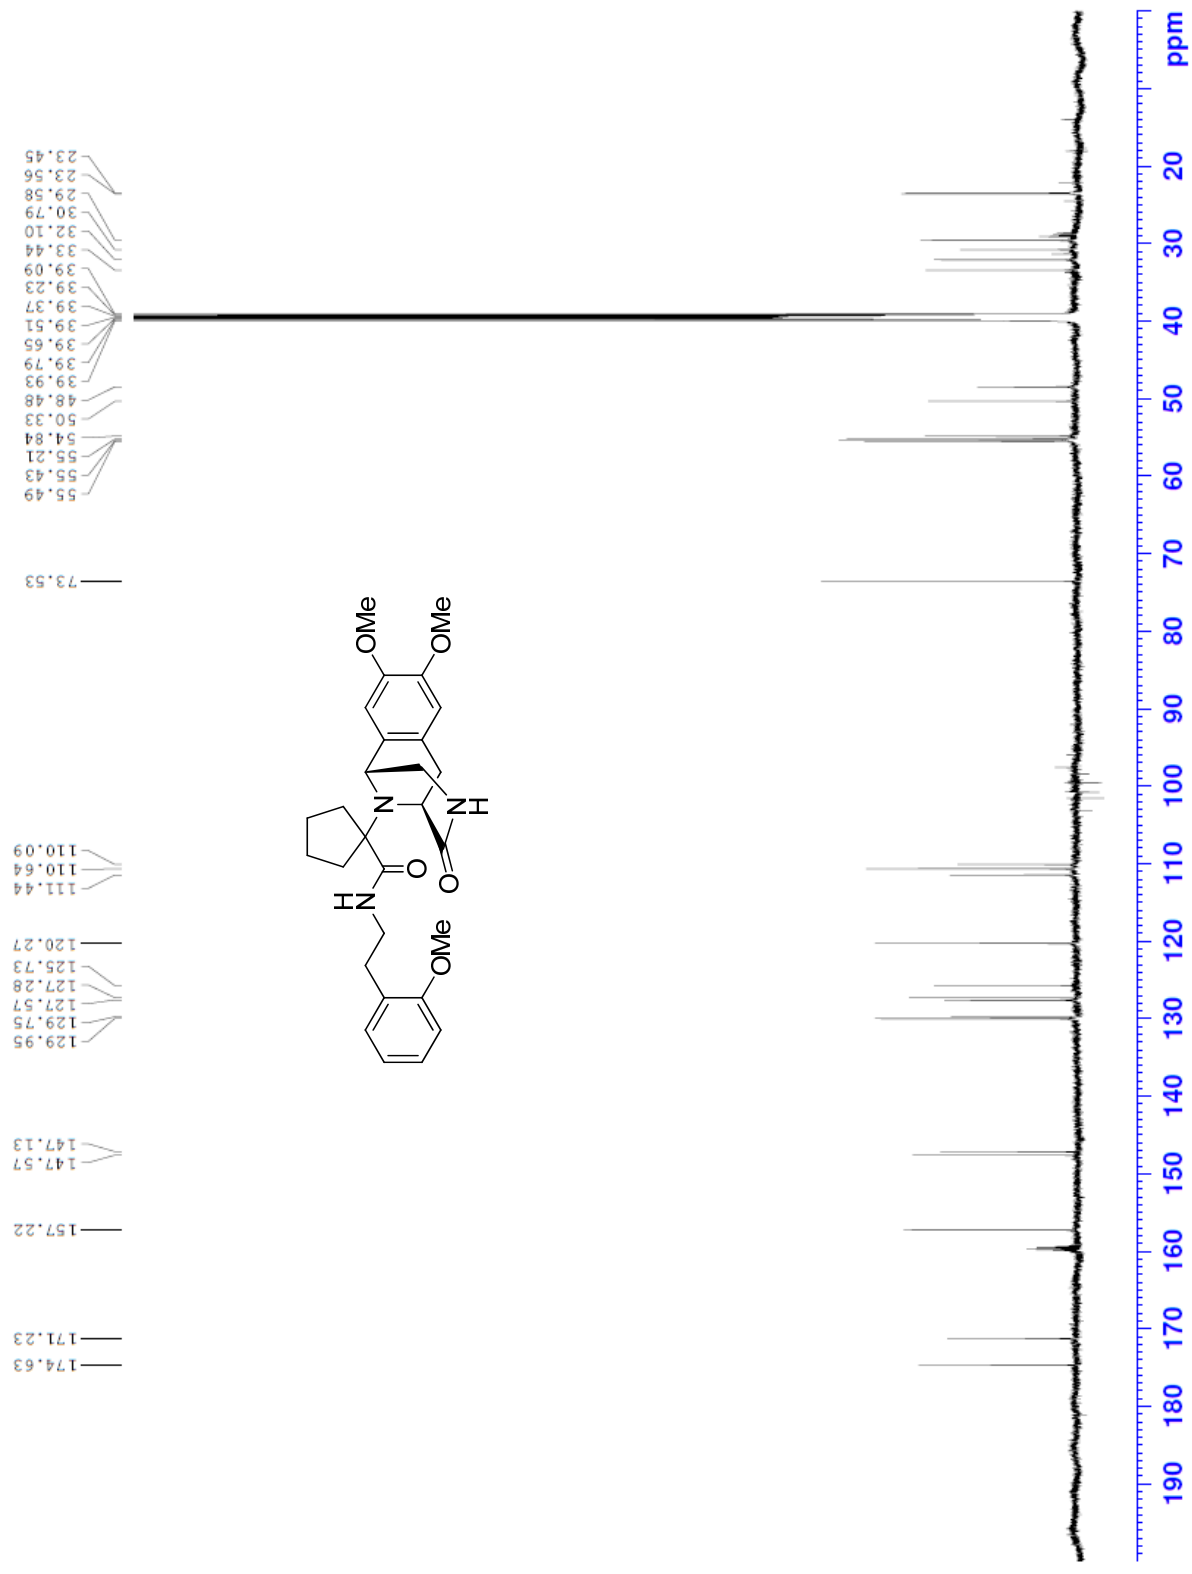

Compound-42

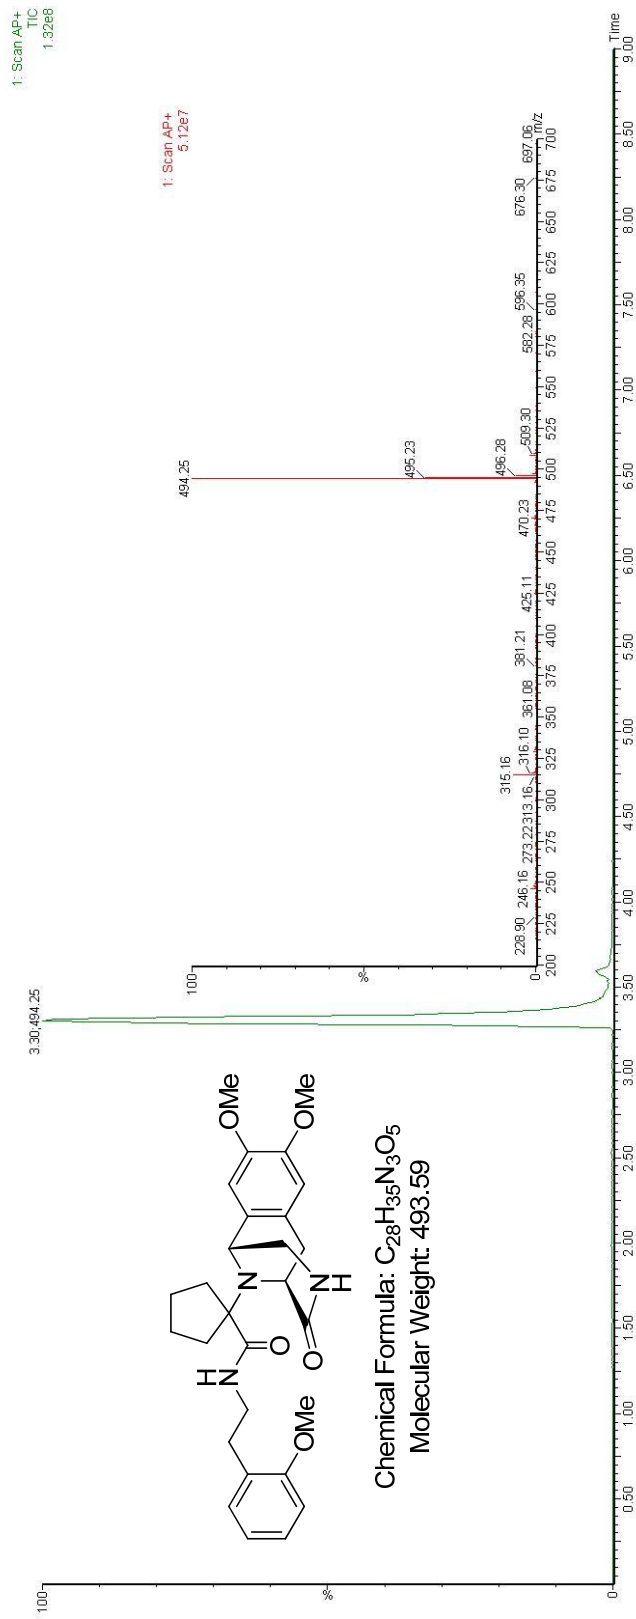

Compound-43

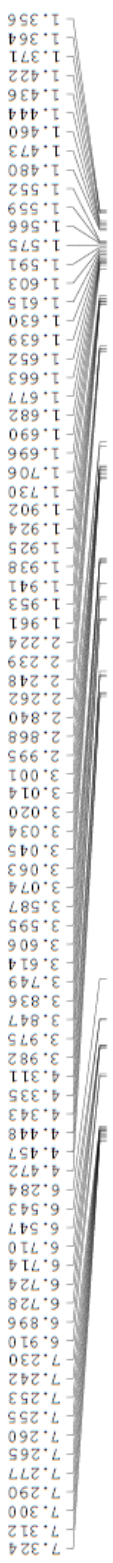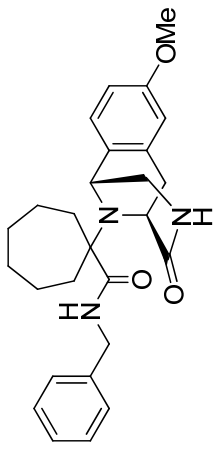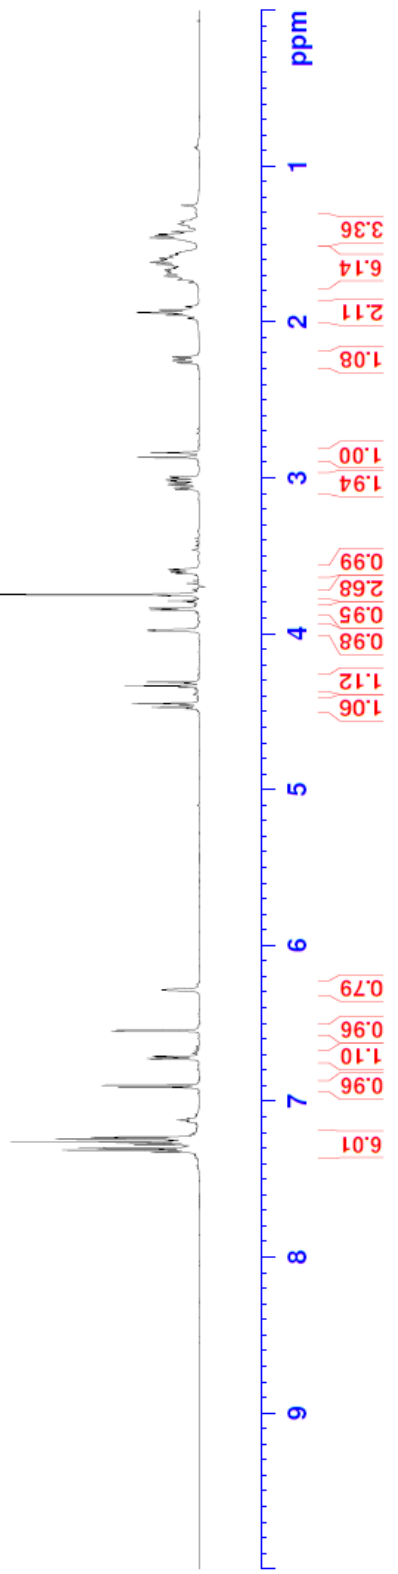

Compound-43

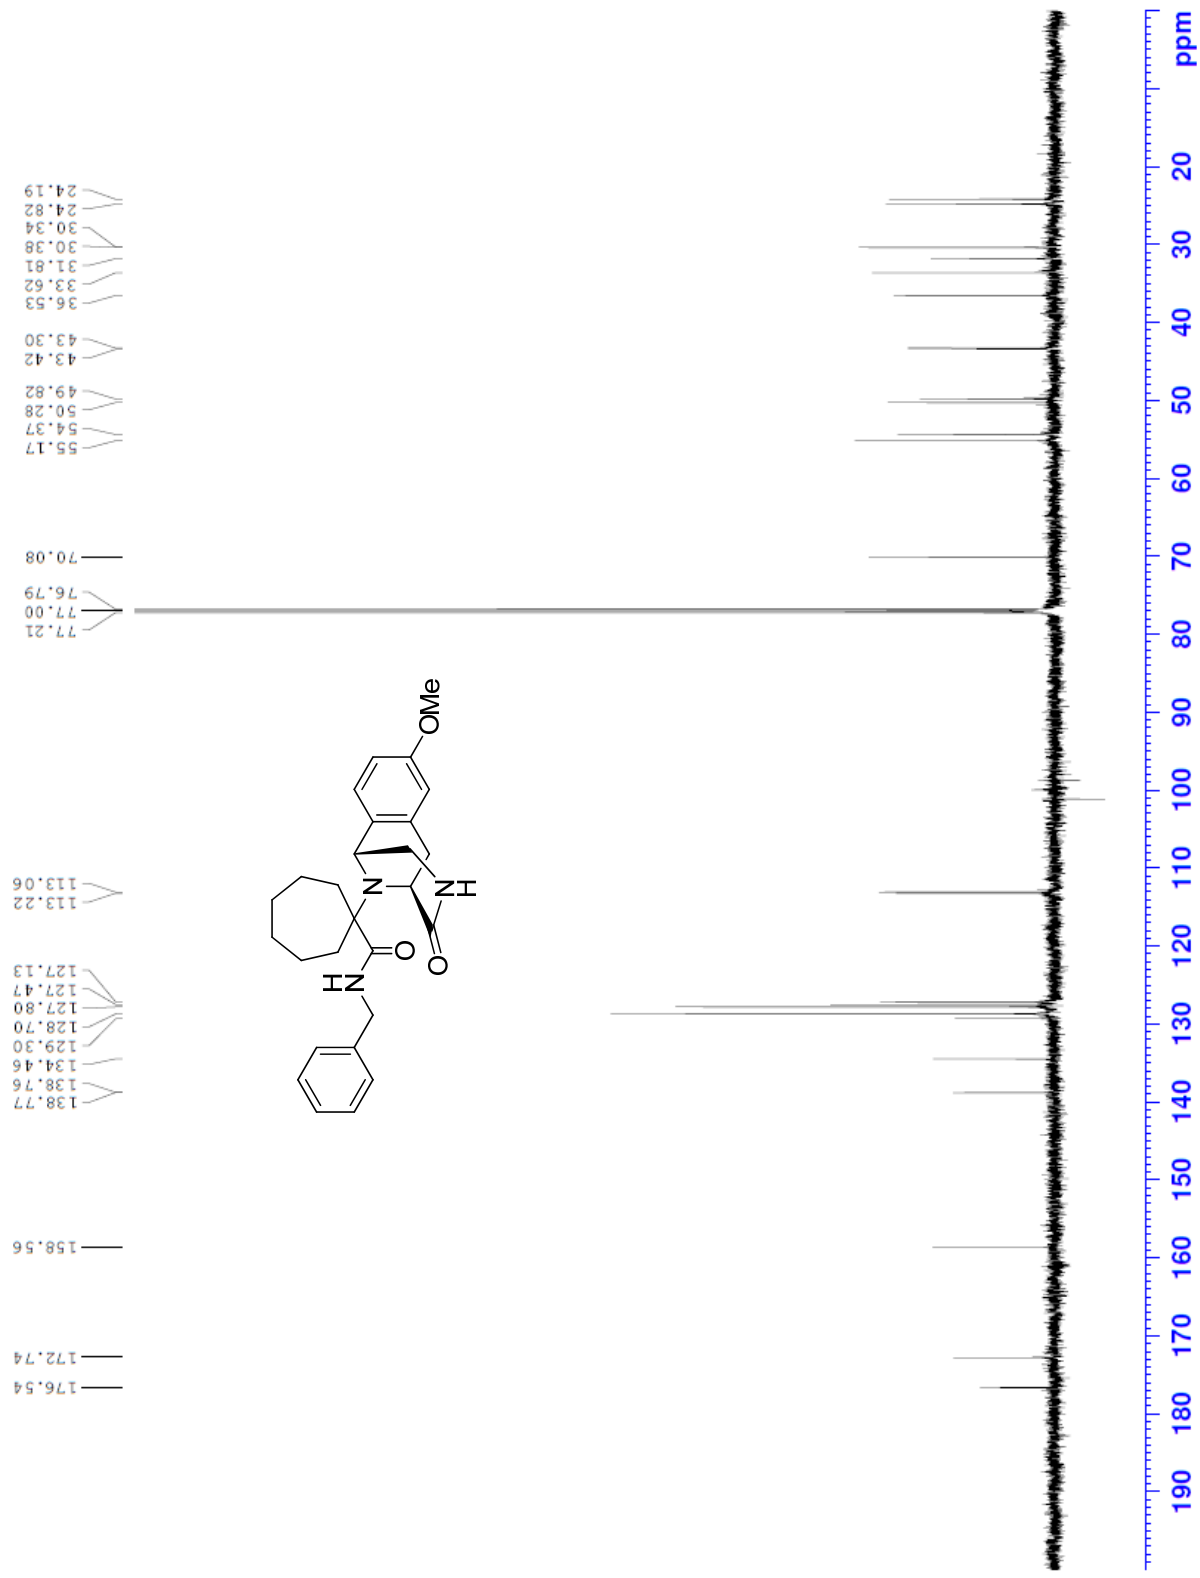

Compound-43

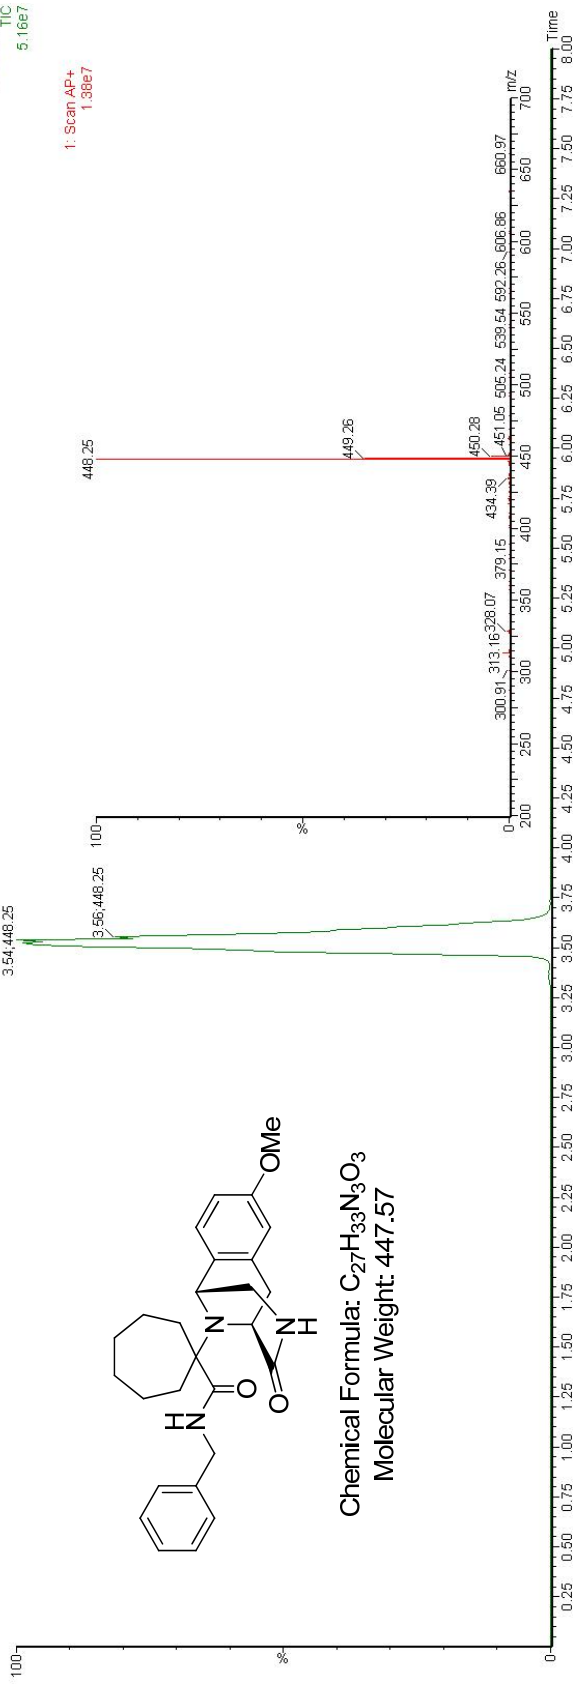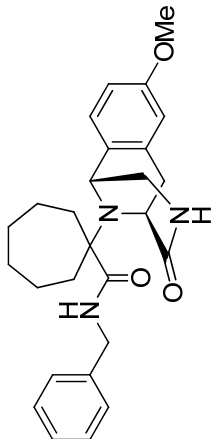

Chemical Formula: C<sub>27</sub>H<sub>33</sub>N<sub>3</sub>O<sub>3</sub>  
Molecular Weight: 447.57

Compound-44

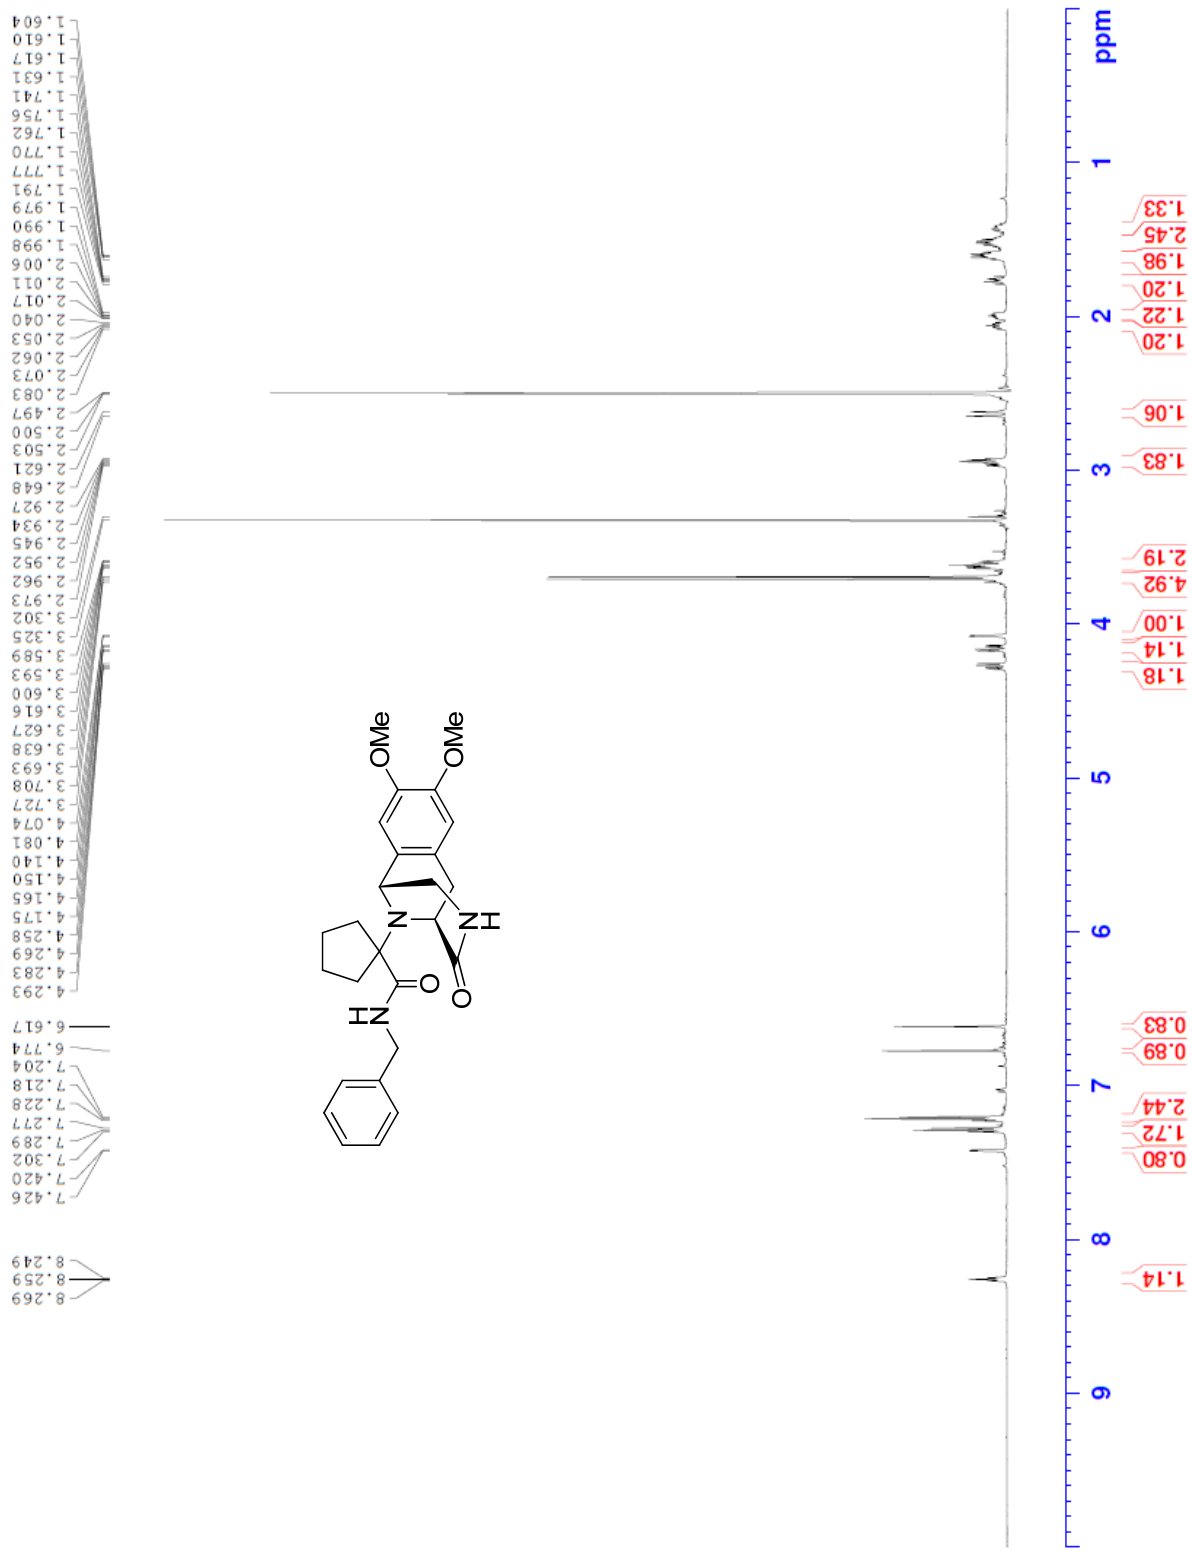

Compound-44

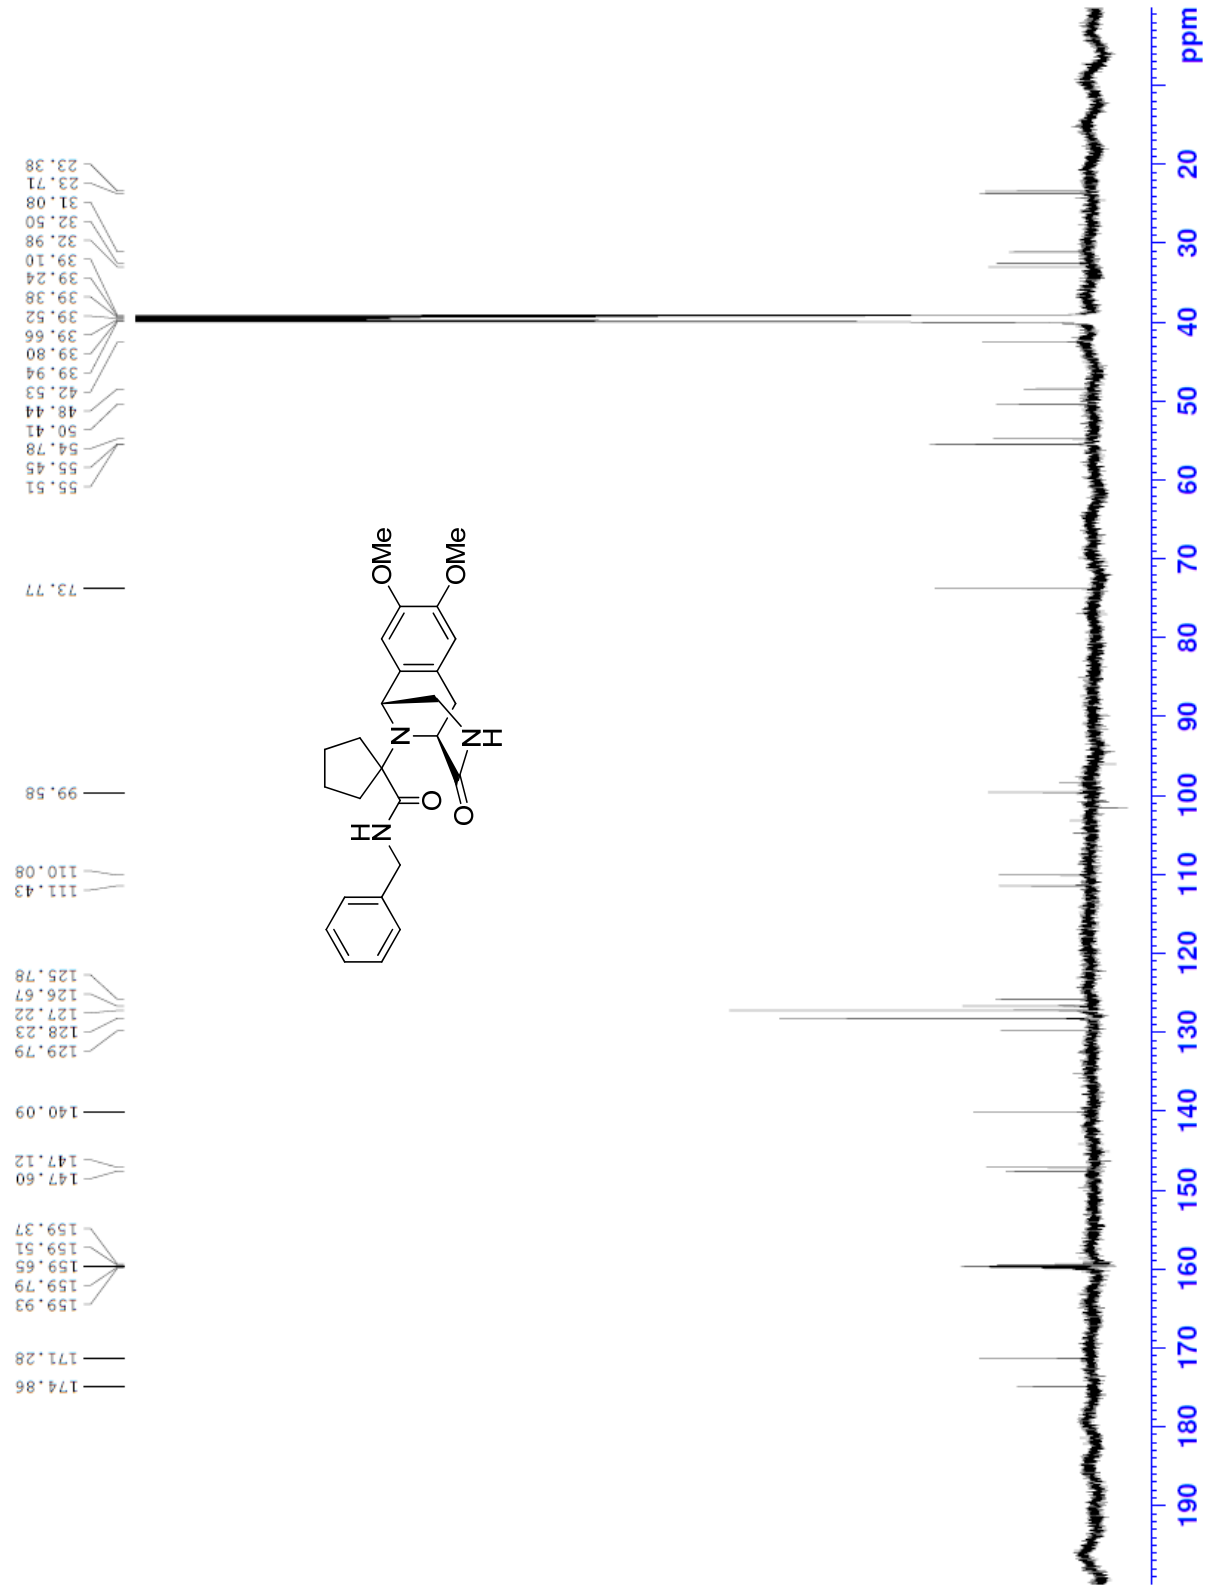



# Compound-44

1: Scan AP+  
TIC  
9.05e7

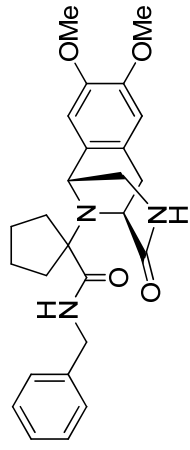

Chemical Formula:  $C_{26}H_{31}N_3O_4$   
Molecular Weight: 449.54

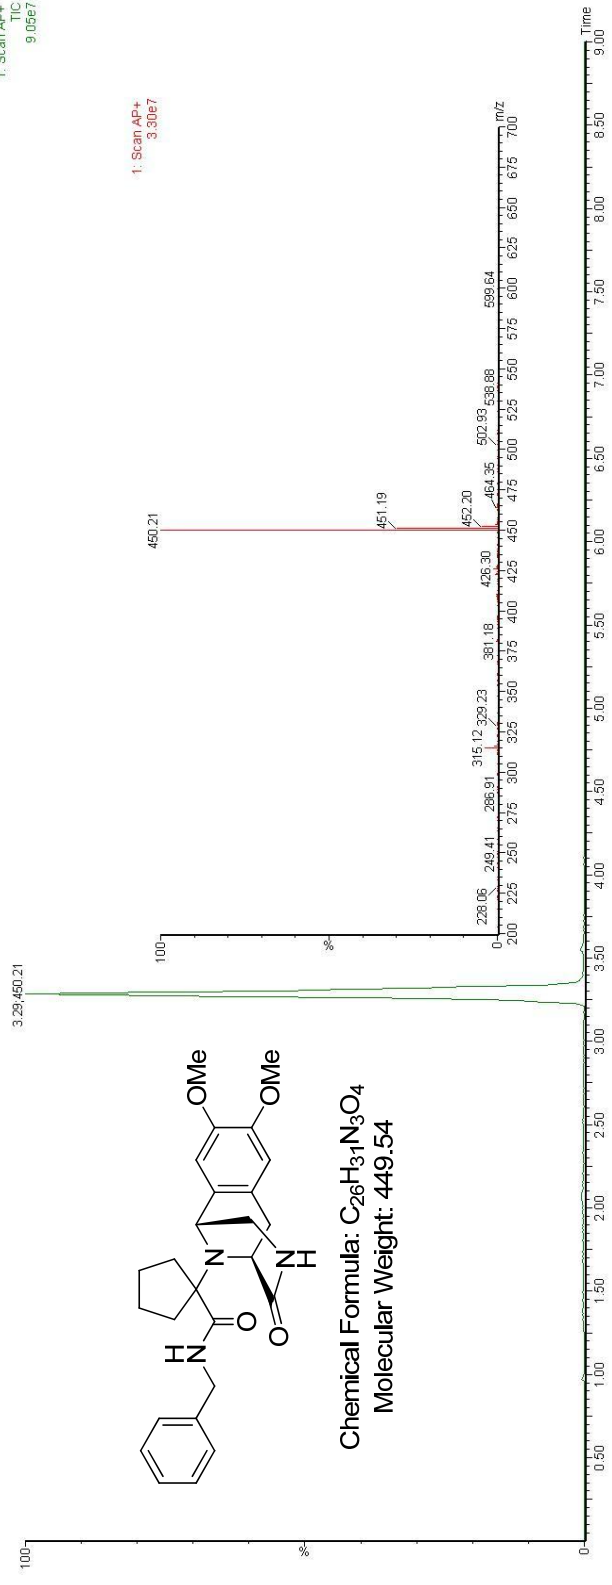

Compound-45

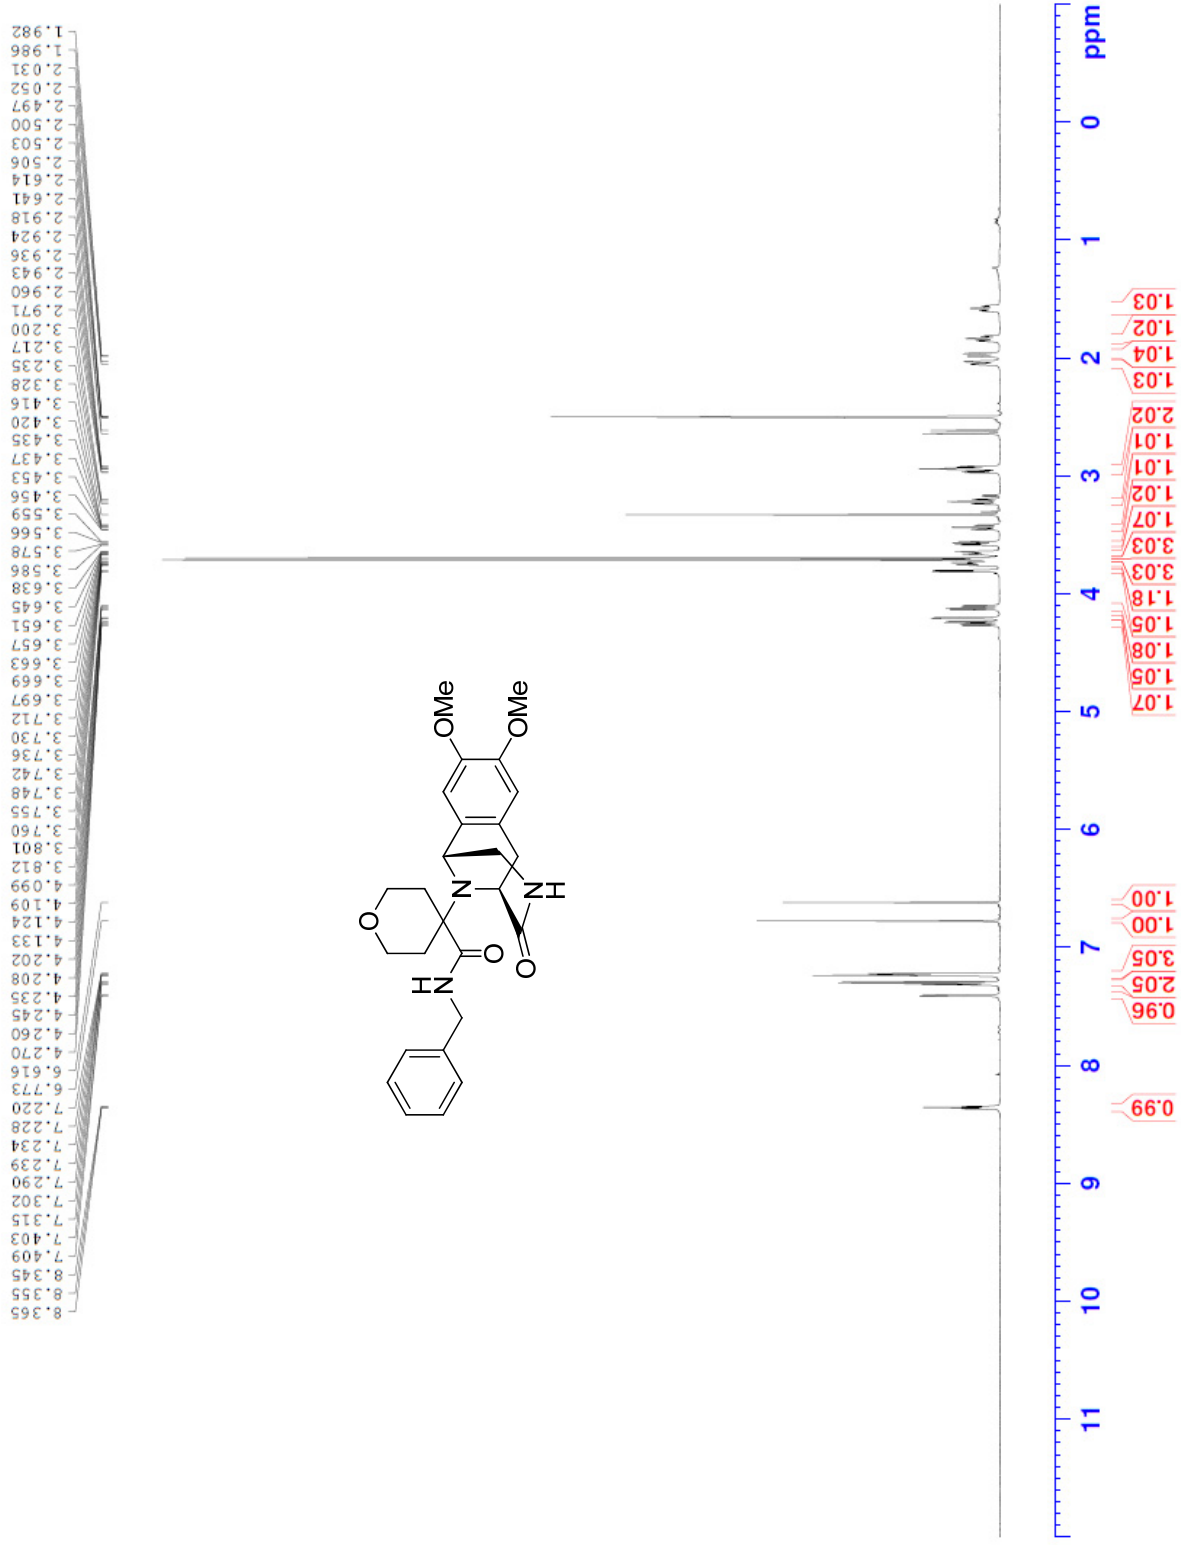

Compound-45

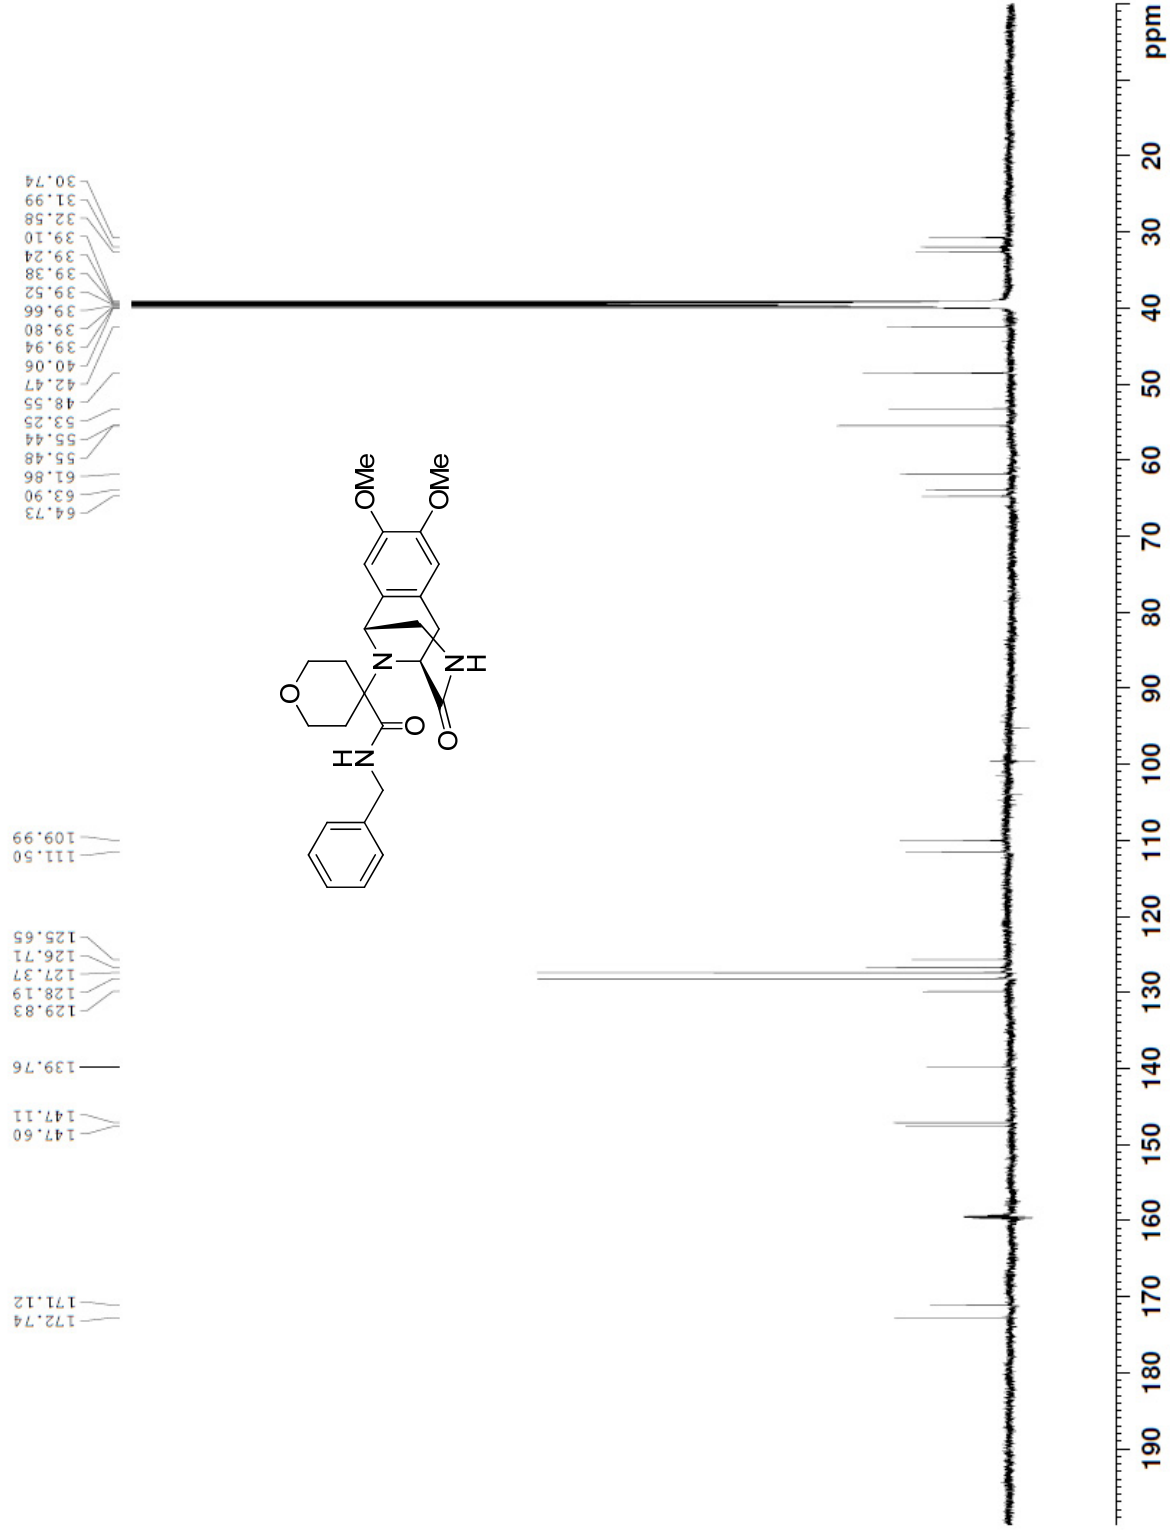

# Compound-45

1: Scan AP+  
TIC  
7.70e7

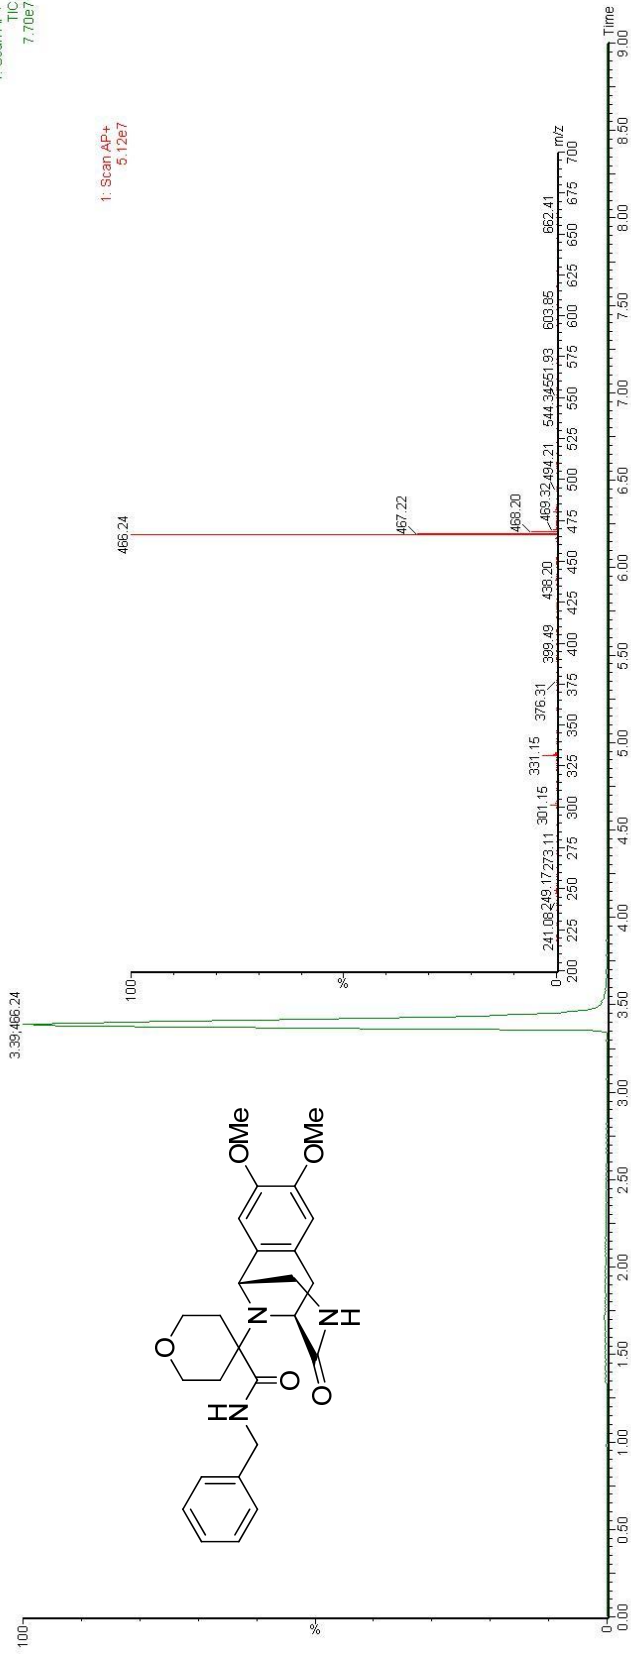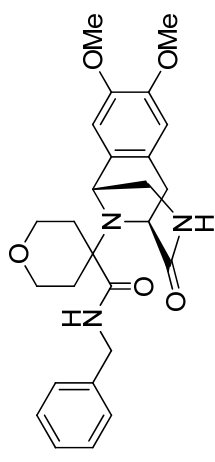

Compound-46

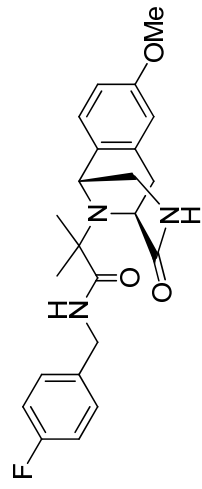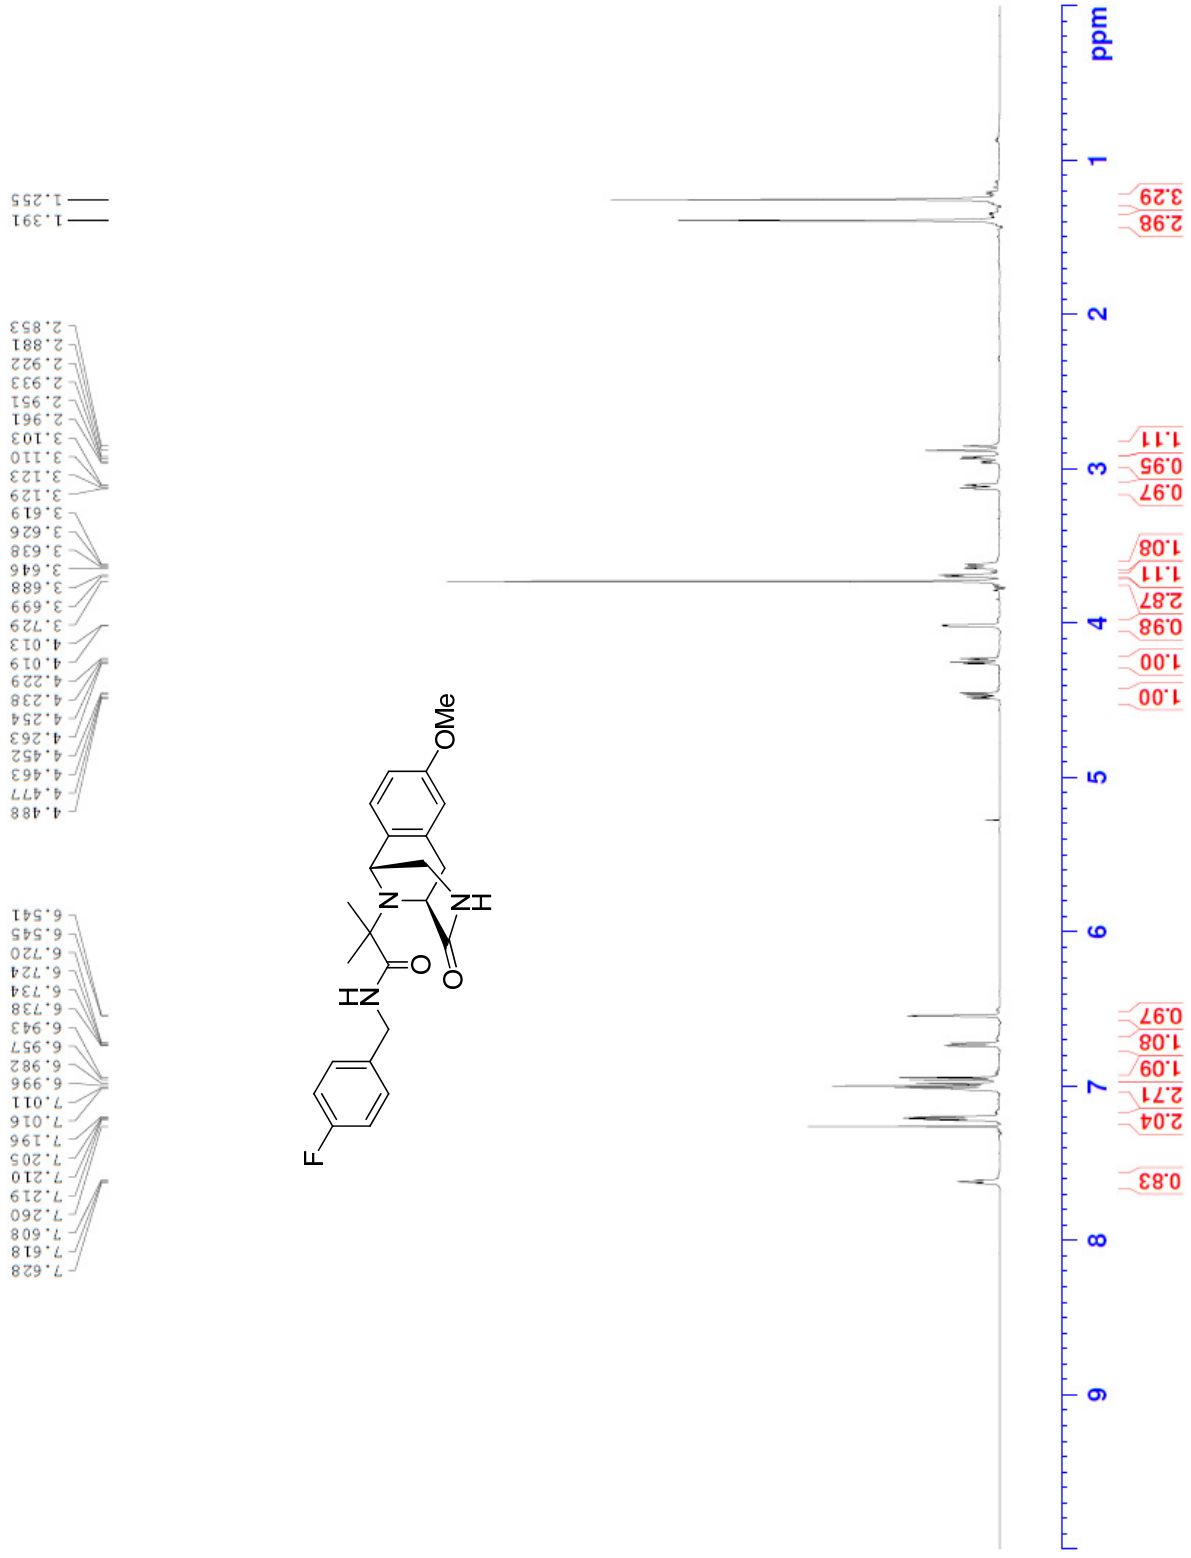

Compound-46

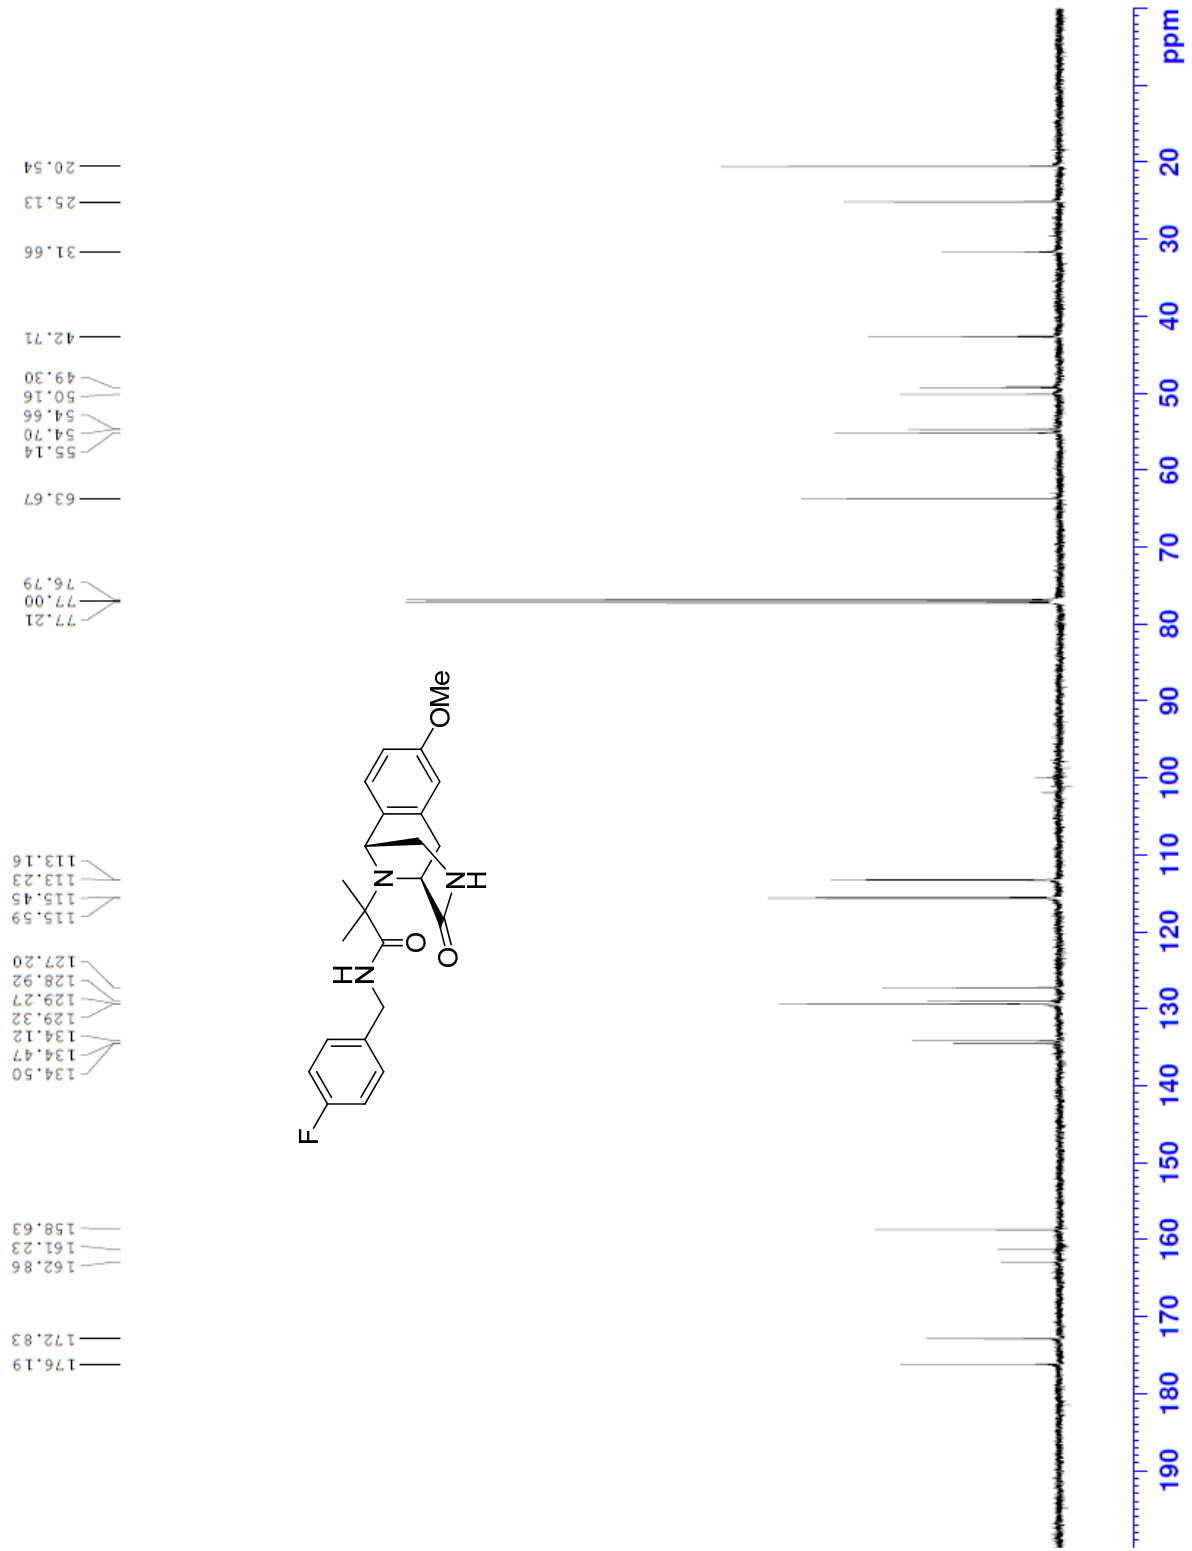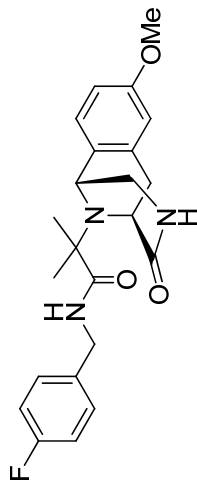

# Compound-46

1: Scan AP+  
TIC  
2.30e8

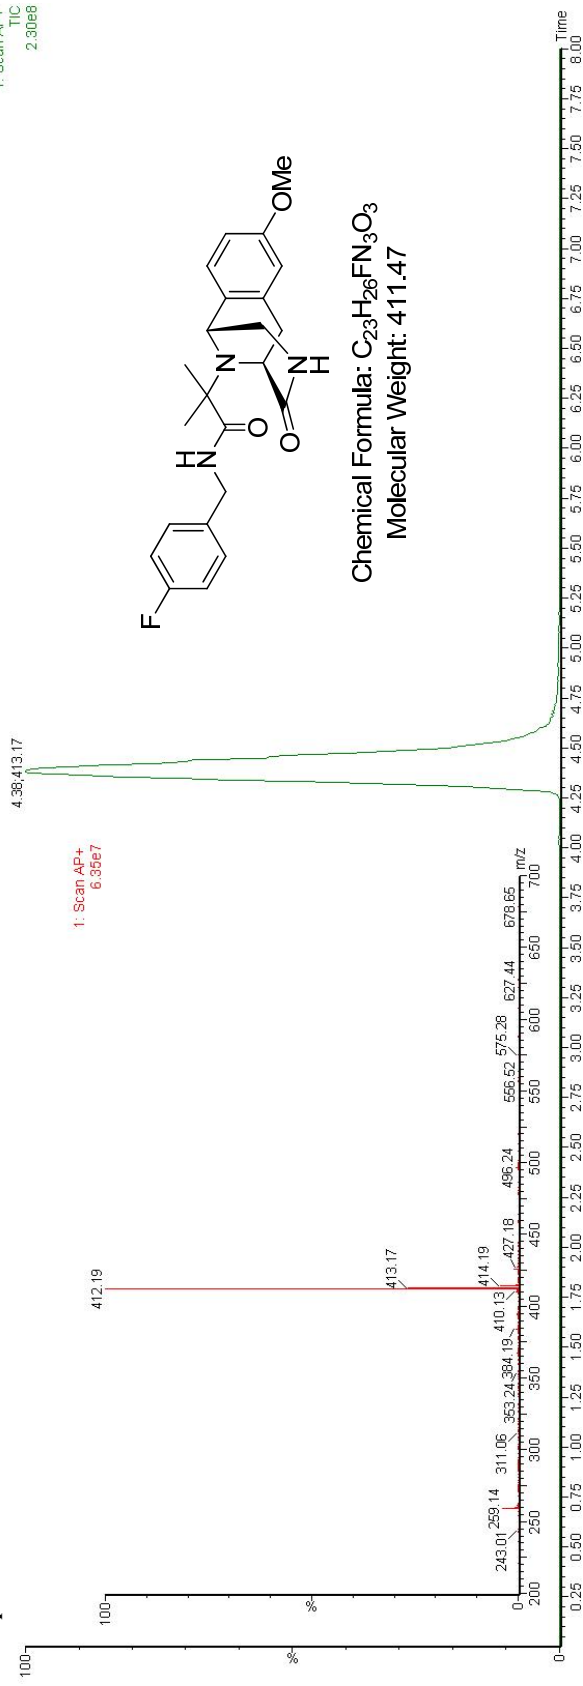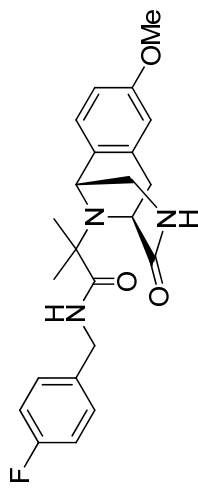

Chemical Formula:  $C_{23}H_{26}FN_3O_3$   
Molecular Weight: 411.47

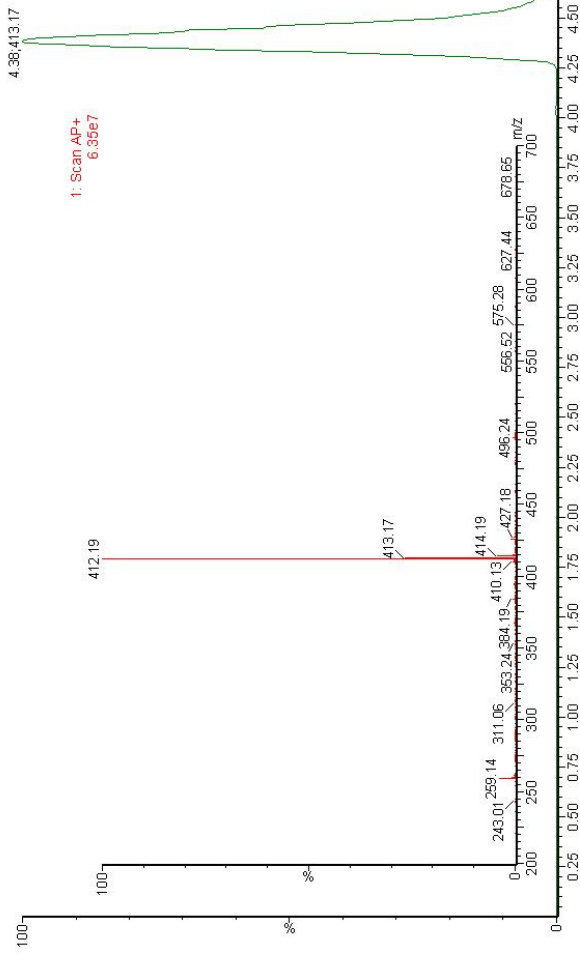

Compound-47

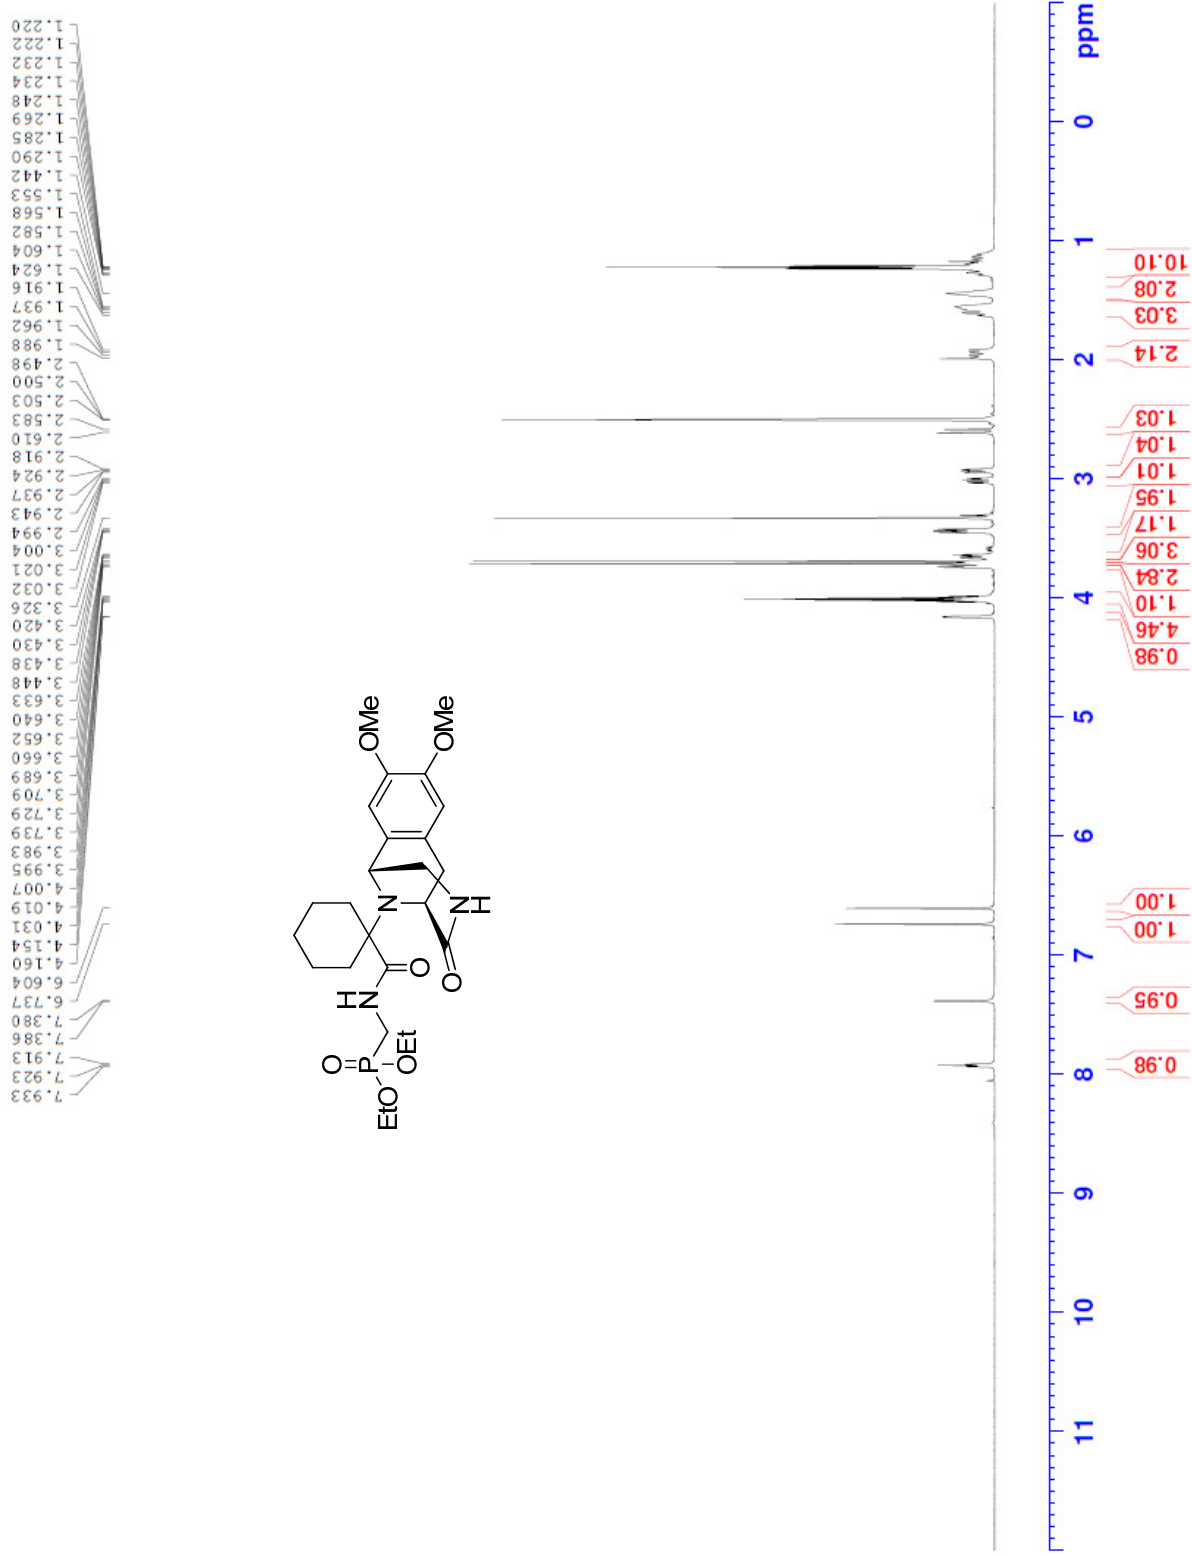



Compound-47

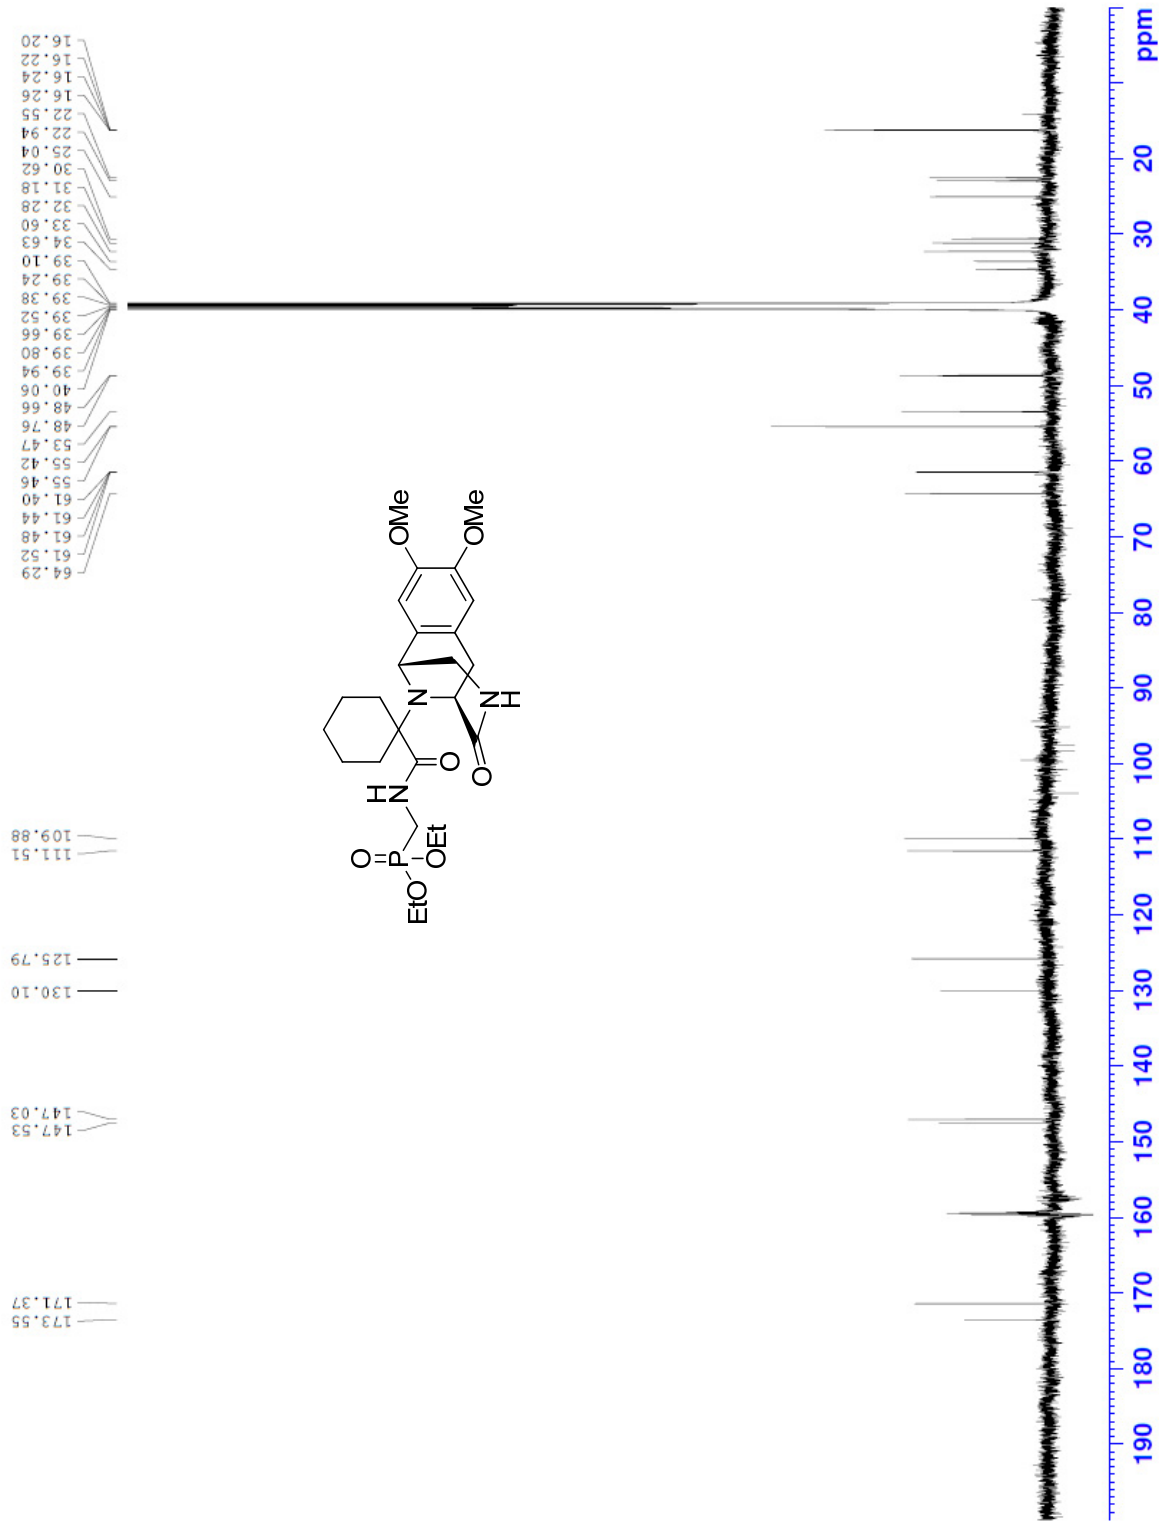

# Compound-47

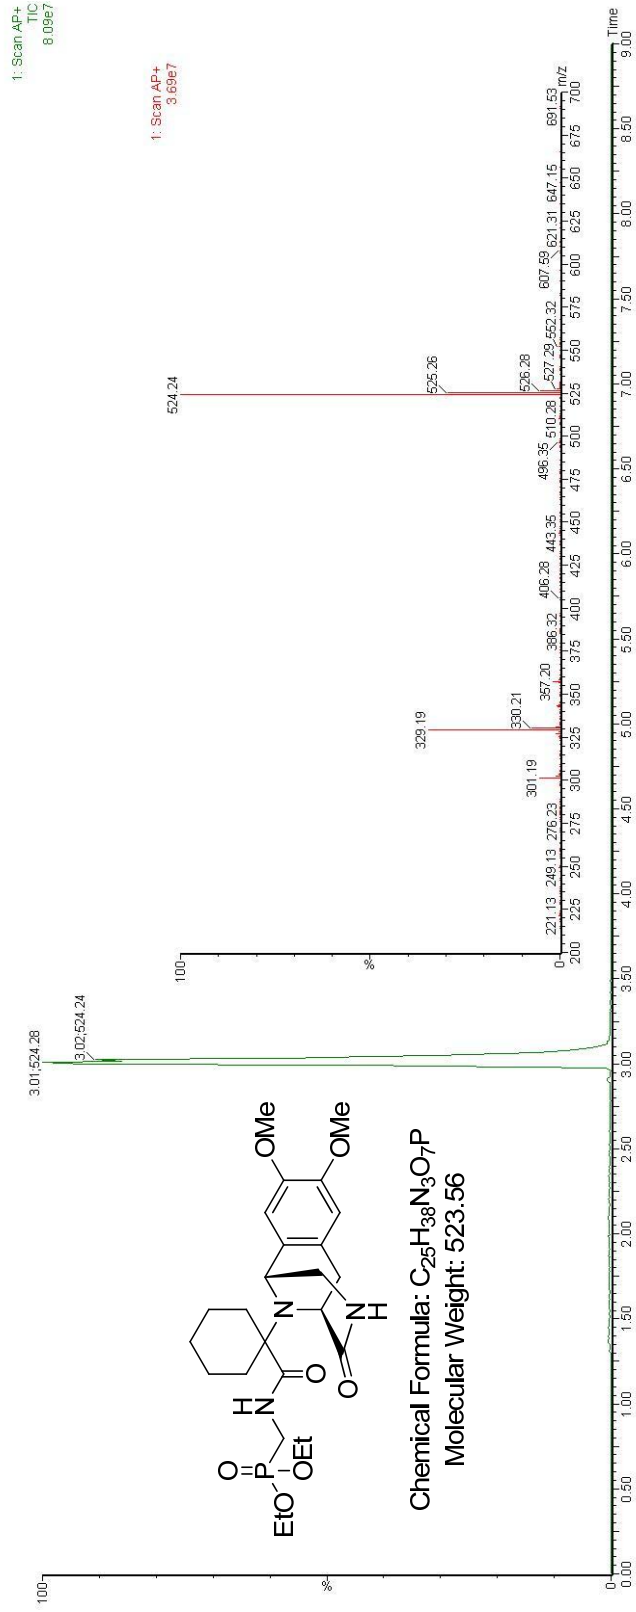

Compound-48

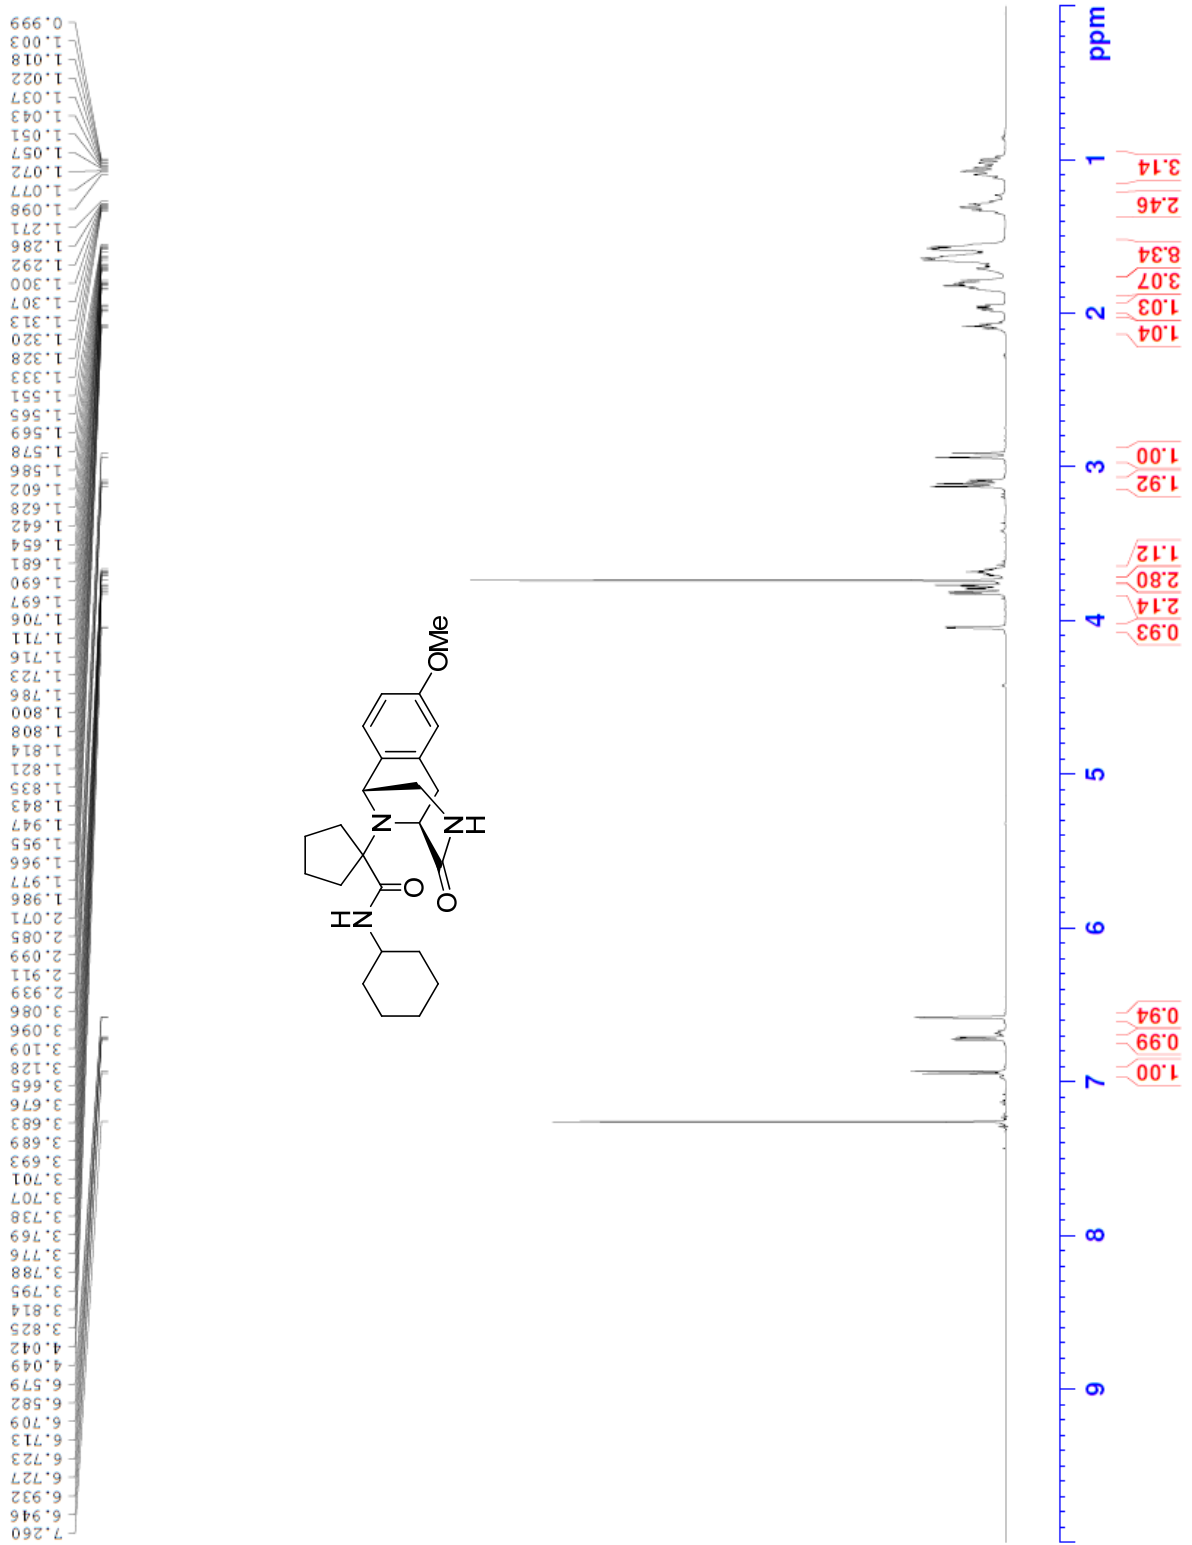

Compound-48

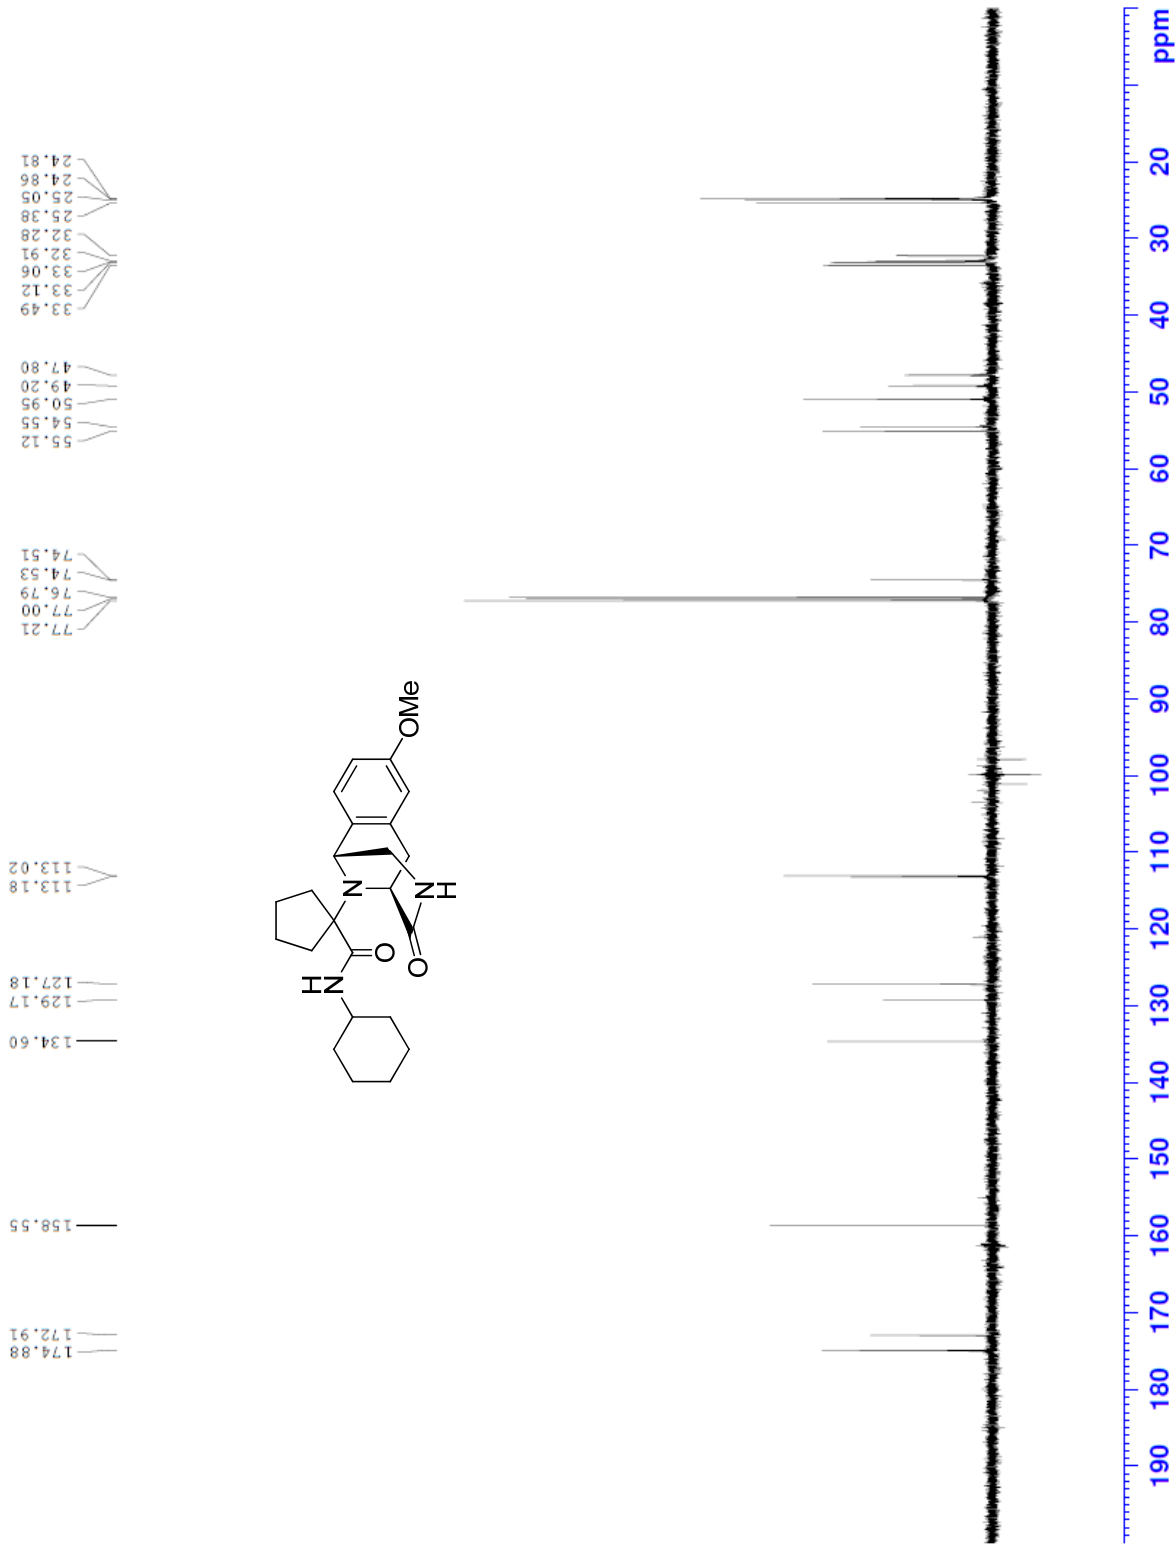



Compound-49

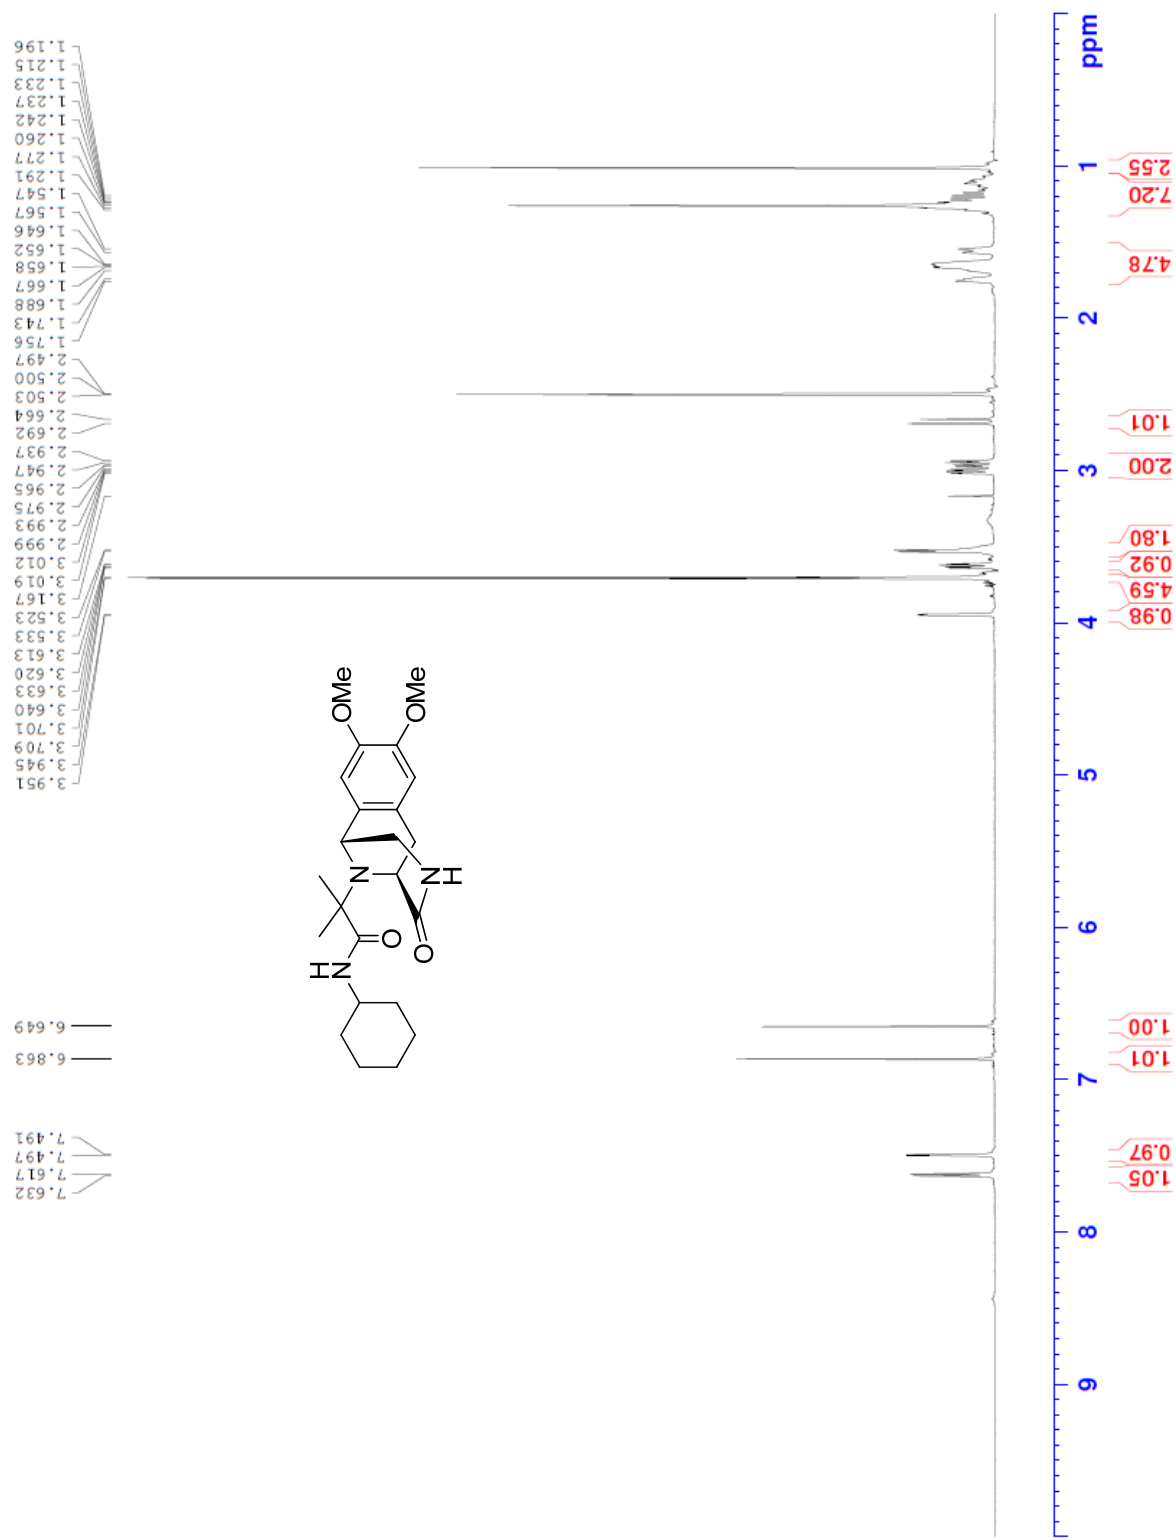

Compound-49

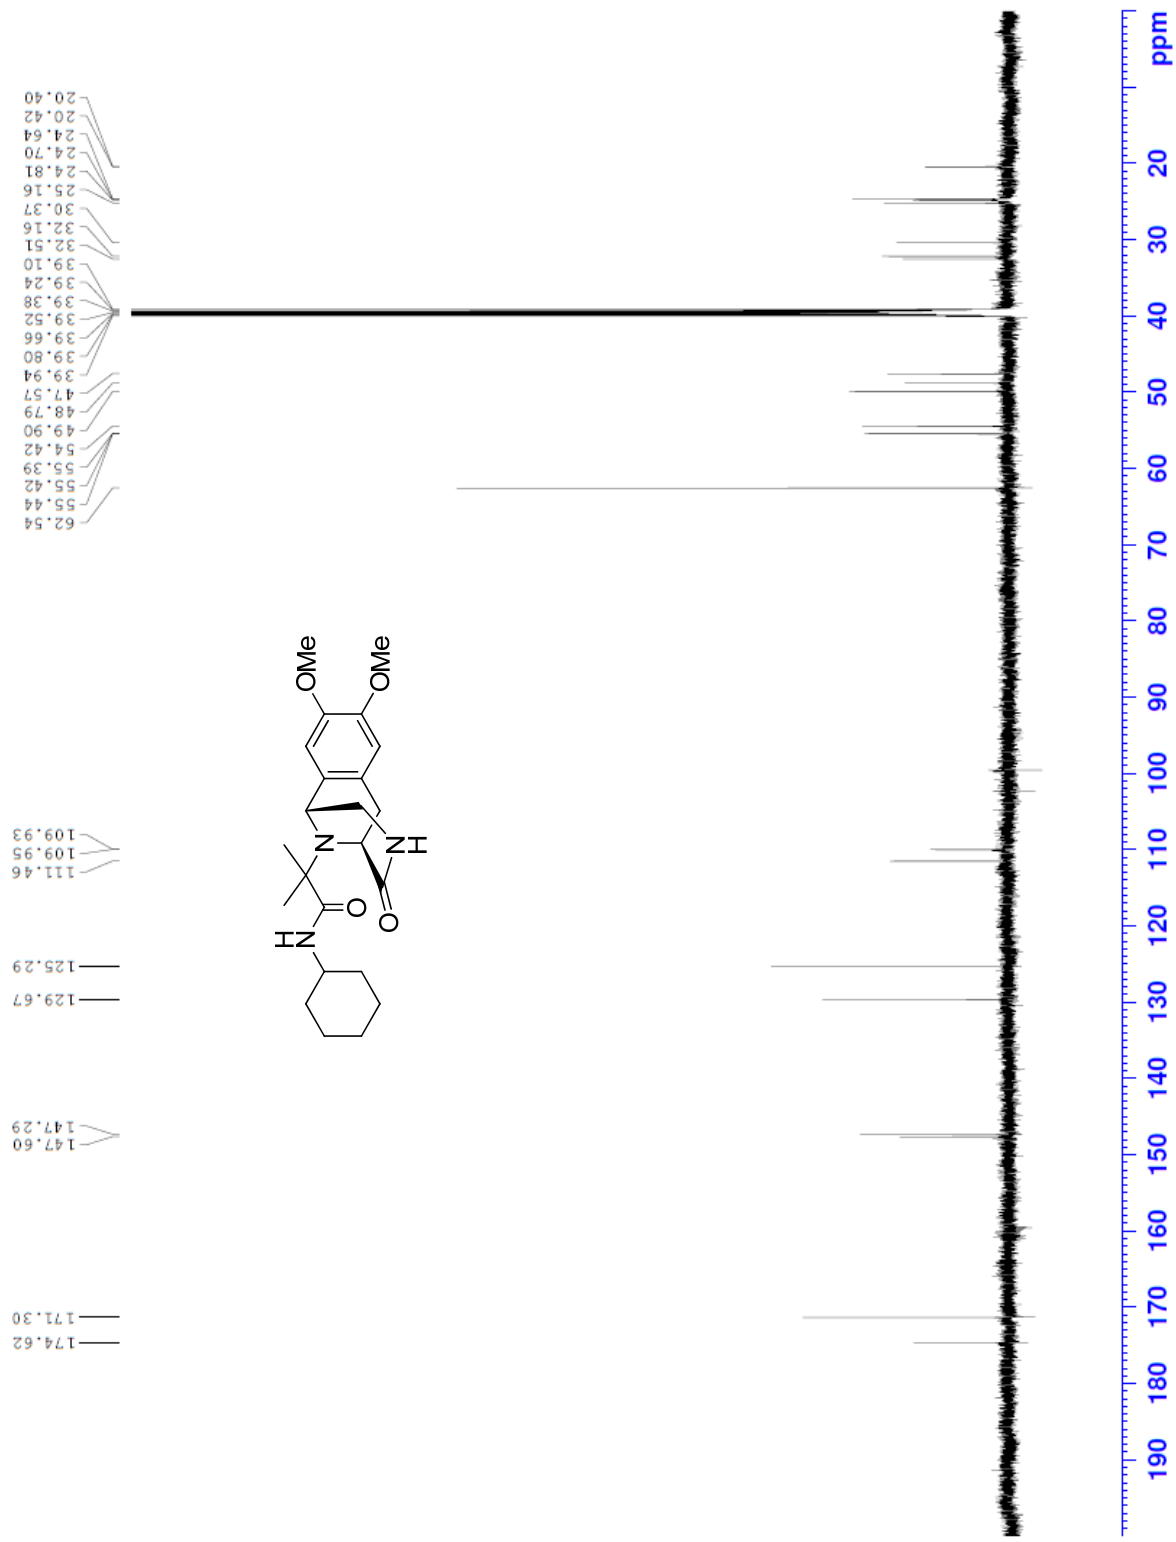

**Compound-49**

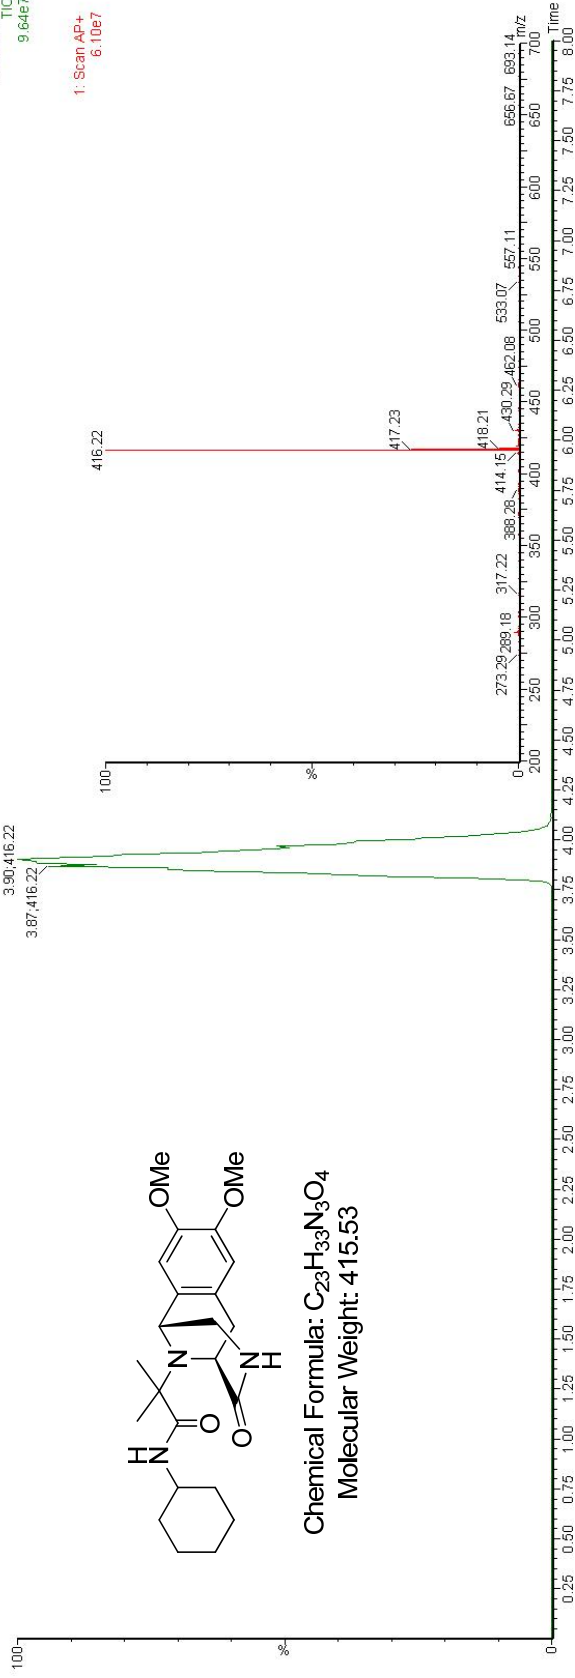

Supplement: NIHMS489369-supplement-Supporting_Information.pdf [file NIHMS489369-supplement-Supporting_Information.pdf]
